# Supplementary material
Source: publisher figshare collection journal article supplement (https://rs.figshare.com/ndownloader/files/38310695)
Supplement: Supplementary file 1 [file 38310695]

## Sheet: tortoise_occurences
Locality	Country	Latitude	Longitude	Formation.Location.comment	MAmin	Mamax	Epoch	upper.stage	lower.stage	Genus	Species	Taxon	Author	comment	CollNo	CL	PL	size	verbal description (my comments in parentheses)	estimated	Island	Continent	Reference	Age
San Nicolas, UCMP locality V4536	Colombia	3.2	-75.2	Honda group, Cerbatana gravels and clays	6	11	Miocene	Messinian	Tortonian	Geochelone	hesterna	Geochelone hesterna	Auffenberg, 1971	Holotypus: UCMP 40200 complete shell with skull, lower jaw, and most postcrania	UCMP 40200	278	NA	NA	NA	m	n	S-America	Auffenberg W., 1971: A new fossil tortoise, with remarks on the origin of South American testudinines. Copeia 1: 106-117	8.5
Serrat-d´en-Vacquer near Perpignan, Pyrénées-Orientales	France	42.88	2.88	Upper Ruscinian	3.6	4.2	Pliocene	Zanclean	Zanclean	Titanochelon	perpiniana	Titanochelon perpiniana	(Depéret, 1885)	type locality	type locality	1140	NA	giant	NA	m	n	Europe	Lapparent de Broin F.de, 2002a: A giant tortoise from the Late Pliocene of Lesvos Island (Greece) and its possible relationships. Annales Geologiques des Pays Helleniques, 1e Serie, t.XXXIX, fasc. A: 99-130	3.9
Dmanisi	Georgia	41.32	44.35	-	1.77	1.77	Pleistocene	Lower Pleistocene	Lower Pleistocene	Testudo	graeca	Testudo graeca	Linnaeus, 1758	DM-H-14 nearly complete shell, associated 3 cervical vertebrae, fragmentary pectoral and pelvic girdle, DM-H-15, 16 neurals, DM-H-17 first costal, DM-H-18 peripherals, DM-H-19 hypoplastron	DM-H-14	195	NA	NA	NA	mf	n	Eurasia	Blain H.A., Agustí H., Lordkipanidze D., Rook L., Delfino M., 2014: Paleoclimatic and paleoenvironmental context of the Early Pleistocene hominins from Dmanisi (Georgia, Lesser Caucasus) inferred from the herpetofaunal assemblage. Quaternary Science Reviews 105: 136-150	1.77
Altenstadt, 7 km S Illertissen	Germany	48.1542	10.1178	-	11.6	12.7	Miocene	Serravallian	Serravallian	Testudo	steinheimensis	Testudo steinheimensis	(Staesche, 1931)	-	BSP 1932 I 50	111	110	NA	NA	m	n	Europe	Staesche K., 1931: Die Schildkröten des Steinheimer Beckens. A. Testudinidae. Palaeontographica, suppl. Bd.8(2): 1-17	12.15
Gammelsdorf	Germany	48.5495	11.9382	-	11.6	12.7	Miocene	Serravallian	Serravallian	Paleotestudo	antiqua	Paleotestudo antiqua	(Bronn, 1831)	T. opisthoklitea	BSP 1954 I 539a	203	178	NA	NA	m	n	Europe	Schleich H.H., 1981: Jungtertiäre Schildkröten Süddeutschlands unter besonderer Berücksichtigung der Fundstelle Sandelzhausen. Courier Forschungsinstitut Senckenberg 48: 372pp., Frankfurt	12.15
Gammelsdorf	Germany	48.5495	11.9382	-	11.6	12.7	Miocene	Serravallian	Serravallian	Paleotestudo	antiqua	Paleotestudo antiqua	(Bronn, 1831)	T. opisthoklitea	BSP 1954 I 539b	NA	167	NA	NA	m	n	Europe	Schleich H.H., 1981: Jungtertiäre Schildkröten Süddeutschlands unter besonderer Berücksichtigung der Fundstelle Sandelzhausen. Courier Forschungsinstitut Senckenberg 48: 372pp., Frankfurt	12.15
Hohenhöwen, Engen, Hegau, southwestern Germany	Germany	47.8356	8.749	pedogenic gypsum, red and yellow-mottled clays and marls	13	13	Miocene	Serravallian	Serravallian	Paleotestudo	antiqua	Paleotestudo antiqua	(Bronn, 1831)	Neotypus: MT PAL 2012.0.10 nearly intact shell, ref.mat.: FFSM 3446.1, FFSM 3446.2, FFSM 3446.3, FFSM 3446.4, SMNS 4450, SMNS 51467, SMNS 51469, UFGC 9 more or less complete shells	MT PAL 2012.0.10	185	NA	NA	NA	mf	n	Europe	Corsini J.A., Böhme M., Joyce W.G., 2014: Reappraisal of Testudo antiqua (Testudines, Testudinidae) from the Miocene of Hohenhöwen, Germany. Journal of Paleontology 88(5):948-966	13
Hohenhöwen, Engen, Hegau, southwestern Germany	Germany	47.8356	8.749	pedogenic gypsum, red and yellow-mottled clays and marls	13	13	Miocene	Serravallian	Serravallian	Paleotestudo	antiqua	Paleotestudo antiqua	(Bronn, 1831)	Neotypus: MT PAL 2012.0.10 nearly intact shell, ref.mat.: FFSM 3446.1, FFSM 3446.2, FFSM 3446.3, FFSM 3446.4, SMNS 4450, SMNS 51467, SMNS 51469, UFGC 9 more or less complete shells	FFSM3446.1	229	NA	NA	NA	mf	n	Europe	Corsini J.A., Böhme M., Joyce W.G., 2014: Reappraisal of Testudo antiqua (Testudines, Testudinidae) from the Miocene of Hohenhöwen, Germany. Journal of Paleontology 88(5):948-966	13
Hohenhöwen, Engen, Hegau, southwestern Germany	Germany	47.8356	8.749	pedogenic gypsum, red and yellow-mottled clays and marls	13	13	Miocene	Serravallian	Serravallian	Paleotestudo	antiqua	Paleotestudo antiqua	(Bronn, 1831)	Neotypus: MT PAL 2012.0.10 nearly intact shell, ref.mat.: FFSM 3446.1, FFSM 3446.2, FFSM 3446.3, FFSM 3446.4, SMNS 4450, SMNS 51467, SMNS 51469, UFGC 9 more or less complete shells	FFSM 3446.2	220	NA	NA	NA	mf	n	Europe	Corsini J.A., Böhme M., Joyce W.G., 2014: Reappraisal of Testudo antiqua (Testudines, Testudinidae) from the Miocene of Hohenhöwen, Germany. Journal of Paleontology 88(5):948-966	13
Hohenhöwen, Engen, Hegau, southwestern Germany	Germany	47.8356	8.749	pedogenic gypsum, red and yellow-mottled clays and marls	13	13	Miocene	Serravallian	Serravallian	Paleotestudo	antiqua	Paleotestudo antiqua	(Bronn, 1831)	Neotypus: MT PAL 2012.0.10 nearly intact shell, ref.mat.: FFSM 3446.1, FFSM 3446.2, FFSM 3446.3, FFSM 3446.4, SMNS 4450, SMNS 51467, SMNS 51469, UFGC 9 more or less complete shells	FFSM 3446.3	195	NA	NA	NA	mf	n	Europe	Corsini J.A., Böhme M., Joyce W.G., 2014: Reappraisal of Testudo antiqua (Testudines, Testudinidae) from the Miocene of Hohenhöwen, Germany. Journal of Paleontology 88(5):948-966	13
Hohenhöwen, Engen, Hegau, southwestern Germany	Germany	47.8356	8.749	pedogenic gypsum, red and yellow-mottled clays and marls	13	13	Miocene	Serravallian	Serravallian	Paleotestudo	antiqua	Paleotestudo antiqua	(Bronn, 1831)	Neotypus: MT PAL 2012.0.10 nearly intact shell, ref.mat.: FFSM 3446.1, FFSM 3446.2, FFSM 3446.3, FFSM 3446.4, SMNS 4450, SMNS 51467, SMNS 51469, UFGC 9 more or less complete shells	FFSM 3446.4	206	NA	NA	NA	mf	n	Europe	Corsini J.A., Böhme M., Joyce W.G., 2014: Reappraisal of Testudo antiqua (Testudines, Testudinidae) from the Miocene of Hohenhöwen, Germany. Journal of Paleontology 88(5):948-966	13
Hohenhöwen, Engen, Hegau, southwestern Germany	Germany	47.8356	8.749	pedogenic gypsum, red and yellow-mottled clays and marls	13	13	Miocene	Serravallian	Serravallian	Paleotestudo	antiqua	Paleotestudo antiqua	(Bronn, 1831)	Neotypus: MT PAL 2012.0.10 nearly intact shell, ref.mat.: FFSM 3446.1, FFSM 3446.2, FFSM 3446.3, FFSM 3446.4, SMNS 4450, SMNS 51467, SMNS 51469, UFGC 9 more or less complete shells	SMNS 4450 (incomplete)	195	186	NA	incomplete	m	n	Europe	Corsini J.A., Böhme M., Joyce W.G., 2014: Reappraisal of Testudo antiqua (Testudines, Testudinidae) from the Miocene of Hohenhöwen, Germany. Journal of Paleontology 88(5):948-966|Schleich H.H., 1981: Jungtertiäre Schildkröten Süddeutschlands unter besonderer Berücksichtigung der Fundstelle Sandelzhausen. Courier Forschungsinstitut Senckenberg 48: 372pp., Frankfurt	13
Hohenhöwen, Engen, Hegau, southwestern Germany	Germany	47.8356	8.749	pedogenic gypsum, red and yellow-mottled clays and marls	13	13	Miocene	Serravallian	Serravallian	Paleotestudo	antiqua	Paleotestudo antiqua	(Bronn, 1831)	Neotypus: MT PAL 2012.0.10 nearly intact shell, ref.mat.: FFSM 3446.1, FFSM 3446.2, FFSM 3446.3, FFSM 3446.4, SMNS 4450, SMNS 51467, SMNS 51469, UFGC 9 more or less complete shells	SMNS 51467	NA	145	NA	NA	m	n	Europe	Corsini J.A., Böhme M., Joyce W.G., 2014: Reappraisal of Testudo antiqua (Testudines, Testudinidae) from the Miocene of Hohenhöwen, Germany. Journal of Paleontology 88(5):948-966|Schleich H.H., 1981: Jungtertiäre Schildkröten Süddeutschlands unter besonderer Berücksichtigung der Fundstelle Sandelzhausen. Courier Forschungsinstitut Senckenberg 48: 372pp., Frankfurt	13
Hohenhöwen, Engen, Hegau, southwestern Germany	Germany	47.8356	8.749	pedogenic gypsum, red and yellow-mottled clays and marls	13	13	Miocene	Serravallian	Serravallian	Paleotestudo	antiqua	Paleotestudo antiqua	(Bronn, 1831)	Neotypus: MT PAL 2012.0.10 nearly intact shell, ref.mat.: FFSM 3446.1, FFSM 3446.2, FFSM 3446.3, FFSM 3446.4, SMNS 4450, SMNS 51467, SMNS 51469, UFGC 9 more or less complete shells	SMNS 51469	180	NA	NA	NA	m	n	Europe	Corsini J.A., Böhme M., Joyce W.G., 2014: Reappraisal of Testudo antiqua (Testudines, Testudinidae) from the Miocene of Hohenhöwen, Germany. Journal of Paleontology 88(5):948-966|Schleich H.H., 1981: Jungtertiäre Schildkröten Süddeutschlands unter besonderer Berücksichtigung der Fundstelle Sandelzhausen. Courier Forschungsinstitut Senckenberg 48: 372pp., Frankfurt	13
Hohenhöwen, Engen, Hegau, southwestern Germany	Germany	47.8356	8.749	pedogenic gypsum, red and yellow-mottled clays and marls	13	13	Miocene	Serravallian	Serravallian	Paleotestudo	antiqua	Paleotestudo antiqua	(Bronn, 1831)	Neotypus: MT PAL 2012.0.10 nearly intact shell, ref.mat.: FFSM 3446.1, FFSM 3446.2, FFSM 3446.3, FFSM 3446.4, SMNS 4450, SMNS 51467, SMNS 51469, UFGC 9 more or less complete shells	UFGC 9	145	NA	NA	NA	mf	n	Europe	Corsini J.A., Böhme M., Joyce W.G., 2014: Reappraisal of Testudo antiqua (Testudines, Testudinidae) from the Miocene of Hohenhöwen, Germany. Journal of Paleontology 88(5):948-966	13
Hohenhöwen, Engen, Hegau, southwestern Germany	Germany	47.8356	8.749	pedogenic gypsum, red and yellow-mottled clays and marls	13	13	Miocene	Serravallian	Serravallian	Paleotestudo	antiqua	Paleotestudo antiqua	(Bronn, 1831)	-	-	152	134	NA	NA	m	n	Europe	Schleich H.H., 1981: Jungtertiäre Schildkröten Süddeutschlands unter besonderer Berücksichtigung der Fundstelle Sandelzhausen. Courier Forschungsinstitut Senckenberg 48: 372pp., Frankfurt	13
Hohenhöwen, Engen, Hegau, southwestern Germany	Germany	47.8356	8.749	pedogenic gypsum, red and yellow-mottled clays and marls	13	13	Miocene	Serravallian	Serravallian	Paleotestudo	antiqua	Paleotestudo antiqua	(Bronn, 1831)	-	-	240	NA	NA	NA	m	n	Europe	Schleich H.H., 1981: Jungtertiäre Schildkröten Süddeutschlands unter besonderer Berücksichtigung der Fundstelle Sandelzhausen. Courier Forschungsinstitut Senckenberg 48: 372pp., Frankfurt	13
Kirchdorf an der Iller	Germany	48.0728	10.1424	Flussbett der Iller ca. 15m nördlich der Kirchdorf-Fellheimer Wehrschwelle	16.5	16.8	Miocene	Burdigalian	Burdigalian	Geochelone	sp.	Geochelone sp.	Fitzinger, 1835	nearly complete articulated sceleton, carapax size about 100 cm	-	1000	NA	NA	NA	m	n	Europe	FosFarBase	16.65
Sandelzhausen	Germany	48.6283	11.796	Ältere Serie, OSM C+D C5Cn.2n-2r to C5Cn.1n-1r	16.27	16.47	Miocene	Burdigalian	Burdigalian	Testudo	rectogularis	Testudo rectogularis	Schleich, 1981	Holotypus: BSP 1959 II 1172	Holotypus: BSP 1959 II 1172	213	180	NA	der leider nur fragmentär überlieferte Panzer des Typusexemplares misst eine rekonstruierbare Länge von 21,3 cm bei einer Breite von 15,2 cm und einer mittleren Höhre von 10,3 cm.	mo	n	Europe	Schleich H.H., 1981: Jungtertiäre Schildkröten Süddeutschlands unter besonderer Berücksichtigung der Fundstelle Sandelzhausen. Courier Forschungsinstitut Senckenberg 48: 372pp., Frankfurt	16.37
Sandelzhausen unterer Geröllmergel (B)	Germany	48.6283	11.796	Pisces indet. (8)	16.27	16.47	Miocene	Burdigalian	Burdigalian	Titanochelon	cf. perpiniana	Titanochelon cf. perpiniana	(Depéret, 1885)	-	1959 II 2033	NA	910	NA	NA	mo	n	Europe	Schleich H.H., 1981: Jungtertiäre Schildkröten Süddeutschlands unter besonderer Berücksichtigung der Fundstelle Sandelzhausen. Courier Forschungsinstitut Senckenberg 48: 372pp., Frankfurt	16.37
Steinheim a. Albuch	Germany	48.6939	10.0678	-	12.5	13.5	Miocene	Serravallian	Serravallian	Testudo	steinheimensis	Testudo steinheimensis	Staesche, 1931	SMNS, possible Paleotestudo, Lapparent de Broin et al. 2006	Tüb. 1	NA	207	NA	NA	mf	n	Europe	Schleich H.H., 1981: Jungtertiäre Schildkröten Süddeutschlands unter besonderer Berücksichtigung der Fundstelle Sandelzhausen. Courier Forschungsinstitut Senckenberg 48: 372pp., Frankfurt	13
Liossati, Kiourka	Greece	38.1692	23.8434	Pikermi (similar)	2.588	5.332	Pliocene	Pliocene	Pliocene	Testudo	sp.	Testudo sp.	Linnaeus, 1758	-	-	1200	NA	giant	Die Länge des gesamten Carapax der Riesenschildkröte wird auf ungefähr 1,20 m geschätzt	mf	n	Europe	Bachmayer, F., & Symeonidis, N. (1977). Eine neue „Pikermi “Fundstelle im Gebiet von Liossati (Kiourka) nördlich von Athen (Griechenland)(Beschreibung einer Riesenschildkröte). In Annales Géologiques des Pays Helléniques (Vol. 28, pp. 8-16).	3.96
Samos 1	Greece	37.8	26.9	Mytilinii Formation	5.3	7.2	Miocene	Messinian	Messinian	Titanochelon	schafferi	Titanochelon schafferi	(Szalai, 1931)	Holotypus: NHMW 2009z0103/0001 skull	NHMW 2009z0103/0001	1850	NA	giant	giant form from the Miocene of Samos	m	y	Europe	Lapparent de Broin F.de, 2002a: A giant tortoise from the Late Pliocene of Lesvos Island (Greece) and its possible relationships. Annales Geologiques des Pays Helleniques, 1e Serie, t.XXXIX, fasc. A: 99-130	6.25
Lesbos Island, F-Site	Greece	39.5	26.5	attributed to the Late Pliocene, ca. 2 MY, MN17 (Dermitzakis & Drinia, 1999)	2	2	Pleistocene	Gelasian	Gelasian	Titanochelon	aff. schafferi	Titanochelon aff. schafferi	(Szalai, 1931)	cf. Cheirogaster, VM multiple remains	-	1860	NA	NA	NA	m	y	Europe	Lapparent de Broin F.de, 2002a: A giant tortoise from the Late Pliocene of Lesvos Island (Greece) and its possible relationships. Annales Geologiques des Pays Helleniques, 1e Serie, t.XXXIX, fasc. A: 99-130	2
Milia, Grevena, W Macedonia	Greece	40.1791	21.4756	Early Villafranchian	2.6	2.6	Pliocene	Piacencian	Piacencian	Testudo	brevitesta	Testudo brevitesta	Vlachos & Tsoukala, 2016	Holotypus: LGPUT MIL 495 post.p.carapace, ref.mat.: 255 fr.plastron, 256a neural, 256c fr.pygal, 982d l.fr.hyoplastron, 1168 l.fr.epiplastron/entoplastron, 1396 l.hyoplastron, 1592 fr.peripheral, 1633 fr.shell, 1638 fr.carapace, 1753 l.p.plastron, 1937-8	LGPUT MIL 495	300	NA	small	(fragmented)	mf	n	Europe	Vlachos E., Tsoukala E., 2016: The diverse fossil chelonians from Milia (Late Pliocene, Grevena, Greece) with a new species of Testudo Linnaeus, 1758 (Testudines: Testudinidae). Papers in Palaeontology 2(1): 71-86	2.6
Milia, Grevena, W Macedonia	Greece	40.1791	21.4756	Early Villafranchian	2.6	2.6	Pliocene	Piacencian	Piacencian	Testudo	brevitesta	Testudo brevitesta	Vlachos & Tsoukala, 2016	Holotypus: LGPUT MIL 495 post.p.carapace, ref.mat.: 255 fr.plastron, 256a neural, 256c fr.pygal, 982d l.fr.hyoplastron, 1168 l.fr.epiplastron/entoplastron, 1396 l.hyoplastron, 1592 fr.peripheral, 1633 fr.shell, 1638 fr.carapace, 1753 l.p.plastron, 1937-8	LGPUT MIL 1753	NA	150	small	(fragmented)	mf	n	Europe	Vlachos E., Tsoukala E., 2016: The diverse fossil chelonians from Milia (Late Pliocene, Grevena, Greece) with a new species of Testudo Linnaeus, 1758 (Testudines: Testudinidae). Papers in Palaeontology 2(1): 71-86	2.6
Nea Kallikratia, western Chalkidiki Peninsula, Thessaloniki area	Greece	40.3146	23.0462	Gonia Formation	2.6	5.3	Pliocene	Piacencian	Zanclean	Titanochelon	bacharidisi	Titanochelon bacharidisi	(Vlachos, Tsoukala & Corsini, 2014)	LGPUT KLK 501-528 shell fragments and posterior limb in situ	LGPUT KLK 501-528	900	NA	NA	< 1 m (no exact measurements, too fragmentary)	mo	n	Europe	Vlachos E., Tsoukala E., Corsini J., 2014: Cheirogaster bacharidisi, sp. nov., a new species of a giant tortoise from the Pliocene of Thessaloniki (Macedonia, Greece). Journal of Vertebrate Paleontology 34(3): 560-575	3.95
Epanomi (EPN I), western Chalkidiki Peninsula, Thessaloniki area	Greece	40.4046	22.898	Gonia Formation	2.6	5.3	Pliocene	Piacencian	Zanclean	Titanochelon	bacharidisi	Titanochelon bacharidisi	(Vlachos, Tsoukala & Corsini, 2014)	Holotypus: LGPUT EPN I 100-199 female individual; (maybe use C. sulcata measurements to extrapolate, similar morphology, possibly related)	LGPUT EPN I 100-199	1196	1150	NA	NA	m	n	Europe	Vlachos E., Tsoukala E., Corsini J., 2014: Cheirogaster bacharidisi, sp. nov., a new species of a giant tortoise from the Pliocene of Thessaloniki (Macedonia, Greece). Journal of Vertebrate Paleontology 34(3): 560-575	3.95
Epanomi (EPN II), western Chalkidiki Peninsula, Thessaloniki area	Greece	40.4046	22.898	Gonia Formation	2.6	5.3	Pliocene	Piacencian	Zanclean	Titanochelon	bacharidisi	Titanochelon bacharidisi	(Vlachos, Tsoukala & Corsini, 2014)	LGPUT EPN II 200-287 male individual; (subadult)(maybe use C. sulcata measurements to extrapolate, similar morphology, possibly related)	LGPUT EPN II 200-287	1164	1120	NA	subadult	m	n	Europe	Vlachos E., Tsoukala E., Corsini J., 2014: Cheirogaster bacharidisi, sp. nov., a new species of a giant tortoise from the Pliocene of Thessaloniki (Macedonia, Greece). Journal of Vertebrate Paleontology 34(3): 560-575	3.95
Nea Michaniona, western Chalkidiki Peninsula, Thessaloniki area	Greece	40.4731	22.8385	Gonia Formation	2.6	5.3	Pliocene	Piacencian	Zanclean	Titanochelon	bacharidisi	Titanochelon bacharidisi	(Vlachos, Tsoukala & Corsini, 2014)	LGPUT MIC 300-303 posterior limb	LGPUT MIC 300-303	900	NA	NA	< 1 m (no exact measurements, too fragmentary)	mo	n	Europe	Vlachos E., Tsoukala E., Corsini J., 2014: Cheirogaster bacharidisi, sp. nov., a new species of a giant tortoise from the Pliocene of Thessaloniki (Macedonia, Greece). Journal of Vertebrate Paleontology 34(3): 560-575	3.95
Megalo Emvolon 1 (MEV), 20 km SW Thessaloniki	Greece	40.5017	22.8177	Ruscinian Falaise de Karabouroun Oryctolagus odessanus, Trischizolagus dumitrescuae, Trischizolagus cf. maritsae Microspalax odessanus, Dolichopithecus rusciensis, Nyctereutes tingi, Hipparion lonigpes, Parabos macedoniae, Koufotragus bailloudi, Gazella borbonica, Sus minor	3.6	4.2	Pliocene	Zanclean	Zanclean	Testudo	cf. graeca	Testudo cf. graeca	Linnaeus, 1758	-	-	185	NA	NA	Panzerlänge=18,5 cm; Panzerbreite=13,0 cm; Panzerhöhe=11,4cm	m	n	Europe	Bachmayer F., M?ynarski M., Symeonidis N., 1980: Fossile Schiildkröten aus dem Pliozän von Megalo Emvolo (Karaburun) bei Saloniki (Griechenland) A. Eine fossile Maurische Landschildkröte (Testudo cf. graeca LINNE) B. Fossile Reste von Riesenschildkröten. Annales Géologiques des Pays Hellénique 31: 267-276	3.9
Megalo Emvolon 1 (MEV), 20 km SW Thessaloniki	Greece	40.5017	22.8177	Ruscinian Falaise de Karabouroun Oryctolagus odessanus, Trischizolagus dumitrescuae, Trischizolagus cf. maritsae Microspalax odessanus, Dolichopithecus rusciensis, Nyctereutes tingi, Hipparion lonigpes, Parabos macedoniae, Koufotragus bailloudi, Gazella borbonica, Sus minor	3.6	4.2	Pliocene	Zanclean	Zanclean	Testudo	sp.	Testudo sp.	Linnaeus, 1758	-	-	2500	NA	giant	...Reste von mindestens 2 Individuen. Die Größe der Krallenphalangen kann man die Größe der Schildkröten schätzen. [...] Es dürfte daher die Riesenschildkröte aus Karaburun mindestens ebenso groß gewesen sein als die Riesenschildkröte aus Pikermi also eine Länge von mehr als 2,5 m gehabt haben.	mf	n	Europe	Bachmayer F., M?ynarski M., Symeonidis N., 1980: Fossile Schiildkröten aus dem Pliozän von Megalo Emvolo (Karaburun) bei Saloniki (Griechenland) A. Eine fossile Maurische Landschildkröte (Testudo cf. graeca LINNE) B. Fossile Reste von Riesenschildkröten. Annales Géologiques des Pays Hellénique 31: 267-276	3.9
Megalo Emvolon 1 (MEV), 20 km SW Thessaloniki	Greece	40.5017	22.8177	Ruscinian Falaise de Karabouroun Oryctolagus odessanus, Trischizolagus dumitrescuae, Trischizolagus cf. maritsae Microspalax odessanus, Dolichopithecus rusciensis, Nyctereutes tingi, Hipparion lonigpes, Parabos macedoniae, Koufotragus bailloudi, Gazella borbonica, Sus minor	3.6	4.2	Pliocene	Zanclean	Zanclean	Testudo	sp.	Testudo sp.	Linnaeus, 1758	-	-	2500	NA	giant	...Reste von mindestens 2 Individuen. Die Größe der Krallenphalangen kann man die Größe der Schildkröten schätzen. [...] Es dürfte daher die Riesenschildkröte aus Karaburun mindestens ebenso groß gewesen sein als die Riesenschildkröte aus Pikermi also eine Länge von mehr als 2,5 m gehabt haben.	mf	n	Europe	Bachmayer F., M?ynarski M., Symeonidis N., 1980: Fossile Schiildkröten aus dem Pliozän von Megalo Emvolo (Karaburun) bei Saloniki (Griechenland) A. Eine fossile Maurische Landschildkröte (Testudo cf. graeca LINNE) B. Fossile Reste von Riesenschildkröten. Annales Géologiques des Pays Hellénique 31: 267-276	3.9
Allatini, eastern part of Thessaloniki, western Chalkidiki peninsula	Greece	40.5899	22.9716	Trilophos Formation, sands, clays, sandstones, limestones, abundant brackish mollusks	5	6	Pliocene/Miocene	Zanclean	Messinian	Testudo	graeca	Testudo graeca	Linnaeus, 1758	AMPG 1970/2 partial shell of a small tortoise (=Testudo amiatae Pantanelli, 1893 in Georgalis & Kear, 2013)	AMPG 1970/2	200	NA	small	(not sure if scalebar was accurate)	mf	n	Europe	Vlachos E., Kotsakis T., Delfino M., 2015: The chelonians from the Latest Miocene–Earliest Pliocene localities of Allatini and Pylea (East Thessaloniki, Macedonia, Greece). Comptes Rendus Palevol 14: 187-205	5.5
Pylea, eastern part of Thessaloniki, western Chalkidiki peninsula	Greece	40.5994	22.9876	Trilophos Formation, sands, clays, sandstones, limestones, abundant brackish mollusks	5	6	Pliocene/Miocene	Zanclean	Messinian	Testudo	graeca	Testudo graeca	Linnaeus, 1758	IGF 11602 partial shell of a small tortoise (total length 167 mm), IGF 11603 six structures that could represent eggs	IGF 11602	167	NA	small	NA	m	n	Europe	Vlachos E., Kotsakis T., Delfino M., 2015: The chelonians from the Latest Miocene–Earliest Pliocene localities of Allatini and Pylea (East Thessaloniki, Macedonia, Greece). Comptes Rendus Palevol 14: 187-205	5.5
Torrente Melacce, Cinigiano (GR)	Italy	42.8833	11.4	ass. faunistica V3	5.33	6.3	Miocene	Messinian	Messinian	Testudo	amiatae	Testudo amiatae	Linnaeus, 1758	-	MPUM 25	140	115	NA	C: L=140, W=115, H=85, Testudo amiatae	mo	n	Europe	Chesi, F. (2009). Il registro fossile italiano dei cheloni (Doctoral dissertation, PhD Thesis in Earth Sciences, Università di Firenze).	5.815
Santa-Vittoria d'Alba	Italy	44.7	7.9333	Piemont; lacustrine to brackish	5.33	7	Miocene	Messinian	Messinian	Testudo	sp.	Testudo sp.	Linnaeus, 1758	-	MCB 1923	200	NA	NA	NA	mf	n	Europe	Chesi, F. (2009). Il registro fossile italiano dei cheloni (Doctoral dissertation, PhD Thesis in Earth Sciences, Università di Firenze).	6.165
Etseré	Madagascar	-22.6615	43.7313	-	0.001	0.002	Holocene	Late Holocene	Late Holocene	Aldabrachelys	grandidieri	Aldabrachelys grandidieri	(Vaillant, 1885)	Lectotype, male	MNHN-P MAD3501	1240	NA	giant	NA	m	y	Africa	reptile-database.org (Bour, 1994)	0.0015
Etseré	Madagascar	-22.6615	43.7313	-	0.001	0.002	Holocene	Late Holocene	Late Holocene	Aldabrachelys	grandidieri	Aldabrachelys grandidieri	(Vaillant, 1885)	Paralectotype	MNHN-P MAD3502	1250	NA	giant	NA	mo	y	Africa	reptile-database.org (Bour, 1995)	0.0015
Ambositra	Madagascar	-20.5394	47.2472	-	0.003	0.001	Holocene	Holocene	Holocene	Aldabrachelys	abrupta	Aldabrachelys abrupta	(Grandidier, 1868)	Lectotype	MNHN-P MAD3500	1000	NA	giant	incomplete fossil male carapace, estimated length 100 cm (Bour, 1994)	mo	y	Africa	reptile-database.org (Bour, 1994)	0.002
Zebbug and Gahr Dalam Cave deposits	Malta	35.89	14.443	-	0.005	0.127	Holocene/Pleistocene	Holocene	Upper Pleistocene	Centrochelys	robusta	Centrochelys robusta	Adams, 1877	-	-	850	NA	large	NA	mo	y	Europe	Lapparent de Broin F.de, 2002a: A giant tortoise from the Late Pliocene of Lesvos Island (Greece) and its possible relationships. Annales Geologiques des Pays Helleniques, 1e Serie, t.XXXIX, fasc. A: 99-130	0.066
Altan-Teli main fossiliferous bed (Dzereg valley)	Mongolia	47.1	93.167	160 km SW of Kobdo, Great Lake Area	2.6	5.3	Pliocene	Piacencian	Zanclean	Ergilemys	oskarkuhni	Ergilemys oskarkuhni	M?ynarski(, 1968)	Holotypus: ZPAL MgCh/15 plastron and pygal portion of carapace, ref.mat.: ZPAL MgCh/16-20 fragments, (possibly related to Agrionemys, Lapperant de Broin et al. 2006)	MgCH/15	NA	180	NA	NA	m	n	Asia	Mlynarski, 1968: Notes on tortoises (Testudinidae) from the tertiary of Mongolia. Paleontologica Polonica, 19: 85-99	3.95
Altan-Teli main fossiliferous bed (Dzereg valley)	Mongolia	47.1	93.167	160 km SW of Kobdo, Great Lake Area	2.6	5.3	Pliocene	Piacencian	Zanclean	Ergilemys	oskarkuhni	Ergilemys oskarkuhni	M?ynarski(, 1968)	Holotypus: ZPAL MgCh/15 plastron and pygal portion of carapace, ref.mat.: ZPAL MgCh/16-20 fragments, (possibly related to Agrionemys, Lapperant de Broin et al. 2006)	MgCH/17	220	NA	NA	NA	m	n	Asia	Mlynarski, 1968: Notes on tortoises (Testudinidae) from the tertiary of Mongolia. Paleontologica Polonica, 19: 85-99	3.95
Elisabethfeld (= Elisabeth Bay) area, northern Sperrgebiet	Namibia	-26.916	15.184	northwest part of Diamond Area 1	19	20	Miocene	Burdigalian	Burdigalian	Namibchersus	namaquensis	Namibchersus namaquensis	(Stromer, 1926)	Neotypus: MSGN EF x1'2000, female carapace with plastron, still young, EF 68'00 young male, several other specimens	Holotype (Stromer, 1926) --> was destroyed during World War II	NA	240	NA	NA	m	n	Africa	Lapparent de Broin F.de, 2003: Miocene Chelonians from southern Namibia. in: B. Senut & M. Pickford coord., Faunas from the southern Namibia. Memoir Geol. Surv. Namibia 19: 67-102aus den Diamantfeldern Deutsch Südwestafrica. in: Die Diamantenwüste Südwest-Afrikas, Erich Kaiser (ed.) 2: 139-141, D. Reimer, Berlin	19.5
Elisabethfeld (= Elisabeth Bay) area, northern Sperrgebiet	Namibia	-26.916	15.184	northwest part of Diamond Area 1	19	20	Miocene	Burdigalian	Burdigalian	Namibchersus	namaquensis	Namibchersus namaquensis	(Stromer, 1926)	Neotypus: MSGN EF x1'2000, female carapace with plastron, still young, EF 68'00 young male, several other specimens	ca. 30 cm (wsl CL)	300	244	NA	still young	m	n	Africa	Lapparent de Broin F.de, 2003: Miocene Chelonians from southern Namibia. in: B. Senut & M. Pickford coord., Faunas from the southern Namibia. Memoir Geol. Surv. Namibia 19: 67-102aus den Diamantfeldern Deutsch Südwestafrica. in: Die Diamantenwüste Südwest-Afrikas, Erich Kaiser (ed.) 2: 139-141, D. Reimer, Berlin	19.5
Auchas	Namibia	-28.55	16.5	Fossil meander of the proto-Orange	18	18	Miocene	Burdigalian	Burdigalian	Namibchersus	namaquensis	Namibchersus namaquensis	(Stromer, 1926)	MSGN about 50 specimen: AM 9'93, AM 1'99, AM x, AM xa'98, AM xb'98, AM xe, AM 11'95, AM xf, AM 10'98, AM 11'98, AM 7'95, AM 2'98, AM xc, AM xd, OMS x1, OMS x	AM 1'99	254	225	NA	young male	m	n	Africa	Lapparent de Broin F.de, 2003: Miocene Chelonians from southern Namibia. in: B. Senut & M. Pickford coord., Faunas from the southern Namibia. Memoir Geol. Surv. Namibia 19: 67-102aus den Diamantfeldern Deutsch Südwestafrica. in: Die Diamantenwüste Südwest-Afrikas, Erich Kaiser (ed.) 2: 139-141, D. Reimer, Berlin	18
Auchas	Namibia	-28.55	16.5	Fossil meander of the proto-Orange	18	18	Miocene	Burdigalian	Burdigalian	Namibchersus	namaquensis	Namibchersus namaquensis	(Stromer, 1926)	MSGN about 50 specimen: AM 9'93, AM 1'99, AM x, AM xa'98, AM xb'98, AM xe, AM 11'95, AM xf, AM 10'98, AM 11'98, AM 7'95, AM 2'98, AM xc, AM xd, OMS x1, OMS x	AM 9'93	470	406	NA	large adult female	m	n	Africa	Lapparent de Broin F.de, 2003: Miocene Chelonians from southern Namibia. in: B. Senut & M. Pickford coord., Faunas from the southern Namibia. Memoir Geol. Surv. Namibia 19: 67-102aus den Diamantfeldern Deutsch Südwestafrica. in: Die Diamantenwüste Südwest-Afrikas, Erich Kaiser (ed.) 2: 139-141, D. Reimer, Berlin	18
Auchas	Namibia	-28.55	16.5	Fossil meander of the proto-Orange	18	18	Miocene	Burdigalian	Burdigalian	Namibchersus	namaquensis	Namibchersus namaquensis	(Stromer, 1926)	MSGN about 50 specimen: AM 9'93, AM 1'99, AM x, AM xa'98, AM xb'98, AM xe, AM 11'95, AM xf, AM 10'98, AM 11'98, AM 7'95, AM 2'98, AM xc, AM xd, OMS x1, OMS x	OMS x1	470	NA	NA	large adult, female?	m	n	Africa	Lapparent de Broin F.de, 2003: Miocene Chelonians from southern Namibia. in: B. Senut & M. Pickford coord., Faunas from the southern Namibia. Memoir Geol. Surv. Namibia 19: 67-102aus den Diamantfeldern Deutsch Südwestafrica. in: Die Diamantenwüste Südwest-Afrikas, Erich Kaiser (ed.) 2: 139-141, D. Reimer, Berlin	18
Auchas	Namibia	-28.55	16.5	Fossil meander of the proto-Orange	18	18	Miocene	Burdigalian	Burdigalian	Namibchersus	namaquensis	Namibchersus namaquensis	(Stromer, 1926)	MSGN about 50 specimen: AM 9'93, AM 1'99, AM x, AM xa'98, AM xb'98, AM xe, AM 11'95, AM xf, AM 10'98, AM 11'98, AM 7'95, AM 2'98, AM xc, AM xd, OMS x1, OMS x	Am xf	815	NA	NA	maximum length in Auchas, based on a posterior peripheral plate	m	n	Africa	Lapparent de Broin F.de, 2003: Miocene Chelonians from southern Namibia. in: B. Senut & M. Pickford coord., Faunas from the southern Namibia. Memoir Geol. Surv. Namibia 19: 67-102aus den Diamantfeldern Deutsch Südwestafrica. in: Die Diamantenwüste Südwest-Afrikas, Erich Kaiser (ed.) 2: 139-141, D. Reimer, Berlin	18
Arrisdrift	Namibia	-28.55	16.5	aff. Psammobates-Homopus sp. Fossil meander of the proto-Orange	17	17.5	Miocene	Burdigalian	Burdigalian	Mesocherus	orangeus	Mesocherus orangeus	Lapparent de Broin, 2003	Holotypus: MSGN AD 389'96 left epiplastron, multiple other remains	Holotypus	180	155	medium	medium sized form, CL 16 - 20 cm	mo	n	Africa	Lapparent de Broin F.de, 2003: Miocene Chelonians from southern Namibia. in: B. Senut & M. Pickford coord., Faunas from the southern Namibia. Memoir Geol. Surv. Namibia 19: 67-102aus den Diamantfeldern Deutsch Südwestafrica. in: Die Diamantenwüste Südwest-Afrikas, Erich Kaiser (ed.) 2: 139-141, D. Reimer, Berlin	17.25
Arrisdrift	Namibia	-28.55	16.5	aff. Psammobates-Homopus sp. Fossil meander of the proto-Orange	17	17.5	Miocene	Burdigalian	Burdigalian	Mesocherus	orangeus	Mesocherus orangeus	Lapparent de Broin, 2003	Holotypus: MSGN AD 389'96 left epiplastron, multiple other remains	Holotypus	160	NA	medium	medium sized form, CL 16 - 20 cm	mo	n	Africa	Lapparent de Broin F.de, 2003: Miocene Chelonians from southern Namibia. in: B. Senut & M. Pickford coord., Faunas from the southern Namibia. Memoir Geol. Surv. Namibia 19: 67-102aus den Diamantfeldern Deutsch Südwestafrica. in: Die Diamantenwüste Südwest-Afrikas, Erich Kaiser (ed.) 2: 139-141, D. Reimer, Berlin	17.25
Arrisdrift	Namibia	-28.55	16.5	aff. Psammobates-Homopus sp. Fossil meander of the proto-Orange	17	17.5	Miocene	Burdigalian	Burdigalian	Mesocherus	orangeus	Mesocherus orangeus	Lapparent de Broin, 2003	Holotypus: MSGN AD 389'96 left epiplastron, multiple other remains	Holotypus	180	NA	medium	medium sized form, CL 16 - 20 cm	mo	n	Africa	Lapparent de Broin F.de, 2003: Miocene Chelonians from southern Namibia. in: B. Senut & M. Pickford coord., Faunas from the southern Namibia. Memoir Geol. Surv. Namibia 19: 67-102aus den Diamantfeldern Deutsch Südwestafrica. in: Die Diamantenwüste Südwest-Afrikas, Erich Kaiser (ed.) 2: 139-141, D. Reimer, Berlin	17.25
Arrisdrift	Namibia	-28.55	16.5	aff. Psammobates-Homopus sp. Fossil meander of the proto-Orange	17	17.5	Miocene	Burdigalian	Burdigalian	Mesocherus	orangeus	Mesocherus orangeus	Lapparent de Broin, 2003	Holotypus: MSGN AD 389'96 left epiplastron, multiple other remains	Holotypus	200	NA	medium	medium sized form, CL 16 - 20 cm	mo	n	Africa	Lapparent de Broin F.de, 2003: Miocene Chelonians from southern Namibia. in: B. Senut & M. Pickford coord., Faunas from the southern Namibia. Memoir Geol. Surv. Namibia 19: 67-102aus den Diamantfeldern Deutsch Südwestafrica. in: Die Diamantenwüste Südwest-Afrikas, Erich Kaiser (ed.) 2: 139-141, D. Reimer, Berlin	17.25
Arrisdrift	Namibia	-28.55	16.5	aff. Psammobates-Homopus sp. Fossil meander of the proto-Orange	17	17.5	Miocene	Burdigalian	Burdigalian	Mesocherus	orangeus	Mesocherus orangeus	Lapparent de Broin, 2003	Holotypus: MSGN AD 389'96 left epiplastron, multiple other remains	Holotypus	180	NA	medium	medium sized form, CL 16 - 20 cm	mo	n	Africa	Lapparent de Broin F.de, 2003: Miocene Chelonians from southern Namibia. in: B. Senut & M. Pickford coord., Faunas from the southern Namibia. Memoir Geol. Surv. Namibia 19: 67-102aus den Diamantfeldern Deutsch Südwestafrica. in: Die Diamantenwüste Südwest-Afrikas, Erich Kaiser (ed.) 2: 139-141, D. Reimer, Berlin	17.25
Arrisdrift	Namibia	-28.55	16.5	aff. Psammobates-Homopus sp. Fossil meander of the proto-Orange	17	17.5	Miocene	Burdigalian	Burdigalian	Namibchersus	aff. namaquensis	Namibchersus aff. namaquensis	(Stromer, 1926)	MSGN old collections: PQ AD 73, PQ AD 1293, PQ AD 2789, PQ AD 3478, PQ AD 2108, PQ AD 608. new collections: pleurals: 7 remains, 2 peripherals, 2 partial humeri including AD 160'94, AD 225'94 1 partial tibia	-	NA	400	large	large species of tortoise	mo	n	Africa	Lapparent de Broin F.de, 2003: Miocene Chelonians from southern Namibia. in: B. Senut & M. Pickford coord., Faunas from the southern Namibia. Memoir Geol. Surv. Namibia 19: 67-102aus den Diamantfeldern Deutsch Südwestafrica. in: Die Diamantenwüste Südwest-Afrikas, Erich Kaiser (ed.) 2: 139-141, D. Reimer, Berlin	17.25
Arrisdrift	Namibia	-28.55	16.5	aff. Psammobates-Homopus sp. Fossil meander of the proto-Orange	17	17.5	Miocene	Burdigalian	Burdigalian	Namibchersus	aff. namaquensis	Namibchersus aff. namaquensis	(Stromer, 1926)	MSGN old collections: PQ AD 73, PQ AD 1293, PQ AD 2789, PQ AD 3478, PQ AD 2108, PQ AD 608. new collections: pleurals: 7 remains, 2 peripherals, 2 partial humeri including AD 160'94, AD 225'94 1 partial tibia	-	NA	500	large	large species of tortoise	mo	n	Africa	Lapparent de Broin F.de, 2003: Miocene Chelonians from southern Namibia. in: B. Senut & M. Pickford coord., Faunas from the southern Namibia. Memoir Geol. Surv. Namibia 19: 67-102aus den Diamantfeldern Deutsch Südwestafrica. in: Die Diamantenwüste Südwest-Afrikas, Erich Kaiser (ed.) 2: 139-141, D. Reimer, Berlin	17.25
Arrisdrift	Namibia	-28.55	16.5	aff. Psammobates-Homopus sp. Fossil meander of the proto-Orange	17	17.5	Miocene	Burdigalian	Burdigalian	Namibchersus	aff. namaquensis	Namibchersus aff. namaquensis	(Stromer, 1926)	MSGN old collections: PQ AD 73, PQ AD 1293, PQ AD 2789, PQ AD 3478, PQ AD 2108, PQ AD 608. new collections: pleurals: 7 remains, 2 peripherals, 2 partial humeri including AD 160'94, AD 225'94 1 partial tibia	-	1100	NA	large	large species of tortoise	mo	n	Africa	Lapparent de Broin F.de, 2003: Miocene Chelonians from southern Namibia. in: B. Senut & M. Pickford coord., Faunas from the southern Namibia. Memoir Geol. Surv. Namibia 19: 67-102aus den Diamantfeldern Deutsch Südwestafrica. in: Die Diamantenwüste Südwest-Afrikas, Erich Kaiser (ed.) 2: 139-141, D. Reimer, Berlin	17.25
W??e 1	Poland	52.35	22.15	Ruscinian	3.6	4.2	Pliocene	Zanclean	Zanclean	Testudo	sp.	Testudo sp.	Linnaeus, 1758	-	264	500	450	NA	NA	mo	n	Europe	M?ynarski M., 1955: Zolwie z pliocenu Polski [Tortoises from the Pliocene of Poland]. Acta Geologica Polonica 5: 161–214 (Engl. Consp., 46–62) or M?ynarski M., 1956a: On a new species of emydid-tortoise from the Pliocene of Poland. Acta Palaeontologica Polonica 1(2): 153-164 or Lapparent de Broin F. de, Bour R., Perälä J., 2006: Morphological definition of Eurotestudo (Testudinidae, Chelonii): Fi…	3.9
Belomechetskaya	Russia	44.4	41.933	lower fossil bed, N Caucasus, Kuban river eastern Paratethys stage Tshokrakian (Gabunia, 1973)	13.5	14.5	Miocene	Serravallian	Langhian	Ergilemys	sp.	Ergilemys sp.	Ckhikvadze, 1972	carapax lenght about 1 meter	-	1000	NA	NA	NA	m	n	Eurasia	FosFarBase	14
Fonelas P-1, Guadix Basin	Spain	37.417	-3.167	abundant macromammal remains	1.8	1.9	Pleistocene	Lower Pleistocene	Lower Pleistocene	Titanochelon	sp.	Titanochelon sp.	Pérez-García and Vlachos, 2014	one individual	-	1420	NA	giant	-	mo	n	Europe	Pérez-García, A., Vlachos, E., & Arribas, A. (2017). The last giant continental tortoise of Europe: A survivor in the Spanish Pleistocene site of Fonelas P-1. Palaeogeography, Palaeoclimatology, Palaeoecology.	1.85
El Lugarejo (Arévalo), Ávilla, Castilla	Spain	41.056	-4.717	Vallesian	9.5	11	Miocene	Tortonian	Tortonian	Cheirogaster	sp.	Cheirogaster sp.	Bergounioux, 1935	shell	-	1170	NA	giant	un nuevo ejemplar de tortuga gigante	m	n	Europe	Jiménez Fuentes, E., Acosta, P., & Fincias San Martín, B. (1986). Un nuevo ejemplar de tortuga gigante del Mioceno de Arévalo (Ávila). Studia Geologica. Salmanticensia, 23, 11.	10.25
Sima del Elefante TE14, Sierra de Atapuerca, Burgos	Spain	42.33	-3.51	Trinchera Elefante Lower Red Unit (TE-LRU) Atapuerca Faunal Unit 1, Allophaiomys lavocati Biozone lithic tools, cut marks on the tortoise remains	1.06	1.38	Pleistocene	Lower Pleistocene	Lower Pleistocene	Eurotestudo	hermanni	Testudo hermanni	(Gmelin, 1789)	TE14: 2 pleurals, 1 suprapygal, TE14a: 1 neural, 2 pleurals, TE14b: 1 hyoplastron, TE14c: 1 nuchal, 2 neurals, 9 pleurals, 4 peripherals, 2 epiplastrons, 2 entoplastrons, 2 hyoplastrons, 7 hypoplastrons, 2 xiphiplastrons	-	NA	121	NA	NA	mf	n	Europe	Blasco R., Blain H.A., Rosell J., Díez J.C., Huguet R., Rodríguez J., Arsuga J.L., Bermúdez de Castro J.M., Carbonell E., 2011: Earliest evidence for human consumption of tortoises in the European Early Pleistocene from Sima del Elefante, Sierra de Atapuerca, Spain. Journal of Human Evolution doi:10.1016/jhevol.2011.06.002	1.22
Tha Chang area, Chaloem Pra Kiat district, Nakhon Ratchasima Province	Thailand	14.987	102.335	possibly most of the deposition was Pleistocene	1	5	Pleistocene/Pliocene	Lower Pleistocene	Zanclean	Aldabrachelys	? sp.	Aldabrachelys ? sp.	Loveridge & Williams, 1975	RIN-862 epiplastral process, RIN-543 nuchal plate	-	1500	NA	NA	2 individuals, CL = 1.5 m	mo	n	Asia	Claude J., Naksri W., Boonchai N., Buffetaut E., Duangkrayom J., Laojumpon C., Jintasakul P., Lauprasert K., Martin J., Sutheethorn V., Tong H., 2011: Neogene reptiles of northeastern Thailand and their paleogeographical significance. Annales de Paléontologie (2011) doi:10.1016/j.annpal.2011.08.002	3
Tha Chang area, Chaloem Pra Kiat district, Nakhon Ratchasima Province	Thailand	14.987	102.335	possibly most of the deposition was Pleistocene	1	5	Pleistocene/Pliocene	Lower Pleistocene	Zanclean	Aldabrachelys	? sp.	Aldabrachelys ? sp.	Loveridge & Williams, 1975	RIN-862 epiplastral process, RIN-543 nuchal plate	-	1500	NA	NA	2 individuals, CL = 1.5 m	mo	n	Asia	Claude J., Naksri W., Boonchai N., Buffetaut E., Duangkrayom J., Laojumpon C., Jintasakul P., Lauprasert K., Martin J., Sutheethorn V., Tong H., 2011: Neogene reptiles of northeastern Thailand and their paleogeographical significance. Annales de Paléontologie (2011) doi:10.1016/j.annpal.2011.08.002	3
Leisey Shell Pit 1A, Hillsborough County, Florida	USA	27.7	-82.5	late early Irvingtonian	1	1.5	Pleistocene	Lower Pleistocene	Lower Pleistocene	Hesperotestudo	crassiscutata	Hesperotestudo crassiscutata	(Leidy, 1889)	UF 64395, 65005, 80593, 84300, 65052-54, 68928, 80676. 80593, 83602, 84007, 84066, 84299, 84301, 84311, 81925, 64396, 68933, 81486, 68919, 84024-25, 64398, 65051, 88126 diverse remains	80593	NA	510	small	small (subgenus Hesperotestudo) lines	m	n	N-America	Meylan P.A., 1995: Pleistocene amphibians and reptiles from the Leisey Shell Pit, Hillsborough County, Florida. Florida Museum Natural History 37(Part I, 9): 273-297 or Morgan G.S., Emslie S.D., 2010: Tropical and western in?uences in vertebrate faunas from the Pliocene and Pleistocene of Florida. Quaternary International 217: 143-158 or MacFadden B.J., 1995: Magnetic polarity stratigraphy and co…	1.25
Arredondo IIA, Alachua County, Florida	USA	29.6	-82.4	Illinoian or Kansan according to Lynch 1965	0.012	0.126	Pleistocene	Upper Pleistocene	Upper Pleistocene	Hesperotestudo	incisa	Hesperotestudo incisa	(Hay, 1916)	-	7 specimens: 192.0-264.0 mm (mean=211.6 mm)	NA	211.6	NA	NA	m	n	N-America	Holman J.A., 1972b: Amphibian and Reptiles. in: M.F. Skinner & C.W. Hibbard (eds.) Early Pleistocene periglacial and glacial rocks and faunas of north-central Nebraska. Bulletin of the American Museum of Natural History 148(1): 55-71	0.069
McGehee Farm near Newberry, Alachua County, Florida	USA	29.7	-82.6	Alachua Formation	10.9	11	Miocene	Tortonian	Tortonian	Hesperotestudo	alleni	Hesperotestudo alleni	(Auffenbgerg, 1996)	Holotypus: UF 9370 a shell	UF 9370	NA	219	NA	NA	m	n	N-America	Holman J.A., 1972b: Amphibian and Reptiles. in: M.F. Skinner & C.W. Hibbard (eds.) Early Pleistocene periglacial and glacial rocks and faunas of north-central Nebraska. Bulletin of the American Museum of Natural History 148(1): 55-71	10.95
Thomas Farm Local Fauna, Gilchrist County, Florida	USA	29.7	-82.6	a sinkhole lake that then collapsed into a larger underground chamber earliest Hemmingfordian North American Land Mammal Age (NALMA) only Holman 1965, not Holman 2003: Leptodactylus abavus Holman, J. A. 1965. Quarterly Journal of the Florida Academy of Sciences 28(1):70-72, fig. 1. (Anura: Leptodactylidae; early Miocene). Holotype: UF 10201. Rana bucella, Holman, J. A. 1965. Quarterly Journal of …	18	19	Miocene	Burdigalian	Burdigalian	Geochelone	tedwhitei	Geochelone tedwhitei	(Williams, 1953)	Holotypus: MCZ 2020 a complete plastron, ref.mat.: MCZ 2021-2024 plastra, 2025-2026 fragmentary carapaces	MCZ 2020	370	NA	NA	CL: 370 mm, CW: 300 mm, CH approx. 150 mm	m	n	N-America	Williams E., 1953: A new fossil tortoise from the Thomas Farm Miocene of Florida. Bulletin of the Museum of Comparative Zoology 107(11): 537-552 or Williams M.J., 2009: Miocene herpetofaunas from the central Gulf Coast USA: their paleoecology, biogeography, and biostratigraphy. Thesis Louisiana State University and Agricultural and Mechanical College, Department of Geology and Geophysics, 152pp	18.5
Thomas Farm Local Fauna, Gilchrist County, Florida	USA	29.7	-82.6	a sinkhole lake that then collapsed into a larger underground chamber earliest Hemmingfordian North American Land Mammal Age (NALMA) only Holman 1965, not Holman 2003: Leptodactylus abavus Holman, J. A. 1965. Quarterly Journal of the Florida Academy of Sciences 28(1):70-72, fig. 1. (Anura: Leptodactylidae; early Miocene). Holotype: UF 10201. Rana bucella, Holman, J. A. 1965. Quarterly Journal of …	18	19	Miocene	Burdigalian	Burdigalian	Geochelone	tedwhitei	Geochelone tedwhitei	(Williams, 1953)	Holotypus: MCZ 2020 a complete plastron, ref.mat.: MCZ 2021-2024 plastra, 2025-2026 fragmentary carapaces	MCZ 2021	NA	400	NA	several specimens: not exceeding 400 mm in PL	m	n	N-America	Williams E., 1953: A new fossil tortoise from the Thomas Farm Miocene of Florida. Bulletin of the Museum of Comparative Zoology 107(11): 537-552 or Williams M.J., 2009: Miocene herpetofaunas from the central Gulf Coast USA: their paleoecology, biogeography, and biostratigraphy. Thesis Louisiana State University and Agricultural and Mechanical College, Department of Geology and Geophysics, 152pp	18.5
North Cita Canyon (Middle Stratum), Randall County, Texas	USA	34.9	-101.6	poorly lithified, coarse-grained, brown sandstone	1.8	3.6	Pleistocene/Pliocene	Gelasian	Piacencian	Gopherus	canyonensis	Gopherus canyonensis	(Johnston, 1937)	Holotypus: TPPHM 1534 almost complete skeleton lacking most of the carapace	TPPHM 1534	NA	805	NA	NA	m	n	N-America	Johnston C.S., 1937: Osteology of Bysmachelys canyonensis a new turtle from the Pliocene of Texas. Journal of Paleontology 45(4): 439-447	2.7
Iron Canyon Fauna, Mojave Desert, Kern County, California	USA	35.3	-118.5	Dove Spring Formation, Cerrotejonian, Clarendonian (CL1, CL2)	11.2	12.5	Miocene	Tortonian	Serravallian	Gopherus	? sp.	Gopherus ? sp.	Rafinesque, 1832	-	several specimens, no exact number given	500	NA	NA	Tortoises (Geochelone sp. and ?Gopherus sp. with carapaces up to 0.5 m in length are found throughout the section	m	n	N-America	Whistler D.P., Tedford R.H., Takeuchi G.T., Wang X., Tseng Z., Perkins M.E., 2009: Revised Miocene biostratigraphy and biochronology of the Dove Spring Formation, Mojave Desert, California. in: Albright L.B. (ed.) Papers on Geology, Vertebrate Paleontology, and Biostratigraphy in Honor of Michael O. Woodburne. Museum of Northern Arizona Bulletin 65: 331-362	11.85
Ricardo Fauna, Mojave Desert, Kern County, California	USA	35.3	-118.5	Dove Spring Formation, Montediablan, Clarendonian (CL2, CL3)	9	11.2	Miocene	Tortonian	Tortonian	Geochelone	sp.	Geochelone sp.	Fitzinger, 1835	-	several specimens, no exact number given	500	NA	NA	Tortoises (Geochelone sp. and ?Gopherus sp. with carapaces up to 0.5 m in length are found throughout the section	m	n	N-America	Whistler D.P., Tedford R.H., Takeuchi G.T., Wang X., Tseng Z., Perkins M.E., 2009: Revised Miocene biostratigraphy and biochronology of the Dove Spring Formation, Mojave Desert, California. in: Albright L.B. (ed.) Papers on Geology, Vertebrate Paleontology, and Biostratigraphy in Honor of Michael O. Woodburne. Museum of Northern Arizona Bulletin 65: 331-362	10.1
Ricardo Fauna, Mojave Desert, Kern County, California	USA	35.3	-118.5	Dove Spring Formation, Montediablan, Clarendonian (CL2, CL3)	9	11.2	Miocene	Tortonian	Tortonian	Gopherus	? sp.	Gopherus ? sp.	Rafinesque, 1832	-	several specimens, no exact number given	500	NA	NA	Tortoises (Geochelone sp. and ?Gopherus sp. with carapaces up to 0.5 m in length are found throughout the section	m	n	N-America	Whistler D.P., Tedford R.H., Takeuchi G.T., Wang X., Tseng Z., Perkins M.E., 2009: Revised Miocene biostratigraphy and biochronology of the Dove Spring Formation, Mojave Desert, California. in: Albright L.B. (ed.) Papers on Geology, Vertebrate Paleontology, and Biostratigraphy in Honor of Michael O. Woodburne. Museum of Northern Arizona Bulletin 65: 331-362	10.1
Lee Creek Mine, Yorktown Sample, Beaufort County, North Carolina	USA	35.4	-76.8	Yorktown Formation muddy sand	4	5	Pliocene	Zanclean	Zanclean	Geochelone	sp.	Geochelone sp.	Fitzinger, 1835	USNM 336458 complete shell	CL: 88 cm, PL: 70 cm	880	700	large	large	m	n	N-America	Zug G.R., 2001: Turtles of the Lee Creek Mine (Pliocene: North Carolina). Smithsonian Contributions to Paleobiology 90: 203-218 or Ray C.E., Bohaska D.J., 2001: Geology and Paleontology of the Lee Creek Mine, North Carolina, III. Smithsonian Contributions to Paleobiology 90, 365 pages, 127 figures, 45 plates, 32 tables	4.5
Sawrock Canyon local fauna, Seward County, Kansas	USA	37	-100	XI Member of lower part of the Rexroad Formation	3	3	Pliocene	Piacencian	Piacencian	Hesperotestudo	riggsi	Hesperotestudo riggsi	(Hibbard, 1944)	Holotypus: KUMVP 6789 nearly complete carapace and plastron, Paratypus: KUMVP 6790 complete plastron, nearly complete carapace, parts of skeletal elements (both from Locality No. 6)	KUMVP 6789	176	189	NA	Holotype KUMVP 6789: CL: 176 mm(, C width: 155 mm, C height: 85 mm), PL: 189 mm(, P width: 140 mm)	m	n	N-America	Hibbard C.W., 1944: A new land tortoise, Testudo riggsi, from the Middle Pliocene of Seward County, Kansas. The University of Kansas Science Bulletin 30(7): 71-76	3
Sawrock Canyon local fauna, Seward County, Kansas	USA	37	-100	XI Member of lower part of the Rexroad Formation	3	3	Pliocene	Piacencian	Piacencian	Hesperotestudo	riggsi	Hesperotestudo riggsi	(Hibbard, 1944)	Paratype	KUMVP 6790	185	NA	NA	Paratype KUMVP 6790: CL: 185 mm(, CW 165 mm)	m	n	N-America	Hibbard C.W., 1944: A new land tortoise, Testudo riggsi, from the Middle Pliocene of Seward County, Kansas. The University of Kansas Science Bulletin 30(7): 71-76	3
Cragin Quarry Local Fauna, Meade County, Kansas	USA	37.2242	-100.418	Rancholabrean	0.3	0.3	Pleistocene	Middle Pleistocene	Middle Pleistocene	Hesperotestudo	equicomes	Hesperotestudo equicomes	(Hay, 1917)	Holotypus: NMNH 10944 (cast UMMP V31427) right epiplastron, left hyoplastral fragment, ref.mat.: KU 4899 partial carapace and plastron, limb bones and dermal ossicles, UMMP V37172 left humerus, V38640 dermal ossicles from limb armor	NMNH 10944	340	NA	medium to large	medium to large-sized Hesperotestudo, smaller than G. oelrichi; exact CL from fossil checklist	ev	n	N-America	Holman J.A., 1972b: Amphibian and Reptiles. in: M.F. Skinner & C.W. Hibbard (eds.) Early Pleistocene periglacial and glacial rocks and faunas of north-central Nebraska. Bulletin of the American Museum of Natural History 148(1): 55-71	0.3
UCMP V71137, Turlock Lake 10, Stanislaus County, California	USA	37.6	-120.6	Upper Mehrten Formation, Modesto Reservoir Member, Hemphillian	5	6	Pliocene/Miocene	Zanclean	Messinian	Hesperotestudo	orthopygia	Hesperotestudo orthopygia	(Cope, 1878)	UCMP 132086 xiphiplastron, 134831 costal 8, peripheral fragment, 137148 costal, 95918 peripheral, costal fragment	UCMP 95918	1200	NA	NA	NA	mo	n	N-America	Biewer J., Sankey J., Hutchison H., Garber D., 2016: A fossil giant tortoise from the Mehrten Formation of Northern California. PaleoBios 33: 1-13 or Brattstrom B.H., 1961: Some new fossil tortoises from western North America with remarks on the zoogeography and paleoecology of tortoises. Journal of Paleontology 35(3): 543-560	5.5
UCMP V81248, Turlock Lake 11, Stanislaus County, California	USA	37.6	-120.6	Upper Mehrten Formation, Modesto Reservoir Member, Hemphillian	5	6	Pliocene/Miocene	Zanclean	Messinian	Hesperotestudo	orthopygia	Hesperotestudo orthopygia	(Cope, 1878)	UCMP 131793 incomplete juvenile shell, 131794 anterior plastron, 132087 peripheral fragments, 134830 posterior plastron	UCMP 131794	NA	620	NA	NA	mo	n	N-America	Biewer J., Sankey J., Hutchison H., Garber D., 2016: A fossil giant tortoise from the Mehrten Formation of Northern California. PaleoBios 33: 1-13	5.5
UCMP V-3952, Ingram Creek site 8, Stanislaus County, California	USA	37.6	-120.8	San Pablo Formation, Clarendonian	9	10	Miocene	Tortonian	Tortonian	Hesperotestudo	sp.	Hesperotestudo sp.	Williams, 1950	UCMP 36080 many fragments of the shell and limbs	UCMP 36080	1200	NA	NA	very large (comparable to specimens from Mehrten Formation)	ev	n	N-America	Biewer J., Sankey J., Hutchison H., Garber D., 2016: A fossil giant tortoise from the Mehrten Formation of Northern California. PaleoBios 33: 1-13	9.5
Santee, Knox County, Nebraska	USA	42	-97	Late Hemphillian	4.8	5.2	Pliocene	Zanclean	Zanclean	Geochelone	sp.	Geochelone sp.	Fitzinger, 1835	UNSM 56964, 56965 one nuchal, one neural, nine coastal fragments, six peripherals, three epiplastra, one left xiphiplastron, four plastral fragments	Santee Type B	NA	160	NA	NA	e	n	N-America	Parmley D., 1992a: Turtles from the late Hemphillian (latest Miocene) of Knox County, Nebraska. The Texas Journal of Science 44(3): 339–348 or Parmley D., Holman J.A., 1995: Hemphillian (late Miocene) snakes from Nebraska, with comments on Arikareean through Blancan snakes of midcontinental North America. Journal of Vertebrate Paleontology 15: 79-95	5
Sand Draw local fauna, Brown County, Nebraska	USA	42.7	-100	Blancan also known as: UNSM Sand Draw locality; Frick Prospecting Locality 277; Magill; Owl Pellet; UM-Neb. sites 1-66, 2-66, 2-67, 4-67, 5-67, 1-68	3	3	Pliocene	Piacencian	Piacencian	Hesperotestudo	oelrichi	Hesperotestudo oelrichi	Holman, 1972	Holotypus: UMMP V56298 almost complete specimen, Paratypes: UMMP V59919 one fragmentary nuchal, 59923 one hypoplastron, two plastral, two carapace fragments, 59924 three peripherals, two costals, 56437 large piece of shell, 56442 one costal...and FAM	UMMP V56298	NA	258	large	G. oelrichi is among the largest of the Geochelone (Hesperotestudo) turgida group	m	n	N-America	Preston R.E., 1979: Late Pleistocene cold-blooded vertebrate faunas from the mid-continental United States. I. Reptilia: Testudines, Crocodilia. Papers on Paleontology 19, Claude W. Hibbard Memorial Volume 6: 1-53	3
Alcalá de Henares, Cerro del Viso (Barranco de los Mártires y Santos de la Humosa), Madrid	Spain	40.4882	-3.3134	Astaracian	14	16	Miocene	Langhian	Langhian	Titanochelon	bolivari	Titanochelon bolivari	(Hernández Pacheco, 1917)	Lectotypus: MNCN most of shell and numerous appendicular elements (41 remains with different collection numbers), Paralectotypus: MNCN numerous appendicular elements, some caudal vertebrae (8 remains), ref.mat.: 234 diverse remains	Alcalá 2	1250	1100	NA	NA	mo	n	Europe	Pérez-García A., Vlachos E., 2014: New generic proposal for the European Neogene large testudinids (Cryptodira) and the ?rst phylogenetic hypothesis for the medium and large representatives of the European Cenozoic record. Zoological Journal of the Linnean Society 172: 653-719	15
Vallecas, Madrid	Spain	40.3815	-3.6224	Orleanian	14	16	Miocene	Langhian	Langhian	Titanochelon	bolivari	Titanochelon bolivari	(Hernández Pacheco, 1971)	MNCN 73209, 73210 cervical vertebrae, 73211 acromion, 73212 coracoid, 73213 plastron, 73214 carapace	-	NA	1000	NA	NA	mo	n	Europe	Pérez-García A., Vlachos E., 2014: New generic proposal for the European Neogene large testudinids (Cryptodira) and the ?rst phylogenetic hypothesis for the medium and large representatives of the European Cenozoic record. Zoological Journal of the Linnean Society 172: 653-719	15
Cerro del Otero, Palencia	Spain	42.0101	-4.5287	Aragonian	12	13	Miocene	Serravallian	Serravallian	Titanochelon	bolivari	Titanochelon bolivari	(Hernández Pacheco, 1971)	abundant diverse remains with MNCN collection numbers	ACN 6665	NA	1230	NA	NA	mo	n	Europe	Pérez-García A., Vlachos E., 2014: New generic proposal for the European Neogene large testudinids (Cryptodira) and the ?rst phylogenetic hypothesis for the medium and large representatives of the European Cenozoic record. Zoological Journal of the Linnean Society 172: 653-719	12.5
Hostalets de Piérola, Barcelone province, Cataluña, Vallés-Penedés basin	Spain	41.5349	1.7685	Late Aragonian to Early Vallesian	9.7	11.1	Miocene	Tortonian	Tortonian	Cheirogaster	richardi	Cheirogaster richardi	(Bergounioux, 1938)	plastron (=synonym of Titanochelon bolivari (Hern?dez-Pacheco, 1917 in Pérez-García & Vlachos 2014)	Holotype \Cheirogaster richardi\""	NA	1050	NA	NA	mo	n	Europe	Pérez-García A., Vlachos E., 2014: New generic proposal for the European Neogene large testudinids (Cryptodira) and the ?rst phylogenetic hypothesis for the medium and large representatives of the European Cenozoic record. Zoological Journal of the Linnean Society 172: 653-719	10.4
Sawmill Sink, Abaco	Bahamas	26.2833	-77.2	-	2.583	3.82	Holocene	Late Holocene	Late Holocene	Chelonoidis	alburyorum	Chelonoidis alburyorum	Franz and Franz, 2009	5 individuals (including 1 subadult)	Holotype NMB.AB50.T1	453	354	moderate	male, PLmid = 345, CH = 224	m	y	C-America	Franz, R., & Franz, S. E. (2009). A new fossil land tortoise in the genus Chelonoidis (Testudines: Testudinidae) from the Northern Bahamas: with an osteological assessment of other neotropical tortoises. University of Florida.	3.2015
Sawmill Sink, Abaco	Bahamas	26.2833	-77.2	-	2.583	3.82	Holocene	Late Holocene	Late Holocene	Chelonoidis	alburyorum	Chelonoidis alburyorum	Franz and Franz, 2009	5 individuals (including 1 subadult)	NMB.AB50.T2	466	368	moderate	Male, PLmid = 359, CH=229	m	y	C-America	Franz, R., & Franz, S. E. (2009). A new fossil land tortoise in the genus Chelonoidis (Testudines: Testudinidae) from the Northern Bahamas: with an osteological assessment of other neotropical tortoises. University of Florida.	3.2015
Sawmill Sink, Abaco	Bahamas	26.2833	-77.2	-	2.583	3.82	Holocene	Late Holocene	Late Holocene	Chelonoidis	alburyorum	Chelonoidis alburyorum	Franz and Franz, 2009	5 individuals (including 1 subadult)	NMB.AB50.T3	428	347	moderate	female, PLmid = 335, CH = 215	m	y	C-America	Franz, R., & Franz, S. E. (2009). A new fossil land tortoise in the genus Chelonoidis (Testudines: Testudinidae) from the Northern Bahamas: with an osteological assessment of other neotropical tortoises. University of Florida.	3.2015
Sawmill Sink, Abaco	Bahamas	26.2833	-77.2	-	2.583	3.82	Holocene	Late Holocene	Late Holocene	Chelonoidis	alburyorum	Chelonoidis alburyorum	Franz and Franz, 2009	5 individuals (including 1 subadult)	NMB.AB50.T7	424	338	moderate	male, PLmid = 328, CH = 218	m	y	C-America	Franz, R., & Franz, S. E. (2009). A new fossil land tortoise in the genus Chelonoidis (Testudines: Testudinidae) from the Northern Bahamas: with an osteological assessment of other neotropical tortoises. University of Florida.	3.2015
Bayaguana, Los Haitises, San Cristobal	Hispaniola, Dominican Republic	18.7449	-69.6368	-	0.012	0.126	Pleistocene	Late Pleistocene	Late Pleistocene	Chelonoidis	sp.	Chelonoidis sp.	(Franz and Woods, 1983)	6 individuals, but only estimated size for 1	UF 26100	600	NA	NA	We estimate that the carapacial length of this individual was approximately 600, based on comparisons with specimens of recent Geochelone of known size.	mo	y	C-America	Franz, R., & Woods, C. A. (1983). A fossil tortoise from Hispaniola. Journal of Herpetology, 17(1), 79-81.	0.069
Indian Cave, Middle Caicos	Turks and Caicos	21.831	-71.808	-	0.001	0.001	Holocene	Late Holocene	Late Holocene	Chelonoidis	sp.	Chelonoidis sp.	(Franz et al., 2001)	several individuals (no exact number)	-	512	NA	NA	estimated by original authors based on humerus/femur-lengths in comparison to extant Chelonoidis species	mo	y	C-America	Franz, R., Carlson, L. A., Owen, R. D., & Steadman, D. (2001). Fossil tortoises from the Turks and Caicos Islands, BWI. In Proceedings of the 8th Symposium on the Natural History of the Bahamas. Gerace Research Center, San Salvador, Bahamas (pp. 27-31).	0.001
Indian Cave, Middle Caicos	Turks and Caicos	21.831	-71.808	-	0.001	0.001	Holocene	Late Holocene	Late Holocene	Chelonoidis	sp.	Chelonoidis sp.	(Franz et al., 2001)	several individuals (no exact number)	-	854	NA	NA	estimated by original authors based on humerus/femur-lengths in comparison to extant Chelonoidis species	mo	y	C-America	Franz, R., Carlson, L. A., Owen, R. D., & Steadman, D. (2001). Fossil tortoises from the Turks and Caicos Islands, BWI. In Proceedings of the 8th Symposium on the Natural History of the Bahamas. Gerace Research Center, San Salvador, Bahamas (pp. 27-31).	0.001
Coralie, Grand Turk	Turks and Caicos	21.5035	-71.1404	-	0.001	0.001	Holocene	Late Holocene	Late Holocene	Chelonoidis	sp.	Chelonoidis sp.	(Carlson, 1999)	18 individuals		NA	400	NA	estimated from limb bone size	mo	y	C-America	Carlson, L. A. (2000). Aftermath of a feast: Human colonization of the southern Bahamian archipelago and its effects on the indigenous fauna.	0.001
Coralie, Grand Turk	Turks and Caicos	21.5035	-71.1404	-	0.001	0.001	Holocene	Late Holocene	Late Holocene	Chelonoidis	sp.	Chelonoidis sp.	(Carlson, 1999)	18 individuals		NA	600	NA	estimated from limb bone size	mo	y	C-America	Carlson, L. A. (2000). Aftermath of a feast: Human colonization of the southern Bahamian archipelago and its effects on the indigenous fauna.	0.001
Coralie, Grand Turk	Turks and Caicos	21.5035	-71.1404	-	0.001	0.001	Holocene	Late Holocene	Late Holocene	Chelonoidis	sp.	Chelonoidis sp.	(Carlson, 1999)	18 individuals		NA	500	NA	accurate in situ measurement	m	y	C-America	Carlson, L. A. (2000). Aftermath of a feast: Human colonization of the southern Bahamian archipelago and its effects on the indigenous fauna.	0.001
Coralie, Grand Turk	Turks and Caicos	21.5035	-71.1404	-	0.001	0.001	Holocene	Late Holocene	Late Holocene	Chelonoidis	sp.	Chelonoidis sp.	(Carlson, 1999)	18 individuals		NA	500	NA	estimated from neural size	mo	y	C-America	Carlson, L. A. (2000). Aftermath of a feast: Human colonization of the southern Bahamian archipelago and its effects on the indigenous fauna.	0.001
Santa Clara	Cuba	22.4603	-79.9553	-	0.006	0.781	Holocene/Pleistocene	Holocene	Late Pleistocene	Chelonoidis	cubensis	Chelonoidis cubensis	Leidy, 1868	-	AMNH 6242	1139	NA	large	estimated from femur length (14 cm) using ratio provided in Franz et al., 2001	ef	y	C-America	Williams, E. E. (1950). Testudo cubensis and the evolution of western hemisphere tortoises. Bulletin of the AMNH; v. 95, article 1.	0.3935
Sombrero Island	Sombrero Island (Anguilla)	18.5889	-63.426	-	0.012	0.126	Pleistocene	Late Pleistocene	Late Pleistocene	Chelonoidis	sombrerensis	Chelonoidis sombrerensis	Leidy, 1868	-	-	NA	900	large	-	m	y	C-America	Carlson, L. A. (2000). Aftermath of a feast: Human colonization of the southern Bahamian archipelago and its effects on the indigenous fauna.	0.069
Navassa Island	Navassa	18.4083	-75.0107	-	0.012	0.126	Pleistocene	Late Pleistocene	Late Pleistocene	Chelonoidis	sp.	Chelonoidis sp.	Auffenberg, 1967	-	-	400	NA	moderate	-	mo	y	C-America	Auffenberg, W. (1967). Notes on West Indian tortoises. Herpetologica, 23(1), 34-44.	0.069
Cueva del Papayo, Pedernales	Hispaniola, Dominican Republic	17.8544	71.4997	-	0.012	0.126	Pleistocene	Late Pleistocene	Late Pleistocene	Chelonoidis	marcanoi	Chelonoidis marcanoi	Turvey et al., 2017	7 individuals	NHMUK PV R 36954	778	NA	giant	estimated from humerus lengths using ratio from Franz et al, 2001	eh	y	C-America	Turvey, S. T., Almonte, J., Hansford, J., Scofield, R. P., Brocca, J. L., & Chapman, S. D. (2017). A new species of extinct Late Quaternary giant tortoise from Hispaniola. Zootaxa, 4277(1), 1-16.	0.069
Cueva del Papayo, Pedernales	Hispaniola, Dominican Republic	17.8544	71.4997	-	0.012	0.126	Pleistocene	Late Pleistocene	Late Pleistocene	Chelonoidis	marcanoi	Chelonoidis marcanoi	Turvey et al., 2017	7 individuals	MNHNSD FOS 23.1054	767	NA	giant	estimated from humerus lengths using ratio from Franz et al, 2001	eh	y	C-America	Turvey, S. T., Almonte, J., Hansford, J., Scofield, R. P., Brocca, J. L., & Chapman, S. D. (2017). A new species of extinct Late Quaternary giant tortoise from Hispaniola. Zootaxa, 4277(1), 1-16.	0.069
Cueva del Papayo, Pedernales	Hispaniola, Dominican Republic	17.8544	71.4997	-	0.012	0.126	Pleistocene	Late Pleistocene	Late Pleistocene	Chelonoidis	marcanoi	Chelonoidis marcanoi	Turvey et al., 2017	7 individuals	MNHNSD FOS 23.1057	530	NA	giant	estimated from humerus lengths using ratio from Franz et al, 2001	eh	y	C-America	Turvey, S. T., Almonte, J., Hansford, J., Scofield, R. P., Brocca, J. L., & Chapman, S. D. (2017). A new species of extinct Late Quaternary giant tortoise from Hispaniola. Zootaxa, 4277(1), 1-16.	0.069
Cueva del Papayo, Pedernales	Hispaniola, Dominican Republic	17.8544	71.4997	-	0.012	0.126	Pleistocene	Late Pleistocene	Late Pleistocene	Chelonoidis	marcanoi	Chelonoidis marcanoi	Turvey et al., 2017	7 individuals	MNHNSD FOS 23.1058	614	NA	giant	estimated from humerus lengths using ratio from Franz et al, 2001	eh	y	C-America	Turvey, S. T., Almonte, J., Hansford, J., Scofield, R. P., Brocca, J. L., & Chapman, S. D. (2017). A new species of extinct Late Quaternary giant tortoise from Hispaniola. Zootaxa, 4277(1), 1-16.	0.069
Pauk Twonship	Myanmar	21.4553	94.5153	Lower Irrawady Beds	3.6	7.246	Miocene/Pliocene	Early Pliocene	Upper Miocene	Megalochelys	atlas	Megalochelys atlas	Falconer and Cautley, 1844	-	-	1800	NA	giant	nearly complete shell (young male)	m	n	Asia	Hirayama, R., Sonoda, T., Takai, M., Htike, T., Thein, Z. M. M., & Takahashi, A. (2015). Megalochelys: gigantic tortoise from the Neogene of Myanmar (No. e1185). PeerJ PrePrints.	5.423
Pauk Twonship	Myanmar	21.4553	94.5153	Lower Irrawady Beds	3.6	7.246	Miocene/Pliocene	Early Pliocene	Upper Miocene	Megalochelys	atlas	Megalochelys atlas	Falconer and Cautley, 1844	-	-	2100	NA	giant	based in humerus length = 75 cm	mo	n	Asia	Hirayama, R., Sonoda, T., Takai, M., Htike, T., Thein, Z. M. M., & Takahashi, A. (2015). Megalochelys: gigantic tortoise from the Neogene of Myanmar (No. e1185). PeerJ PrePrints.	5.423
Java Island	Indonesia	-7.2889	109.522	-	0.781	2.588	Pleistocene	Lower Pleistocene	Lower Pleistocene	Megalochelys	sp.	Megalochelys sp.	Falconer and Cautley, 1844	-	-	2000	NA	giant	-	m	y	Asia	Hirayama, R., Sonoda, T., Takai, M., Htike, T., Thein, Z. M. M., & Takahashi, A. (2015). Megalochelys: gigantic tortoise from the Neogene of Myanmar (No. e1185). PeerJ PrePrints.	1.6845
Reddick IA+B, Marion County, Florida	USA	29.1	-82.3	late Rancholabrean	0.012	0.126	Pleistocene	Upper Pleistocene	Upper Pleistocene	Hesperotestudo	crassiscutata	Hesperotestudo crassiscutata	(Leidy, 1889)	(=Testudo sellardsi Hay, 1916)	UF 2480	NA	259	NA	NA	m	n	N-America	Auffenberg, W. (1963). Fossil testudinine turtles of Florida, genera Geochelone and Floridemys. University of Florida.	0.069
Reddick IA+B, Marion County, Florida	USA	29.1	-82.3	late Rancholabrean	0.012	0.126	Pleistocene	Upper Pleistocene	Upper Pleistocene	Hesperotestudo	crassiscutata	Hesperotestudo crassiscutata	(Leidy, 1889)	(=Testudo sellardsi Hay, 1916)	UF 2397	NA	257	NA	NA	m	n	N-America	Auffenberg, W. (1963). Fossil testudinine turtles of Florida, genera Geochelone and Floridemys. University of Florida.	0.069
Reddick IA+B, Marion County, Florida	USA	29.1	-82.3	late Rancholabrean	0.012	0.126	Pleistocene	Upper Pleistocene	Upper Pleistocene	Hesperotestudo	crassiscutata	Hesperotestudo crassiscutata	(Leidy, 1889)	(=Testudo sellardsi Hay, 1916)	UF 2420	NA	164	NA	NA	m	n	N-America	Auffenberg, W. (1963). Fossil testudinine turtles of Florida, genera Geochelone and Floridemys. University of Florida.	0.069
Haile, Alachua County, Florida	USA	29.8	-82.1	-	0.012	2.588	Pleistocene	Pleistocene	Pleistocene	Hesperotestudo	incisa	Hesperotestudo incisa	(Hay, 1916)	-	UF 3462	NA	264	NA	NA	m	n	N-America	Auffenberg, W. (1963). Fossil testudinine turtles of Florida, genera Geochelone and Floridemys. University of Florida.	1.3
Haile, Alachua County, Florida	USA	29.8	-82.1	-	0.012	2.588	Pleistocene	Pleistocene	Pleistocene	Hesperotestudo	incisa	Hesperotestudo incisa	(Hay, 1916)	-	UF 3141	241	205	NA	NA	m	n	N-America	Auffenberg, W. (1963). Fossil testudinine turtles of Florida, genera Geochelone and Floridemys. University of Florida.	1.3
Haile, Alachua County, Florida	USA	29.8	-82.1	-	0.012	2.588	Pleistocene	Pleistocene	Pleistocene	Hesperotestudo	incisa	Hesperotestudo incisa	(Hay, 1916)	-	UF 3077	231	214	NA	NA	m	n	N-America	Auffenberg, W. (1963). Fossil testudinine turtles of Florida, genera Geochelone and Floridemys. University of Florida.	1.3
Haile, Alachua County, Florida	USA	29.8	-82.1	-	0.012	2.588	Pleistocene	Pleistocene	Pleistocene	Hesperotestudo	incisa	Hesperotestudo incisa	(Hay, 1916)	-	UF 3073	228	204	NA	NA	m	n	N-America	Auffenberg, W. (1963). Fossil testudinine turtles of Florida, genera Geochelone and Floridemys. University of Florida.	1.3
Haile, Alachua County, Florida	USA	29.8	-82.1	-	0.012	2.588	Pleistocene	Pleistocene	Pleistocene	Hesperotestudo	incisa	Hesperotestudo incisa	(Hay, 1916)	-	UF 3029	224	206	NA	NA	m	n	N-America	Auffenberg, W. (1963). Fossil testudinine turtles of Florida, genera Geochelone and Floridemys. University of Florida.	1.3
Haile, Alachua County, Florida	USA	29.8	-82.1	-	0.012	2.588	Pleistocene	Pleistocene	Pleistocene	Hesperotestudo	incisa	Hesperotestudo incisa	(Hay, 1916)	-	UF 2986	216	192	NA	NA	m	n	N-America	Auffenberg, W. (1963). Fossil testudinine turtles of Florida, genera Geochelone and Floridemys. University of Florida.	1.3
Haile, Alachua County, Florida	USA	29.8	-82.1	-	0.012	2.588	Pleistocene	Pleistocene	Pleistocene	Hesperotestudo	incisa	Hesperotestudo incisa	(Hay, 1916)	-	UF 3235	212	196	NA	NA	m	n	N-America	Auffenberg, W. (1963). Fossil testudinine turtles of Florida, genera Geochelone and Floridemys. University of Florida.	1.3
Haile, Alachua County, Florida	USA	29.8	-82.1	-	0.012	2.588	Pleistocene	Pleistocene	Pleistocene	Hesperotestudo	crassiscutata	Hesperotestudo crassiscutata	(Leidy, 1889)	(=Testudo sellardsi Hay, 1916)	UF 3151	327	304	NA	NA	m	n	N-America	Auffenberg, W. (1963). Fossil testudinine turtles of Florida, genera Geochelone and Floridemys. University of Florida.	1.3
Haile, Alachua County, Florida	USA	29.8	-82.1	-	0.012	2.588	Pleistocene	Pleistocene	Pleistocene	Hesperotestudo	crassiscutata	Hesperotestudo crassiscutata	(Leidy, 1889)	(=Testudo sellardsi Hay, 1916)	UF 3139	192	180	NA	NA	m	n	N-America	Auffenberg, W. (1963). Fossil testudinine turtles of Florida, genera Geochelone and Floridemys. University of Florida.	1.3
Haile, Alachua County, Florida	USA	29.8	-82.1	-	0.012	2.588	Pleistocene	Pleistocene	Pleistocene	Hesperotestudo	crassiscutata	Hesperotestudo crassiscutata	(Leidy, 1889)	(=Testudo sellardsi Hay, 1916)	UF 3226	180	169	NA	NA	m	n	N-America	Auffenberg, W. (1963). Fossil testudinine turtles of Florida, genera Geochelone and Floridemys. University of Florida.	1.3
Haile, Alachua County, Florida	USA	29.8	-82.1	-	0.012	2.588	Pleistocene	Pleistocene	Pleistocene	Hesperotestudo	crassiscutata	Hesperotestudo crassiscutata	(Leidy, 1889)	(=Testudo sellardsi Hay, 1916)	UF 3028	168	153	NA	NA	m	n	N-America	Auffenberg, W. (1963). Fossil testudinine turtles of Florida, genera Geochelone and Floridemys. University of Florida.	1.3
Jambol	Bulgaria	42.3384	26.4814	-	3.6	5.332	Pliocene	Lower Pliocene	Lower Pliocene	Geochelone	s. l.	Geochelone s. l.	Gray, 1872	-	-	1750	NA	giant	NA	mo	n	Europe	Stojanoc, A. (2009). Erster Nachweis einer Riesenlandschildkröte (Geochelone sl Gray, 1872) aus Bulgarien. Revue de Paléobiologie, 28, 457-470.	4.466
Tres Hermanas, Manila, Luzon	Philippines	14.5898	121.109	Laguna-Formation	1	1.7	Pleistocene	Lower Pleistocene	Lower Pleistocene	Megalochelys	sondaari	Megalochelys sondaari	Karl and Staesche, 2007	-	Ma-13618	1000	NA	giant	extrapolated from claw phalanges; according to original publication CL between 70-90 cm	ec	y	Asia	Karl, H., & Staesche, U. (2007). Fossile Riesen-Landschildkroten von den Philippinen und ihre palaogeographische Bedeutung. Geologisches Jahrbuch Reihe B, 98, 171.	1.35
Tres Hermanas, Manila, Luzon	Philippines	14.5898	121.109	Laguna-Formation	1	1.7	Pleistocene	Lower Pleistocene	Lower Pleistocene	Megalochelys	sondaari	Megalochelys sondaari	Karl and Staesche, 2007	-	Ma-13619	818	NA	giant	extrapolated from claw phalanges; according to original publication CL between 70-90 cm	ec	y	Asia	Karl, H., & Staesche, U. (2007). Fossile Riesen-Landschildkroten von den Philippinen und ihre palaogeographische Bedeutung. Geologisches Jahrbuch Reihe B, 98, 171.	1.35
San Pedro, Curaçao	Curaçao	12.3837	-69.1465	-	0.126	2.588	Pleistocene	Middle Pleistocene	Late Pleistocene	Chelonoidis	sp.	Chelonoidis sp.	(Hooijer, 1963)	-	-	600	NA	giant	based on humerus length in comparison to Aldabra tortoise	mo	y	C-America	Hooijer, D. A. (1963). Geochelone from the Pleistocene of Curaçao, Netherlands Antilles. Copeia, 3, 579-580.	1.357
San Pedro, Curaçao	Curaçao	12.3837	-69.1465	-	0.126	2.588	Pleistocene	Middle Pleistocene	Late Pleistocene	Chelonoidis	sp.	Chelonoidis sp.	(Hooijer, 1963)	-	-	750	NA	giant	based on femur length in comparison to Aldabra tortoise	mo	y	C-America	Hooijer, D. A. (1963). Geochelone from the Pleistocene of Curaçao, Netherlands Antilles. Copeia, 3, 579-580.	1.357
San Pedro, Curaçao	Curaçao	12.3837	-69.1465	-	0.126	2.588	Pleistocene	Middle Pleistocene	Late Pleistocene	Chelonoidis	sp.	Chelonoidis sp.	(Hooijer, 1963)	-	-	800	NA	giant	based on humerus length in comparison to Aldabra tortoise	mo	y	C-America	Hooijer, D. A. (1963). Geochelone from the Pleistocene of Curaçao, Netherlands Antilles. Copeia, 3, 579-580.	1.357
Adeje, Tenerife	Canary Islands	28.1193	-16.7356	-	0.2	0.67	Pleistocene	Middle Pleistocene	Middle Pleistocene	Centrochelys	burchardi	Centrochelys burchardi	(Ahl, 1926)	-	-	500	NA	giant	states shell length in another publication, Ahl, 1927	mo	y	Europe	Ahl, E. (1925). Über eine ausgestorbene Riesenschildkröte der Insel Teneriffa. Zeitschrift der Deutschen Geologischen Gesellschaft, 575-580.	0.435
Adeje, Tenerife	Canary Islands	28.1193	-16.7356	-	0.2	0.67	Pleistocene	Middle Pleistocene	Middle Pleistocene	Centrochelys	burchardi	Centrochelys burchardi	(Ahl, 1926)	-	-	800	NA	giant	complete shell	m	y	Europe	Ahl, E. (1925). Über eine ausgestorbene Riesenschildkröte der Insel Teneriffa. Zeitschrift der Deutschen Geologischen Gesellschaft, 575-580.	0.435
Pikermi	Greece	38.0015	23.9426	-	3.6	5.332	Pliocene	Lower Pliocene	Lower Pliocene	Titanochelon	schafferi	Titanochelon schafferi	(Szalai, 1931)	-	-	2500	NA	giant	size estimated by original author based on carapace fragments, plastron fragments, claw phalanges and comparisons to extant species	mo	n	Europe	Bachmayer, F. (1967). Eine Riesenschildkröte aus den altpliozänen Schichten von Pikermi, Griechenland.	4.466
Cala Es Pous near Ciutadella, Minorca	Minorca, Spain	40.0285	3.8347	-	0.012	2.588	Pleistocene	Pleistocene	Pleistocene	Titanochelon	gymnesica	Titanochelon gymnesica	(Bate, 1914)	-	-	1300	NA	giant	size estimated from femur	ef	y	Europe	Bate, D. M. (1914). II.—On Remains of a Gigantic Land Tortoise (Testudo Gymnesious, N. Sp.) from the Pleistocene of Menorca. Geological Magazine, 1(3), 100-107.	1.3
Gerani-Höhle an der Nordküste Kretamin der Nähe von Rethymnon	Greece	35.3	24.5	-	0.012	2.588	Pleistocene	Pleistocene	Pleistocene	Testudo	marginata	Testudo marginata	Schoepf, 1792	-	-	310	NA	NA	ein weibliches, großes Exemplar (Länge 310 mm, grösste Breite 190 mm)	m	y	Europe	Bachmayer, Brinkerink and Symeonidis, 1975	1.3
Zourida-Höhle	Greece	35.3	24.5	-	0.012	2.588	Pleistocene	Pleistocene	Pleistocene	Testudo	marginata	Testudo marginata	Schoepf, 1792	-	-	290	NA	NA	Gesamtlänge 290 mm, grösste Breite 188 mm	m	y	Europe	Bachmayer, Brinkerink and Symeonidis, 1975	1.3
Rock-Cavities, Gibraltar Peninsula	England	36.1203	-5.3419	-	0.13	1.8	Pleistocene	Upper Pleistocene	Lower Pleistocene	Cheirogaster	sp.	Cheirogaster sp.	Bergounioux, 1935	postcranial	-	925	NA	giant	estimated from femur/humerus length (130 mm) using ratio provided in Franz et al., 2001	ef	y	Europe	Adams A.L., 1877: On gigantic land-tortoises and a small freshwater species from the ossiferous caverns of Malta, together with a list of their fossil fauna; and a note on Chelonian remains from the rock-cavities of Gibraltar. Quarterly Journal of the Geological Society of London 33: 177-191	0.965
Mnaidra Gap, Malta	Malta	35.9	14.5	-	2.588	7.246	Pliocene/Miocene	Pliocene	Miocene	Centrochelys	robusta	Centrochelys robusta	Adams, 1877	-	-	790	NA	giant	estimated from femur/humerus length (66 mm) using ratio provided in Franz et al., 2001	ef	y	Europe	Adams A.L., 1877: On gigantic land-tortoises and a small freshwater species from the ossiferous caverns of Malta, together with a list of their fossil fauna; and a note on Chelonian remains from the rock-cavities of Gibraltar. Quarterly Journal of the Geological Society of London 33: 177-191	4.917
Pujo d'es Fum, Formentera, Balearic Islands	Spain	38.8	1.4	MN16-MN17	0.1	3.5	Pleistocene	Pleistocene	Pleistocene	Cheirogaster	cf. gymnesica	Cheirogaster cf. gymnesica		-	-	789	NA	giant	estimated from egg size	mo	y	Europe	Filella-Subira et al., 1999	1.8
Chañe, Segovia	Spain	41.339	-4.425	Upper Aragonian	11.6	16	Miocene	Serravallian	Langhian	Cheirogaster	sp.	Cheirogaster sp.	Bergounioux, 1935	STUS 14029-14034 shell and postcranial	STUS 8372	1500	NA	giant	estimated from Carapace fragment	e	n	Europe	Jiménez Fuentes E., 2000: Tortugas gigantes fósiles de la provincia de Segovia (Castilla y León, España). Nueva localidad: Chañe. Studia Geologica Salamanticensia 36: 109-115	13.8
Punta Nati near Ciutadella, Minorca	Spain	40.051	3.826	hard, cemented red limestone in Jurassic dolomitic limestone	3.6	5.3	Pliocene	Zanclean	Zanclean	Cheirogaster	gymnesica	Cheirogaster gymnesica	(Bate, 1914)	postcranial and fragmentary shell	-	739	NA	giant	size estimated from femur (121.2 mm)	ef	y	Europe	Mercadal B., Pretus Real L., 1980: Nuevo yacimiento de Testudo gymnesicus Bate, 1914 en la isla de Menorca. Boletín de la Sociedad de Historia Natural de Baleares 24: 15-21	4.45
La Ciesma 1, Aragón	Spain	41.86	-1.8	Aragonian, Biozone G-H	12.1	12.3	Miocene	Serravallian	Serravallian#	gen.	indet.	gen. indet.	Gray, 1825	MPZ 2006/409 osteoderm, 410 pleural, 411 pelvis, 412 neural	-	270	NA	medium	size estimated by original authors	mo	n	Europe	Murelaga X., Azanza B., Astibia H., 2006: Restos de quelonios del Mioceno medio del área de Tarazona de Aragón (Cuenca del Ebro, Aragón, España). Estudios Geológicos 62(1): 205-212	12.2
La Ciesma 1, Aragón	Spain	41.86	-1.8	Aragonian, Biozone G-H	12.1	12.3	Miocene	Serravallian	Serravallian#	Cheirogaster	sp.	Cheirogaster sp.	Bergounioux, 1935	-	-	1000	NA	large	size estimated by original authors	mo	n	Europe	Murelaga X., Azanza B., Astibia H., 2006: Restos de quelonios del Mioceno medio del área de Tarazona de Aragón (Cuenca del Ebro, Aragón, España). Estudios Geológicos 62(1): 205-212	12.2
El Buste, Aragón	Spain	41.886	-1.603	Aragonian, Biozone G	12.3	12.5	Miocene	Serravallian	Serravallian#	Paleotestudo	cf. sp.	Paleotestudo cf. sp.	Lapparent de Broin, 2000	MPZ 2006/405 peripheral, 406 epiplastron, 407 pigal	-	270	NA	medium	size estimated by original authors	mo	n	Europe	Murelaga X., Azanza B., Astibia H., 2006: Restos de quelonios del Mioceno medio del área de Tarazona de Aragón (Cuenca del Ebro, Aragón, España). Estudios Geológicos 62(1): 205-212	12.4
Tarazona de Aragón	Spain	41.903	-1.725	Aragonian, Biozone D	14.6	14.8	Miocene	Langhian	Langhian	gen.	indet.	gen. indet.	Gray, 1825	IPS 31466 peripheral	-	1000	NA	large	size estimated by original authors	mo	n	Europe	Murelaga X., Azanza B., Astibia H., 2006: Restos de quelonios del Mioceno medio del área de Tarazona de Aragón (Cuenca del Ebro, Aragón, España). Estudios Geológicos 62(1): 205-212	14.7
Tarazona de Aragón	Spain	41.903	-1.725	Aragonian, Biozone D	14.6	14.8	Miocene	Langhian	Langhian	Paleotestudo	cf. sp.	Paleotestudo cf. sp.	Lapparent de Broin, 2000	MPZ 2006/401 entoplastron, 402 periferal, 403 fragment medial peripheral, 404 right peripheral	-	270	NA	medium	size estimated by original authors	mo	n	Europe	Murelaga X., Azanza B., Astibia H., 2006: Restos de quelonios del Mioceno medio del área de Tarazona de Aragón (Cuenca del Ebro, Aragón, España). Estudios Geológicos 62(1): 205-212	14.7
Monteagudo, Aragón	Spain	41.963	-1.692	Aragonian, Biozone B-C	16	16.8	Miocene	Burdigalian	Burdigalian	gen.	indet.	gen. indet.	Gray, 1825	MPZ 2006/408 fragment pleural	-	270	NA	medium	size estimated by original authors	mo	n	Europe	Murelaga X., Azanza B., Astibia H., 2006: Restos de quelonios del Mioceno medio del área de Tarazona de Aragón (Cuenca del Ebro, Aragón, España). Estudios Geológicos 62(1): 205-212	16.4
Crevillente 2	Spain	38.27	-0.8	-	8.3	8.3	Miocene	Tortonian	Tortonian	Cheirogaster	sp.	Cheirogaster sp.	Bergounioux, 1935	postcranial and shell	-	1540	NA	giant	size estimated from femur fragment (251 mm)	ef	n	Europe	Jiménez E., Montoya P., 2002: Quelonios del Mioceno superior de Crevillente 2 (Alicante, Espana). Studia Geologica Salamanticensia, 38: 87-103 or Pickford M., Morales J., 1994: Biostratigraphy and palaeobiogeography of East Africa and the Iberian peninsula. Palaeogeography, Palaeoclimatology, Palaeoecology 112: 297-322	8.3
Ghar Dalam	Malta	35.8364	14.5281	-	0.012	2.588	Pleistocene	Pleistocene	Pleistocene	Centrochelys	robusta	Centrochelys robusta	Adams, 1877	-	-	1200	NA	giant	estimated from tibia length (170 mm)	ev	y	Europe	Hunt and Schembri, 1999	1.3
Ghar Dalam	Malta	35.8364	14.5281	-	0.012	2.588	Pleistocene	Pleistocene	Pleistocene	Centrochelys	robusta	Centrochelys robusta	Adams, 1877	-	-	600	NA	small	estimated from tibia length (85 mm)	ev	y	Europe	Hunt and Schembri, 1999	1.3
Ghar Dalam	Malta	35.8364	14.5281	-	0.012	2.588	Pleistocene	Pleistocene	Pleistocene	Centrochelys	robusta	Centrochelys robusta	Adams, 1877	-	-	850	NA	medium	estimated from tibia length (105-130 mm)	ev	y	Europe	Hunt and Schembri, 1999	1.3
Sansan, Gers (lake)	France	43.9	-0.5	Gers; drainage: Palaeo-Garonne; (ponds, pools)	13.5	13.7	Miocene	Serravallian	Langhian	Paleotestudo	antiqua	Paleotestudo antiqua	(Bronn, 1831)	MNHN.F SA 1673 carapace, SA 15657 shell, SA 1868 shell, and very abundant remains in the MNHN collection (=Testudo canetotiana Lartet, 1851)	MNHN.F SA 1673	213	160	NA	NA	mf	n	Europe	Lapparent de Broin F. de, Bour R., Perälä J., 2006: Morphological definition of Eurotestudo (Testudinidae, Chelonii): First part. Annales de Paléontologie 92(3): 255-304	13.6
Caverna de Gràcia, Güell park, Barcelona	Spain	41.4	2.15	-	0.2	0.7	Pleistocene	Middle Pleistocene	Middle Pleistocene	Testudo	lunellensis	Testudo lunellensis	Almera &Bofill, 1903	Lectotypus: MGC 6101, carapace with plastron; ref.mat: MGC 33123, 33125, 20838	MGC 6101	194	175	NA	NA	mf	n	Europe	Lapparent de Broin F. de, Bour R., Perälä J., 2006: Morphological definition of Eurotestudo (Testudinidae, Chelonii): First part. Annales de Paléontologie 92(3): 255-304	0.45
Caverna de Gràcia, Güell park, Barcelona	Spain	41.4	2.15	-	0.2	0.7	Pleistocene	Middle Pleistocene	Middle Pleistocene	Testudo	lunellensis	Testudo lunellensis	Almera &Bofill, 1903	Lectotypus: MGC 6101, carapace with plastron; ref.mat: MGC 33123, 33125, 20838	MGC 33125	NA	237	NA	NA	mf	n	Europe	Lapparent de Broin F. de, Bour R., Perälä J., 2006: Morphological definition of Eurotestudo (Testudinidae, Chelonii): First part. Annales de Paléontologie 92(3): 255-304	0.45
Soave, Zoppega 2 cave, Verona	Italy	45.42	11.25	-	0.7	0.78	Pleistocene	Middle Pleistocene	Middle Pleistocene	Eurotestudo	aff. hermanni	Eurotestudo aff. hermanni	(Gmelin, 1789)	MCSNV V4138-V4310	V4220	NA	177	NA	NA	mf	n	Europe	Lapparent de Broin F. de, Bour R., Perälä J., 2006: Morphological definition of Eurotestudo (Testudinidae, Chelonii): First part. Annales de Paléontologie 92(3): 255-304	0.74
Soave, Zoppega 2 cave, Verona	Italy	45.42	11.25	-	0.7	0.78	Pleistocene	Middle Pleistocene	Middle Pleistocene	Eurotestudo	aff. hermanni	Eurotestudo aff. hermanni	(Gmelin, 1789)	MCSNV V4138-V4310	V4307	NA	163	NA	NA	mf	n	Europe	Lapparent de Broin F. de, Bour R., Perälä J., 2006: Morphological definition of Eurotestudo (Testudinidae, Chelonii): First part. Annales de Paléontologie 92(3): 255-304	0.74
Saint-Estève-Janson, l'Escale Cave (Bouches du Rhône)	France	43.6833	5.3833	-	0.6	0.6	Pleistocene	Middle Pleistocene	Middle Pleistocene	Eurotestudo	hermanni	Eurotestudo hermanni	(Gmelin, 1789)	-	CD6611402	NA	155	NA	NA	mf	n	Europe	Lapparent de Broin F. de, Bour R., Perälä J., 2006: Morphological definition of Eurotestudo (Testudinidae, Chelonii): First part. Annales de Paléontologie 92(3): 255-304	0.6
Saint-Estève-Janson, l'Escale Cave (Bouches du Rhône)	France	43.6833	5.3833	-	0.6	0.6	Pleistocene	Middle Pleistocene	Middle Pleistocene	Eurotestudo	hermanni	Eurotestudo hermanni	(Gmelin, 1789)	-	CD6610834	NA	216	NA	NA	mf	n	Europe	Lapparent de Broin F. de, Bour R., Perälä J., 2006: Morphological definition of Eurotestudo (Testudinidae, Chelonii): First part. Annales de Paléontologie 92(3): 255-304	0.6
Capo Mannu near San Vero Milis, base of D4 dune, Sardinia	Italy	40.0409	8.3845	Capu Mannu Formation	2.588	3.6	Pliocene	Upper Pliocene	Upper Pliocene	Testudo	pecorinii	Testudo pecorinii	Delfino, 2008 (p.123-126, figs.5-6)	Holotypus: CL 102 nearly complete shell	-	225	NA	NA	CL=225 mm, CW=178 mm, CH=122 mm	m	y	Europe	Abbazzi L., Carboni S., Delfino M., Gallai G., Lecca L., Rook L., 2008: Fossil vertebrates (Mammalia and Reptilia) from Capo Mannu Formation (Late Pliocene, Sardinia, Italy), with description of a new Testudo (Chelonii, Testudinidae) species. Rivista Italiana di Paleontologia e Stratigrafia 114: 119-132	3.094
Monte Tuttavista VII mustelide, Sardinia	Italy	40.3833	9.7	-	1.5	2.5	Pleistocene	Lower Pleistocene	Gelasian	Eurotestudo	cf. hermanni	Eurotestudo cf. hermanni	(Gmelin, 1789)	-	-	150	NA	NA	NA	mo	y	Europe	Abbazzi L., Angelone C., Arca M., Barisone G., Bedetti C., Delfino M., Kotsakis T., Marcolini F., Palombo M.R., Pavia M., Piras P., Rook L., Torre D., Tuveri C., Valli A.M.F., Wilkens B., 2004: Plio-Pleistocene fossil vertebrates of Monte Tuttavista (Orosei, Eastern Sardinia, Italy), an overview. Rivista Italiana di Paleontologia e Stratigraphia 110(3): 681-706	2
Cita Canyon, UCMP V-3721, Harrell Ranch, Randall County, Texas	USA	34.9	-101.6	Blancan	1.8	4.9	Pleistocene/Pliocene	Gelasian	Zanclean	Hesperotestudo	johnstoni	Hesperotestudo johnstoni	Auffenberg, 1962	Holotypus: TPPHM 1540 complete shell	-	235	219	small	NA	m	n	N-America	Auffenberg W., 1962: A new species of Geochelone from the Pleistocene of Texas. Copeia 1962(3): 627-636	3.35
Rexroad local fauna (Fox Canyon locality 3), Meade County, Kansas	USA	37.2	-100.3	Rexroad Formation, Blancan Lithobates rexroadensis (Taylor, 1942): Rana meadensis Taylor, 1942 sacral vertebra KUMVP 6376 Rana ephippium Taylor, 1942 sacral vertebra KUMVP 6370 Rana valida Taylor, 1942 sacral vertebra KUMVP 5133	4.3	4.8	Pliocene	Zanclean	Zanclean	Hesperotestudo	riggsi	Hesperotestudo riggsi	(Hibbard, 1944)	figs.1-2UMMP 28452 (=Testudo riggsi Hibbard, 1944, Gopherus riggsi (Hibbard, 1944))	KU 7404	NA	178	small	NA	m	n	N-America	Oelrich, 1957	4.55
Buis Ranch Local Fauna, Beaver County, Oklahoma	USA	36.8	-100.5	Hemphillian	4.9	10.3	Pliocene/Miocene	Zanclean	Tortonian	Hesperotestudo	riggsi	Hesperotestudo riggsi	(Hibbard, 1944)	-	UMMP 33482	NA	145	small	NA	mo	n	N-America	Oelrich, 1957	7.6
Buis Ranch Local Fauna, Beaver County, Oklahoma	USA	36.8	-100.5	Hemphillian	4.9	10.3	Pliocene/Miocene	Zanclean	Tortonian	Hesperotestudo	riggsi	Hesperotestudo riggsi	(Hibbard, 1944)	-	UMMP 33483	NA	145	small	NA	mo	n	N-America	Oelrich, 1957	7.6
Rexroad local fauna (Fox Canyon locality 3), Meade County, Kansas	USA	37.2	-100.3	Rexroad Formation, Blancan Lithobates rexroadensis (Taylor, 1942): Rana meadensis Taylor, 1942 sacral vertebra KUMVP 6376 Rana ephippium Taylor, 1942 sacral vertebra KUMVP 6370 Rana valida Taylor, 1942 sacral vertebra KUMVP 5133	4.3	4.8	Pliocene	Zanclean	Zanclean	Caudochelys	rexroadensis	Caudochelys rexroadensis	(Oelrich, 1952)	Holotypus	UMMP 28124	830	NA	NA	The carapace has an approximate total length of 830 mm and a height of 430 mm.	m	n	N-America	Oelrich T.M., 1952: A New Testudo from the Upper Pliocene of Kansas with Additional Notes on Associated Rexroad Mammals. Transactions of the Kansas Academy of Science 55(3): 300-311	4.55
Rexroad local fauna (Fox Canyon locality 3), Meade County, Kansas	USA	37.2	-100.3	Rexroad Formation, Blancan Lithobates rexroadensis (Taylor, 1942): Rana meadensis Taylor, 1942 sacral vertebra KUMVP 6376 Rana ephippium Taylor, 1942 sacral vertebra KUMVP 6370 Rana valida Taylor, 1942 sacral vertebra KUMVP 5133	4.3	4.8	Pliocene	Zanclean	Zanclean	Caudochelys	rexroadensis	Caudochelys rexroadensis	(Oelrich, 1952)	Paratype	KU 9399	NA	710	NA	NA	m	n	N-America	Oelrich T.M., 1952: A New Testudo from the Upper Pliocene of Kansas with Additional Notes on Associated Rexroad Mammals. Transactions of the Kansas Academy of Science 55(3): 300-311	4.55
Friesenhahn Cave, Bexar County, Texas	USA	29	-98	-	0.017	0.019	Pleistocene	Upper Pleistocene	Upper Pleistocene	Hesperotestudo	wilsoni	Hesperotestudo wilsoni	(Milstead, 1956)	Holotypus: TMM 933-3585 almost complete shell	933-3585	226	205	NA	NA	m	n	N-America	Milstead W.W., 1956: Fossil turtles of Friesenhahn Cave, Texas, with the description of a new species of Testudo. Copeia 1956(3): 162-171	0.018
Ingleside Local Fauna, San Patricio County, Texas	USA	27	-96	Late Wisconsinan	0.06	0.06	Pleistocene	Upper Pleistocene	Upper Pleistocene	Hesperotestudo	sp.	Hesperotestudo sp.	Williams, 1950	-	UT 30967-1817	639	730	NA	NA	m	n	N-America	Auffenberg, 1962: A Redescription of Testudo hexagonata Cope	0.06
Ingleside Local Fauna, San Patricio County, Texas	USA	27	-96	Late Wisconsinan	0.06	0.06	Pleistocene	Upper Pleistocene	Upper Pleistocene	Hesperotestudo	sp.	Hesperotestudo sp.	Williams, 1950	-	PPHM P40-1	974	853	NA	estimated from the plastron/carapace ratio of the other specimen, since plastron is longer than carapace	ep	n	N-America	Auffenberg, 1962: A Redescription of Testudo hexagonata Cope	0.06
Garvin Gullv, 2 mi. north of Navasota, Jl J . Grimes County, Texas, Garvin Gullv local fauna	USA	30.42	-96.0901	Oakville Formation	17.5	18	Miocene	Burdigalian	Burdigalian	Caudochelys	williamsi	Caudochelys williamsi	(Auffenberg, 1964)	-	UT 31084-11	334	313	NA	NA	m	n	N-America	Auffenberg, 1964	17.75
Leisey Shell Pit 1A, Hillsborough County, Florida	USA	27.7	-82.5	late early Irvingtonian	1	1.5	Pleistocene	Lower Pleistocene	Lower Pleistocene	Hesperotestudo	mlynarskii	Hesperotestudo mlynarskii	(Auffenberg, 1998)		UF 18960	NA	150	NA	NA	m	n	N-America	Auffenberg, 1988	1.25
Leisey Shell Pit 2, Hillsborough County, Florida	USA	27.7	-82.5	late early Irvingtonian	1	1.5	Pleistocene	Lower Pleistocene	Lower Pleistocene	Hesperotestudo	mlynarskii	Hesperotestudo mlynarskii	(Auffenberg, 1998)	UF 142235 left epiplastron (or H. incisa)	UF 19957	NA	185	NA	NA	m	n	N-America	Auffenberg, 1988	1.25
Kohfidisch	Austria	47.1667	16.35	-	8.55	8.95	Miocene	Tortonian	Tortonian	Testudo	burgenlandica	Testudo burgenlandica	Bachmayer & Mlynarski, 1983	Holotypus: nearly complete carapace without xiphiplastron	-	NA	250	NA	medium-sized	m	n	Europe	Bachmayer F., M?ynarski M., 1983: Die Fauna der pontischen Höhlen- und Spaltenfüllungen bei Kohfidisch, Burgenland (Österreich)-Schildkröten (Emydidae und Testudinidae). Annalen des Naturhistorischen Museums in Wien 85/A: 107-128	8.75
Kohfidisch	Austria	47.1667	16.35	-	8.55	8.95	Miocene	Tortonian	Tortonian	gen.	indet.	gen. indet.	Gray, 1825	isolated plates, peripherales, pleurales	-	NA	400	NA	large	m	n	Europe	Bachmayer F., M?ynarski M., 1983: Die Fauna der pontischen Höhlen- und Spaltenfüllungen bei Kohfidisch, Burgenland (Österreich)-Schildkröten (Emydidae und Testudinidae). Annalen des Naturhistorischen Museums in Wien 85/A: 107-128	8.75
Kohfidisch	Austria	47.1667	16.35	-	8.55	8.95	Miocene	Tortonian	Tortonian	gen.	indet.	gen. indet.	Gray, 1825	isolated plates, peripherales, pleurales	-	NA	800	NA	large	m	n	Europe	Bachmayer F., M?ynarski M., 1983: Die Fauna der pontischen Höhlen- und Spaltenfüllungen bei Kohfidisch, Burgenland (Österreich)-Schildkröten (Emydidae und Testudinidae). Annalen des Naturhistorischen Museums in Wien 85/A: 107-128	8.75
Kohfidisch	Austria	47.1667	16.35	-	8.55	8.95	Miocene	Tortonian	Tortonian	gen.	indet.	gen. indet.	Gray, 1825	isolated plates, peripherales, pleurales	-	NA	600	NA	large	m	n	Europe	Bachmayer F., M?ynarski M., 1983: Die Fauna der pontischen Höhlen- und Spaltenfüllungen bei Kohfidisch, Burgenland (Österreich)-Schildkröten (Emydidae und Testudinidae). Annalen des Naturhistorischen Museums in Wien 85/A: 107-128	8.75
Wien-Kalksburg	Austria	48.12	16.26	Badenian	13	16	Miocene	Serravillian	Langhian	Testudo	kalksburgensis	Testudo kalksburgensis	Toula, 1896	type locality, fragment pygal boarder, pygal region carapace, anterior part plastron	-	NA	250	NA	NA	m	n	Europe	Bachmayer M.F., M?ynarski M., 1981: Testudo kalksburgensis Toula, 1896, eine valide Schildkrötenart aus den miozänen Strandbildungen von Kalksburg bei Wien. Sitzungsberichte der Akademie der Wissenschaften mathematisch-naturwissenschaftliche Klasse 190: 111-119	14.5
Prottes	Austria	48.3896	16.7454	Pontian sand and gravel deposits	7.8	8.8	Miocene	Tortonian	Tortonian	\Hadrianus\""	sp.	\Hadrianus sp.\""	Cope, 1872	NHMW 1984/67 right epiplastron, peripherale (III?), left xiphiplastron	-	1000	NA	NA	NA	m	n	Europe	Bachmayer F., M?ynarski M., 1985: Die Landschildkröten (Testudinidae) aus den Schotter-Ablagerungen (Pontien) von Prottes, Niederösterreich.. Annalen des Naturhistorischen Museums in Wien 87 A: 65-77	8.3
Prottes	Austria	48.3896	16.7454	Pontian sand and gravel deposits	7.8	8.8	Miocene	Tortonian	Tortonian	Testudo	cf. promarginata	Testudo cf. promarginata	Reinach, 1900	NHMW 1984/65 carapace, anterior part plastron, hyoplastra	-	250	NA	NA	NA	m	n	Europe	Bachmayer F., M?ynarski M., 1985: Die Landschildkröten (Testudinidae) aus den Schotter-Ablagerungen (Pontien) von Prottes, Niederösterreich.. Annalen des Naturhistorischen Museums in Wien 87 A: 65-77	8.3
Prottes	Austria	48.3896	16.7454	Pontian sand and gravel deposits	7.8	8.8	Miocene	Tortonian	Tortonian	Testudo	cf. promarginata	Testudo cf. promarginata	Reinach, 1900	NHMW 1984/65 carapace, anterior part plastron, hyoplastra	-	250	NA	NA	NA	m	n	Europe	Bachmayer F., M?ynarski M., 1985: Die Landschildkröten (Testudinidae) aus den Schotter-Ablagerungen (Pontien) von Prottes, Niederösterreich.. Annalen des Naturhistorischen Museums in Wien 87 A: 65-77	8.3
Prottes	Austria	48.3896	16.7454	Pontian sand and gravel deposits	7.8	8.8	Miocene	Tortonian	Tortonian	Testudo	cf. promarginata	Testudo cf. promarginata	Reinach, 1900	NHMW 1984/65 carapace, anterior part plastron, hyoplastra	-	250	NA	NA	NA	m	n	Europe	Bachmayer F., M?ynarski M., 1985: Die Landschildkröten (Testudinidae) aus den Schotter-Ablagerungen (Pontien) von Prottes, Niederösterreich.. Annalen des Naturhistorischen Museums in Wien 87 A: 65-77	8.3
Prottes	Austria	48.3896	16.7454	Pontian sand and gravel deposits	7.8	8.8	Miocene	Tortonian	Tortonian	Testudo	cf. promarginata	Testudo cf. promarginata	Reinach, 1900	NHMW 1984/65 carapace, anterior part plastron, hyoplastra	-	250	NA	NA	NA	m	n	Europe	Bachmayer F., M?ynarski M., 1985: Die Landschildkröten (Testudinidae) aus den Schotter-Ablagerungen (Pontien) von Prottes, Niederösterreich.. Annalen des Naturhistorischen Museums in Wien 87 A: 65-77	8.3
Prottes	Austria	48.3896	16.7454	Pontian sand and gravel deposits	7.8	8.8	Miocene	Tortonian	Tortonian	Testudo	cf. promarginata	Testudo cf. promarginata	Reinach, 1900	NHMW 1984/65 carapace, anterior part plastron, hyoplastra	-	250	NA	NA	NA	m	n	Europe	Bachmayer F., M?ynarski M., 1985: Die Landschildkröten (Testudinidae) aus den Schotter-Ablagerungen (Pontien) von Prottes, Niederösterreich.. Annalen des Naturhistorischen Museums in Wien 87 A: 65-77	8.3
Prottes	Austria	48.3896	16.7454	Pontian sand and gravel deposits	7.8	8.8	Miocene	Tortonian	Tortonian	Testudo	sp.	Testudo sp.	Linnaeus, 1758	NHMW 1984/66 anterior part carapace, fr.plastron, fr.carapace, 2 nuchals, morphologically between antiqua and pyrenaica? Eurotestudo hermanni group Lapperant de Broin et al. 2006	-	245	NA	NA	NA	m	n	Europe	Bachmayer F., M?ynarski M., 1985: Die Landschildkröten (Testudinidae) aus den Schotter-Ablagerungen (Pontien) von Prottes, Niederösterreich.. Annalen des Naturhistorischen Museums in Wien 87 A: 65-77	8.3
Prottes	Austria	48.3896	16.7454	Pontian sand and gravel deposits	7.8	8.8	Miocene	Tortonian	Tortonian	Testudo	sp.	Testudo sp.	Linnaeus, 1758	NHMW 1984/66 anterior part carapace, fr.plastron, fr.carapace, 2 nuchals, morphologically between antiqua and pyrenaica? Eurotestudo hermanni group Lapperant de Broin et al. 2006	-	245	NA	NA	NA	m	n	Europe	Bachmayer F., M?ynarski M., 1985: Die Landschildkröten (Testudinidae) aus den Schotter-Ablagerungen (Pontien) von Prottes, Niederösterreich.. Annalen des Naturhistorischen Museums in Wien 87 A: 65-77	8.3
Prottes	Austria	48.3896	16.7454	Pontian sand and gravel deposits	7.8	8.8	Miocene	Tortonian	Tortonian	Testudo	sp.	Testudo sp.	Linnaeus, 1758	NHMW 1984/66 anterior part carapace, fr.plastron, fr.carapace, 2 nuchals, morphologically between antiqua and pyrenaica? Eurotestudo hermanni group Lapperant de Broin et al. 2006	-	245	NA	NA	NA	m	n	Europe	Bachmayer F., M?ynarski M., 1985: Die Landschildkröten (Testudinidae) aus den Schotter-Ablagerungen (Pontien) von Prottes, Niederösterreich.. Annalen des Naturhistorischen Museums in Wien 87 A: 65-77	8.3
Prottes	Austria	48.3896	16.7454	Pontian sand and gravel deposits	7.8	8.8	Miocene	Tortonian	Tortonian	Testudo	sp.	Testudo sp.	Linnaeus, 1758	NHMW 1984/66 anterior part carapace, fr.plastron, fr.carapace, 2 nuchals, morphologically between antiqua and pyrenaica? Eurotestudo hermanni group Lapperant de Broin et al. 2006	-	245	NA	NA	NA	m	n	Europe	Bachmayer F., M?ynarski M., 1985: Die Landschildkröten (Testudinidae) aus den Schotter-Ablagerungen (Pontien) von Prottes, Niederösterreich.. Annalen des Naturhistorischen Museums in Wien 87 A: 65-77	8.3
Prottes	Austria	48.3896	16.7454	Pontian sand and gravel deposits	7.8	8.8	Miocene	Tortonian	Tortonian	Testudo	sp.	Testudo sp.	Linnaeus, 1758	NHMW 1984/66 anterior part carapace, fr.plastron, fr.carapace, 2 nuchals, morphologically between antiqua and pyrenaica? Eurotestudo hermanni group Lapperant de Broin et al. 2006	-	245	NA	NA	NA	m	n	Europe	Bachmayer F., M?ynarski M., 1985: Die Landschildkröten (Testudinidae) aus den Schotter-Ablagerungen (Pontien) von Prottes, Niederösterreich.. Annalen des Naturhistorischen Museums in Wien 87 A: 65-77	8.3
Prottes	Austria	48.3896	16.7454	Pontian sand and gravel deposits	7.8	8.8	Miocene	Tortonian	Tortonian	Testudo	sp.	Testudo sp.	Linnaeus, 1758	NHMW 1984/66 anterior part carapace, fr.plastron, fr.carapace, 2 nuchals, morphologically between antiqua and pyrenaica? Eurotestudo hermanni group Lapperant de Broin et al. 2006	-	245	NA	NA	NA	m	n	Europe	Bachmayer F., M?ynarski M., 1985: Die Landschildkröten (Testudinidae) aus den Schotter-Ablagerungen (Pontien) von Prottes, Niederösterreich.. Annalen des Naturhistorischen Museums in Wien 87 A: 65-77	8.3
Northwest of Naipli	India	29.19	76.75	Tatrot Formation	2.588	3.6	Pliocene	Upper Pliocene	Upper Pliocene	Megalochelys	atlas	Megalochelys atlas	Falconer and Cautley, 1844	-	BM 40603	1600	NA	giant	The length of the shell over the curve is 1800 mm, the width is 1520 mm and the height is 500 mm. The height from the plastron to the ventral side of the carapace is 400 mm.	mo	n	Asia	Badam, 1981	3.094
Northwest of Naipli	India	29.19	76.75	Tatrot Formation	2.588	3.6	Pliocene	Upper Pliocene	Upper Pliocene	Megalochelys	atlas	Megalochelys atlas	Falconer and Cautley, 1844	-	BMR 326a-c	1600	NA	giant	The length of the shell over the curve is 1800 mm, the width is 1520 mm and the height is 500 mm. The height from the plastron to the ventral side of the carapace is 400 mm.	mo	n	Asia	Badam, 1981	3.094
Cova de Ca Na Reia, Eivissa, Ibiza	Spain	38.9091	1.4267	-	2.5	2.7	Pleistocene	Gelasian	Gelasian	Titanochelon	sp.	Titanochelon sp.	(Bour, 1985a)	carapace fragments and postcranial	-	520	NA	medium	NA	mo	y	Europe	Bour R., 1985: Una nova tortuga terrestre del Pleistocè d´Eivissa: la tortuga de la Cova de Ca Na Reia. Endins 10-11: 57-62	2.6
Drimolon, Sterkfontein, Krugersdorp District, Gauteng Province	South Africa	-26.0171	27.7337	-	1.6	2	Pliocene/Pleistocene	Pliocene/Pleistocene	Pliocene/Pleistocene	Psammobates	antiquorum	Psammobates antiquorum	Broadley, 1997	-	DN803	NA	98	small	NA	m	n	Africa	Broadley, 1997	1.8
Pomongwe Cave, Matobo National Park, southwest Zimbabwe	Zimbabwe	-20.5474	28.5137	-	0.009	0.01	Holocene	Early Holocene	Early Holocene	Kinixys	sp.	Kinixys sp.	Bell, 1827	-	NMZB14475A	268	NA	NA	estimated from femur length (44 mm) using ratio provided in Franz et al., 2001	ef	n	Africa	Broadley, 2007	0.0095
Beautiful Bone, Alta Guajira Peninsula, Cocinetas basin	Colombia	11.6131	71.3592	Castilletes Formation	14.5	17.3	Miocene	Miocene	Miocene	Chelonoidis	sp.	Chelonoidis sp.	Fitzinger, 1835	-	MNU-STRI-dbid 37475	300	NA	NA	The first is represented by tortoises with shells ranging from 20 to 40 cm long	mo	n	S-America	Cadena, 2015	15.9
Beautiful Bone, Alta Guajira Peninsula, Cocinetas basin	Colombia	11.6131	71.3592	Castilletes Formation	14.5	17.3	Miocene	Miocene	Miocene	Chelonoidis	sp.	Chelonoidis sp.	Fitzinger, 1835	-	MNU-STRI-dbid 37476	300	NA	NA	The first is represented by tortoises with shells ranging from 20 to 40 cm long	mo	n	S-America	Cadena, 2015	15.9
Beautiful Bone, Alta Guajira Peninsula, Cocinetas basin	Colombia	11.6131	71.3592	Castilletes Formation	14.5	17.3	Miocene	Miocene	Miocene	Chelonoidis	sp.	Chelonoidis sp.	Fitzinger, 1835	-	MNU-STRI-dbid 37476	1060	NA	giant	estimated from phalange (7 cm) using ratio from Franz et al, 2001	ec	n	S-America	Cadena, 2015	15.9
Mona Island	Mona Island	18.087	-67.8892	-	0.003	0.126	Holocene/Pleistocene	Late Holocene	Late Holocene	Chelonoidis	monensis	Chelonoidis monensis	(Williams, 1952)	-	AMNH 1936	500	NA	moderate	estimated from humerus length (13,7 cm) using ratio from Franz et al, 2001	m	y	C-America	Williams, 1952	0.0645
Río Tomayate, Apopa Municipality	El Salvador	13.7833	89.1667	-	0.126	1.806	Pleistocene	Early Pleistocene	Middle Pleistocene	Hesperotestudo	sp.	Hesperotestudo sp.	(Webb and Perrigo, 1984)	-	2SSAP30-662	1500	NA	giant	estimated from partial costal by orgininal authors	mo	n	C-America	Cisneros, 2005	0.966
Plum Point, Calvert County, Maryland	USA	38	-76	lower part Shattuck's Zone 11, Plum Point Member (Plum Point B), Calvert Formation	15	15	Miocene	Langhian	Langhian	Caudochelys	ducateli	Caudochelys ducateli	(Collins & Lynn, 1936)	CMM-V-4665 fourth left peripheral	13783	NA	309	NA	NA	m	n	N-America	Collins & Lynns, 1936	15
Cova del Rinoceront, eastern Garraf Massif, Can´Aymerich quarry, Castelldelfs	Spain	41.2736	1.9609	Layer I to VIII, with lithic artefacts	0.074	0.147	Pleistocene	Upper Pleistocene	Middle Pleistocene	Eurotestudo	hermanni	Eurotestudo hermanni	(Gmelin, 1789)	NISP 58 NMI 2 (L I), NISP 23 NMI 2 (L II), NISP 265 NMI 23 (L III)	-	187	NA	NA	NA	mf	n	Europe	Daura J., Sanz M., Julià R., García-Fernández D., Fornós J.J., Vaquero M., Allué E., López-García J.M., Blain H.A., Ortiz J.E., Torres T., Albert J.M., et al., 2015: Cova del Rinoceront (Castelldefels, Barcelona): a terrestrial record for the Last Interglacial period (MIS 5) in the Mediterranean coast of the Iberian Peninsula. Quaternay Science Reviews 114: 203-227	0.1105
Quebrada de Ñuapua, Chuquisaca department	Bolivia	-20.5307	-62.9991	Lujanian	0.012	0.126	Pleistocene	Pleistocene	Pleistocene	Chelonoidis	sp.	Chelonoidis sp.	(Hooijer, 1963)	-	-	1000	NA	giant	NA	mo	n	S-America	De Broin, 1991	0.069
Cova de Gràcia, Park Güell, Barcelona	Spain	41.4136	2.1528	Toringian, biozone Arvicula aff. sapidus	0.126	0.781	Pleistocene	Middle Pleistocene	Middle Pleistocene	Testudo	lunellensis	Testudo lunellensis	Almera &Bofill, 1903	Lectotypus: MGB MGC 6101 partial shell, Paralectotypes: MGB MGC 20642+20838 partial shells, ref.mat.: diverse remains in the IPS, MSCB and MGB MGC collections	IPS 57549	NA	210	NA	estimated from fragmented plastron (=19.2 cm) and fragmented carapace (ca. 19.5 cm)	ev	n	Europe	Delfino M., Luján À.H., Carmona R., Alba D.M., 2012: Revision of the extinct Pleistocene tortoise Testudo lunellensis Almera and Bo?ll, 1903 from Cova de Gràcia (Barcelona, Spain). Amphibia-Reptilia 33: 215-225	0.4535
Cova de Gràcia, Park Güell, Barcelona	Spain	41.4136	2.1528	Toringian, biozone Arvicula aff. sapidus	0.126	0.781	Pleistocene	Middle Pleistocene	Middle Pleistocene	Testudo	lunellensis	Testudo lunellensis	Almera &Bofill, 1903	Lectotypus: MGB MGC 6101 partial shell, Paralectotypes: MGB MGC 20642+20838 partial shells, ref.mat.: diverse remains in the IPS, MSCB and MGB MGC collections	MSCB28193	NA	160	NA	NA	mo	n	Europe	Delfino M., Luján À.H., Carmona R., Alba D.M., 2012: Revision of the extinct Pleistocene tortoise Testudo lunellensis Almera and Bo?ll, 1903 from Cova de Gràcia (Barcelona, Spain). Amphibia-Reptilia 33: 215-225	0.4535
Zubbio di Cozzo San Pietro	Sicily, Italy	38.1026	13.5094	-	0.012	0.013	Pleistocene	Pleistocene	Pleistocene	gen.	indet.	gen. indet.	Gray, 1825	-	-	813	NA	semi-giant	estimated from femur (10 cm) usign ratio provided by Franz et al., 2001	ef	y	Europe	Delfino et al., 2015	0.0125
Melbourne, Brevard County, Florida	USA	28.1	-80.6	-	0.012	0.126	Pleistocene	Upper Pleistocene	Upper Pleistocene	Gopherus	praecedens	Gopherus praecedens	-	-	USNM 11999	360	NA	NA	335 mm along midline suture	mo	n	N-America	Franz and Quitmyer, 2005	0.069
Inglis 1A, Florida	USA	29.0114	-82.6781	-	1.9	1.9	Pliocene	Late Pliocene	Late Pliocene	Gopherus	sp.	Gopherus sp.	Franz and Quitmyer, 2005	-	UF 211285	143.9	NA	NA	estimated from different skeletal elements by original authors	mo	n	N-America	Franz and Quitmyer, 2005	1.9
Inglis 1A, Florida	USA	29.0114	-82.6781	-	1.9	1.9	Pliocene	Late Pliocene	Late Pliocene	Gopherus	sp.	Gopherus sp.	Franz and Quitmyer, 2005	-	UF 211286	118.9	NA	NA	estimated from different skeletal elements by original authors	mo	n	N-America	Franz and Quitmyer, 2005	1.9
Inglis 1A, Florida	USA	29.0114	-82.6781	-	1.9	1.9	Pliocene	Late Pliocene	Late Pliocene	Gopherus	sp.	Gopherus sp.	Franz and Quitmyer, 2005	-	UF 211287	181	NA	NA	estimated from different skeletal elements by original authors	mo	n	N-America	Franz and Quitmyer, 2005	1.9
Inglis 1A, Florida	USA	29.0114	-82.6781	-	1.9	1.9	Pliocene	Late Pliocene	Late Pliocene	Gopherus	sp.	Gopherus sp.	Franz and Quitmyer, 2005	-	UF 211288	194.9	NA	NA	estimated from different skeletal elements by original authors	mo	n	N-America	Franz and Quitmyer, 2005	1.9
Inglis 1A, Florida	USA	29.0114	-82.6781	-	1.9	1.9	Pliocene	Late Pliocene	Late Pliocene	Gopherus	sp.	Gopherus sp.	Franz and Quitmyer, 2005	-	UF 211289	193.3	NA	NA	estimated from different skeletal elements by original authors	mo	n	N-America	Franz and Quitmyer, 2005	1.9
Inglis 1A, Florida	USA	29.0114	-82.6781	-	1.9	1.9	Pliocene	Late Pliocene	Late Pliocene	Gopherus	sp.	Gopherus sp.	Franz and Quitmyer, 2005	-	UF 211290	236.7	NA	NA	estimated from different skeletal elements by original authors	mo	n	N-America	Franz and Quitmyer, 2005	1.9
Inglis 1A, Florida	USA	29.0114	-82.6781	-	1.9	1.9	Pliocene	Late Pliocene	Late Pliocene	Gopherus	sp.	Gopherus sp.	Franz and Quitmyer, 2005	-	UF 211291	188.3	NA	NA	estimated from different skeletal elements by original authors	mo	n	N-America	Franz and Quitmyer, 2005	1.9
Inglis 1A, Florida	USA	29.0114	-82.6781	-	1.9	1.9	Pliocene	Late Pliocene	Late Pliocene	Gopherus	sp.	Gopherus sp.	Franz and Quitmyer, 2005	-	UF 211292	218.8	NA	NA	estimated from different skeletal elements by original authors	mo	n	N-America	Franz and Quitmyer, 2005	1.9
Inglis 1A, Florida	USA	29.0114	-82.6781	-	1.9	1.9	Pliocene	Late Pliocene	Late Pliocene	Gopherus	sp.	Gopherus sp.	Franz and Quitmyer, 2005	-	UF 211293	180.9	NA	NA	estimated from different skeletal elements by original authors	mo	n	N-America	Franz and Quitmyer, 2005	1.9
Inglis 1A, Florida	USA	29.0114	-82.6781	-	1.9	1.9	Pliocene	Late Pliocene	Late Pliocene	Gopherus	sp.	Gopherus sp.	Franz and Quitmyer, 2005	-	UF 211294	204.4	NA	NA	estimated from different skeletal elements by original authors	mo	n	N-America	Franz and Quitmyer, 2005	1.9
Inglis 1A, Florida	USA	29.0114	-82.6781	-	1.9	1.9	Pliocene	Late Pliocene	Late Pliocene	Gopherus	sp.	Gopherus sp.	Franz and Quitmyer, 2005	-	UF 211295	181	NA	NA	estimated from different skeletal elements by original authors	mo	n	N-America	Franz and Quitmyer, 2005	1.9
Inglis 1A, Florida	USA	29.0114	-82.6781	-	1.9	1.9	Pliocene	Late Pliocene	Late Pliocene	Gopherus	sp.	Gopherus sp.	Franz and Quitmyer, 2005	-	UF 211296	209.6	NA	NA	estimated from different skeletal elements by original authors	mo	n	N-America	Franz and Quitmyer, 2005	1.9
Inglis 1A, Florida	USA	29.0114	-82.6781	-	1.9	1.9	Pliocene	Late Pliocene	Late Pliocene	Gopherus	sp.	Gopherus sp.	Franz and Quitmyer, 2005	-	UF 211297	182.3	NA	NA	estimated from different skeletal elements by original authors	mo	n	N-America	Franz and Quitmyer, 2005	1.9
Inglis 1A, Florida	USA	29.0114	-82.6781	-	1.9	1.9	Pliocene	Late Pliocene	Late Pliocene	Gopherus	sp.	Gopherus sp.	Franz and Quitmyer, 2005	-	UF 211298	163.5	NA	NA	estimated from different skeletal elements by original authors	mo	n	N-America	Franz and Quitmyer, 2005	1.9
Inglis 1A, Florida	USA	29.0114	-82.6781	-	1.9	1.9	Pliocene	Late Pliocene	Late Pliocene	Gopherus	sp.	Gopherus sp.	Franz and Quitmyer, 2005	-	UF 211323	188.7	NA	NA	estimated from different skeletal elements by original authors	mo	n	N-America	Franz and Quitmyer, 2005	1.9
Inglis 1C, Florida	USA	29.0114	-82.6781	-	1.8	1.8	Pliocene	Late Pliocene	Late Pliocene	Gopherus	sp.	Gopherus sp.	Franz and Quitmyer, 2005	-	SSH	241.9	NA	NA	estimated from different skeletal elements by original authors	mo	n	N-America	Franz and Quitmyer, 2005	1.8
Inglis 1C, Florida	USA	29.0114	-82.6781	-	1.8	1.8	Pliocene	Late Pliocene	Late Pliocene	Gopherus	sp.	Gopherus sp.	Franz and Quitmyer, 2005	-	SSH	202.8	NA	NA	estimated from different skeletal elements by original authors	mo	n	N-America	Franz and Quitmyer, 2005	1.8
Inglis 1C, Florida	USA	29.0114	-82.6781	-	1.8	1.8	Pliocene	Late Pliocene	Late Pliocene	Gopherus	sp.	Gopherus sp.	Franz and Quitmyer, 2005	-	SSH	230.1	NA	NA	estimated from different skeletal elements by original authors	mo	n	N-America	Franz and Quitmyer, 2005	1.8
Inglis 1C, Florida	USA	29.0114	-82.6781	-	1.8	1.8	Pliocene	Late Pliocene	Late Pliocene	Gopherus	sp.	Gopherus sp.	Franz and Quitmyer, 2005	-	SSH	245.4	NA	NA	estimated from different skeletal elements by original authors	mo	n	N-America	Franz and Quitmyer, 2005	1.8
Inglis 1C, Florida	USA	29.0114	-82.6781	-	1.8	1.8	Pliocene	Late Pliocene	Late Pliocene	Gopherus	sp.	Gopherus sp.	Franz and Quitmyer, 2005	-	SSH	224.1	NA	NA	estimated from different skeletal elements by original authors	mo	n	N-America	Franz and Quitmyer, 2005	1.8
Inglis 1C, Florida	USA	29.0114	-82.6781	-	1.8	1.8	Pliocene	Late Pliocene	Late Pliocene	Gopherus	sp.	Gopherus sp.	Franz and Quitmyer, 2005	-	SSH	259.5	NA	NA	estimated from different skeletal elements by original authors	mo	n	N-America	Franz and Quitmyer, 2005	1.8
Leisey Shell Pit 1A, Hillsborough County, Florida	USA	27.7	-82.5	late early Irvingtonian	0.6	1.8	Pleistocene	Lower Pleistocene	Middle Pleistocene	Gopherus	polyphemus	Gopherus polyphemus	(Daudin, 1803)	-	UF 80458	276.6	NA	NA	estimated from different skeletal elements by original authors	mo	n	N-America	Franz and Quitmyer, 2005	1.2
Leisey Shell Pit 1A, Hillsborough County, Florida	USA	27.7	-82.5	late early Irvingtonian	0.6	1.8	Pleistocene	Lower Pleistocene	Middle Pleistocene	Gopherus	polyphemus	Gopherus polyphemus	(Daudin, 1803)	-	UF 69394	268.9	NA	NA	estimated from different skeletal elements by original authors	mo	n	N-America	Franz and Quitmyer, 2005	1.2
Leisey Shell Pit 1A, Hillsborough County, Florida	USA	27.7	-82.5	late early Irvingtonian	0.6	1.8	Pleistocene	Lower Pleistocene	Middle Pleistocene	Gopherus	polyphemus	Gopherus polyphemus	(Daudin, 1803)	-	UF 83601	217.9	NA	NA	estimated from different skeletal elements by original authors	mo	n	N-America	Franz and Quitmyer, 2005	1.2
Coleman 2A	USA	28.8015	-82.0705	-	0.3	0.5	Pleistocene	Lower Pleistocene	Middle Pleistocene	Gopherus	polyphemus	Gopherus polyphemus	(Daudin, 1803)	-	UF 13390b	285.6	NA	NA	estimated from different skeletal elements by original authors	mo	n	N-America	Franz and Quitmyer, 2005	0.4
Coleman 2A	USA	28.8015	-82.0705	-	0.3	0.5	Pleistocene	Lower Pleistocene	Middle Pleistocene	Gopherus	polyphemus	Gopherus polyphemus	(Daudin, 1803)	-	UF 13390h	350.83	NA	NA	estimated from different skeletal elements by original authors	mo	n	N-America	Franz and Quitmyer, 2005	0.4
Coleman 2A	USA	28.8015	-82.0705	-	0.3	0.5	Pleistocene	Lower Pleistocene	Middle Pleistocene	Gopherus	polyphemus	Gopherus polyphemus	(Daudin, 1803)	-	UF 13390c	272.57	NA	NA	estimated from different skeletal elements by original authors	mo	n	N-America	Franz and Quitmyer, 2005	0.4
Coleman 2A	USA	28.8015	-82.0705	-	0.3	0.5	Pleistocene	Lower Pleistocene	Middle Pleistocene	Gopherus	polyphemus	Gopherus polyphemus	(Daudin, 1803)	-	UF 13390m	353.3	NA	NA	estimated from different skeletal elements by original authors	mo	n	N-America	Franz and Quitmyer, 2005	0.4
Coleman 2A	USA	28.8015	-82.0705	-	0.3	0.5	Pleistocene	Lower Pleistocene	Middle Pleistocene	Gopherus	polyphemus	Gopherus polyphemus	(Daudin, 1803)	-	UF 13390d	304.7	NA	NA	estimated from different skeletal elements by original authors	mo	n	N-America	Franz and Quitmyer, 2005	0.4
Coleman 2A	USA	28.8015	-82.0705	-	0.3	0.5	Pleistocene	Lower Pleistocene	Middle Pleistocene	Gopherus	polyphemus	Gopherus polyphemus	(Daudin, 1803)	-	UF13390e	260.5	NA	NA	estimated from different skeletal elements by original authors	mo	n	N-America	Franz and Quitmyer, 2005	0.4
Coleman 2A	USA	28.8015	-82.0705	-	0.3	0.5	Pleistocene	Lower Pleistocene	Middle Pleistocene	Gopherus	polyphemus	Gopherus polyphemus	(Daudin, 1803)	-	UF 13390i	293	NA	NA	estimated from different skeletal elements by original authors	mo	n	N-America	Franz and Quitmyer, 2005	0.4
Coleman 2A	USA	28.8015	-82.0705	-	0.3	0.5	Pleistocene	Lower Pleistocene	Middle Pleistocene	Gopherus	polyphemus	Gopherus polyphemus	(Daudin, 1803)	-	UF 13390l	308.2	NA	NA	estimated from different skeletal elements by original authors	mo	n	N-America	Franz and Quitmyer, 2005	0.4
Coleman 2A	USA	28.8015	-82.0705	-	0.3	0.5	Pleistocene	Lower Pleistocene	Middle Pleistocene	Gopherus	polyphemus	Gopherus polyphemus	(Daudin, 1803)	-	UF 13390k	348.7	NA	NA	estimated from different skeletal elements by original authors	mo	n	N-America	Franz and Quitmyer, 2005	0.4
Coleman 2A	USA	28.8015	-82.0705	-	0.3	0.5	Pleistocene	Lower Pleistocene	Middle Pleistocene	Gopherus	polyphemus	Gopherus polyphemus	(Daudin, 1803)	-	UF 13390j	295.9	NA	NA	estimated from different skeletal elements by original authors	mo	n	N-America	Franz and Quitmyer, 2005	0.4
Coleman 2A	USA	28.8015	-82.0705	-	0.3	0.5	Pleistocene	Lower Pleistocene	Middle Pleistocene	Gopherus	polyphemus	Gopherus polyphemus	(Daudin, 1803)	-	UF 13390f	260.51	NA	NA	estimated from different skeletal elements by original authors	mo	n	N-America	Franz and Quitmyer, 2005	0.4
Coleman 2A	USA	28.8015	-82.0705	-	0.3	0.5	Pleistocene	Lower Pleistocene	Middle Pleistocene	Gopherus	polyphemus	Gopherus polyphemus	(Daudin, 1803)	-	UF 13390a	293.57	NA	NA	estimated from different skeletal elements by original authors	mo	n	N-America	Franz and Quitmyer, 2005	0.4
Haile, Alachua County, Florida	USA	29.8	-82.1	-	0.25	0.25	Pleistocene	Lower Pleistocene	Middle Pleistocene	Gopherus	polyphemus	Gopherus polyphemus	(Daudin, 1803)	-	UF uncat.	306	NA	NA	estimated from different skeletal elements by original authors	mo	n	N-America	Franz and Quitmyer, 2005	0.25
Haile, Alachua County, Florida	USA	29.8	-82.1	-	0.25	0.25	Pleistocene	Lower Pleistocene	Middle Pleistocene	Gopherus	polyphemus	Gopherus polyphemus	(Daudin, 1803)	-	UF 9435	306	NA	NA	estimated from different skeletal elements by original authors	mo	n	N-America	Franz and Quitmyer, 2005	0.25
Haile, Alachua County, Florida	USA	29.8	-82.1	-	0.25	0.25	Pleistocene	Lower Pleistocene	Middle Pleistocene	Gopherus	polyphemus	Gopherus polyphemus	(Daudin, 1803)	-	UF 3254	337.3	NA	NA	estimated from different skeletal elements by original authors	mo	n	N-America	Franz and Quitmyer, 2005	0.25
Haile, Alachua County, Florida	USA	29.8	-82.1	-	0.25	0.25	Pleistocene	Lower Pleistocene	Middle Pleistocene	Gopherus	polyphemus	Gopherus polyphemus	(Daudin, 1803)	-	UF 3834	253.7	NA	NA	estimated from different skeletal elements by original authors	mo	n	N-America	Franz and Quitmyer, 2005	0.25
Haile, Alachua County, Florida	USA	29.8	-82.1	-	0.25	0.25	Pleistocene	Lower Pleistocene	Middle Pleistocene	Gopherus	polyphemus	Gopherus polyphemus	(Daudin, 1803)	-	UF uncat.	322.63	NA	NA	estimated from different skeletal elements by original authors	mo	n	N-America	Franz and Quitmyer, 2005	0.25
Haile, Alachua County, Florida	USA	29.8	-82.1	-	0.25	0.25	Pleistocene	Lower Pleistocene	Middle Pleistocene	Gopherus	polyphemus	Gopherus polyphemus	(Daudin, 1803)	-	UF 3476	257.8	NA	NA	estimated from different skeletal elements by original authors	mo	n	N-America	Franz and Quitmyer, 2005	0.25
Haile, Alachua County, Florida	USA	29.8	-82.1	-	0.25	0.25	Pleistocene	Lower Pleistocene	Middle Pleistocene	Gopherus	polyphemus	Gopherus polyphemus	(Daudin, 1803)	-	UF uncat.	239.8	NA	NA	estimated from different skeletal elements by original authors	mo	n	N-America	Franz and Quitmyer, 2005	0.25
Haile, Alachua County, Florida	USA	29.8	-82.1	-	0.25	0.25	Pleistocene	Lower Pleistocene	Middle Pleistocene	Gopherus	polyphemus	Gopherus polyphemus	(Daudin, 1803)	-	UF 3074	256.44	NA	NA	estimated from different skeletal elements by original authors	mo	n	N-America	Franz and Quitmyer, 2005	0.25
Haile, Alachua County, Florida	USA	29.8	-82.1	-	0.25	0.25	Pleistocene	Lower Pleistocene	Middle Pleistocene	Gopherus	polyphemus	Gopherus polyphemus	(Daudin, 1803)	-	UF 3071	292.94	NA	NA	estimated from different skeletal elements by original authors	mo	n	N-America	Franz and Quitmyer, 2005	0.25
Haile, Alachua County, Florida	USA	29.8	-82.1	-	0.25	0.25	Pleistocene	Lower Pleistocene	Middle Pleistocene	Gopherus	polyphemus	Gopherus polyphemus	(Daudin, 1803)	-	UF 3477	267	NA	NA	estimated from different skeletal elements by original authors	mo	n	N-America	Franz and Quitmyer, 2005	0.25
Haile, Alachua County, Florida	USA	29.8	-82.1	-	0.25	0.25	Pleistocene	Lower Pleistocene	Middle Pleistocene	Gopherus	polyphemus	Gopherus polyphemus	(Daudin, 1803)	-	UF 2457	314.6	NA	NA	estimated from different skeletal elements by original authors	mo	n	N-America	Franz and Quitmyer, 2005	0.25
Haile, Alachua County, Florida	USA	29.8	-82.1	-	0.25	0.25	Pleistocene	Lower Pleistocene	Middle Pleistocene	Gopherus	polyphemus	Gopherus polyphemus	(Daudin, 1803)	-	UF 3786	285.2	NA	NA	estimated from different skeletal elements by original authors	mo	n	N-America	Franz and Quitmyer, 2005	0.25
Haile, Alachua County, Florida	USA	29.8	-82.1	-	0.25	0.25	Pleistocene	Lower Pleistocene	Middle Pleistocene	Gopherus	polyphemus	Gopherus polyphemus	(Daudin, 1803)	-	UF 9655	283	NA	NA	estimated from different skeletal elements by original authors	mo	n	N-America	Franz and Quitmyer, 2005	0.25
Haile, Alachua County, Florida	USA	29.8	-82.1	-	0.25	0.25	Pleistocene	Lower Pleistocene	Middle Pleistocene	Gopherus	polyphemus	Gopherus polyphemus	(Daudin, 1803)	-	UF 3824	302.4	NA	NA	estimated from different skeletal elements by original authors	mo	n	N-America	Franz and Quitmyer, 2005	0.25
Haile, Alachua County, Florida	USA	29.8	-82.1	-	0.25	0.25	Pleistocene	Lower Pleistocene	Middle Pleistocene	Gopherus	polyphemus	Gopherus polyphemus	(Daudin, 1803)	-	UF 3823	292	NA	NA	estimated from different skeletal elements by original authors	mo	n	N-America	Franz and Quitmyer, 2005	0.25
Haile, Alachua County, Florida	USA	29.8	-82.1	-	0.25	0.25	Pleistocene	Lower Pleistocene	Middle Pleistocene	Gopherus	polyphemus	Gopherus polyphemus	(Daudin, 1803)	-	UF 3813	274.3	NA	NA	estimated from different skeletal elements by original authors	mo	n	N-America	Franz and Quitmyer, 2005	0.25
Haile, Alachua County, Florida	USA	29.8	-82.1	-	0.25	0.25	Pleistocene	Lower Pleistocene	Middle Pleistocene	Gopherus	polyphemus	Gopherus polyphemus	(Daudin, 1803)	-	UF 9658	283.41	NA	NA	estimated from different skeletal elements by original authors	mo	n	N-America	Franz and Quitmyer, 2005	0.25
Haile, Alachua County, Florida	USA	29.8	-82.1	-	0.25	0.25	Pleistocene	Lower Pleistocene	Middle Pleistocene	Gopherus	polyphemus	Gopherus polyphemus	(Daudin, 1803)	-	UF 9591	272.48	NA	NA	estimated from different skeletal elements by original authors	mo	n	N-America	Franz and Quitmyer, 2005	0.25
Reddick IA+B, Marion County, Florida	USA	29.1	-82.3	late Rancholabrean	0.012	0.126	Pleistocene	Upper Pleistocene	Upper Pleistocene	Gopherus	polyphemus	Gopherus polyphemus	(Daudin, 1803)	-	UF 2706a	391.9	NA	NA	estimated from different skeletal elements by original authors	mo	n	N-America	Franz and Quitmyer, 2005	0.069
Reddick IA+B, Marion County, Florida	USA	29.1	-82.3	late Rancholabrean	0.012	0.126	Pleistocene	Upper Pleistocene	Upper Pleistocene	Gopherus	polyphemus	Gopherus polyphemus	(Daudin, 1803)	-	UF 2706b	327.6	NA	NA	estimated from different skeletal elements by original authors	mo	n	N-America	Franz and Quitmyer, 2005	0.069
Reddick IA+B, Marion County, Florida	USA	29.1	-82.3	late Rancholabrean	0.012	0.126	Pleistocene	Upper Pleistocene	Upper Pleistocene	Gopherus	polyphemus	Gopherus polyphemus	(Daudin, 1803)	-	UF uncat.	155.5	NA	NA	estimated from different skeletal elements by original authors	mo	n	N-America	Franz and Quitmyer, 2005	0.069
Surprise Cave, Alachua, Florida	USA	29.8031	-82.5045	-	0.012	0.126	Pleistocene	Upper Pleistocene	Upper Pleistocene	Gopherus	polyphemus	Gopherus polyphemus	(Daudin, 1803)	-	UF 161885	350	NA	NA	estimated from different skeletal elements by original authors	mo	n	N-America	Franz and Quitmyer, 2005	0.069
Surprise Cave, Alachua, Florida	USA	29.8031	-82.5045	-	0.012	0.126	Pleistocene	Upper Pleistocene	Upper Pleistocene	Gopherus	polyphemus	Gopherus polyphemus	(Daudin, 1803)	-	UF 161674	294.16	NA	NA	estimated from different skeletal elements by original authors	mo	n	N-America	Franz and Quitmyer, 2005	0.069
Surprise Cave, Alachua, Florida	USA	29.8031	-82.5045	-	0.012	0.126	Pleistocene	Upper Pleistocene	Upper Pleistocene	Gopherus	polyphemus	Gopherus polyphemus	(Daudin, 1803)	-	UF 160157	102.44	NA	NA	estimated from different skeletal elements by original authors	mo	n	N-America	Franz and Quitmyer, 2005	0.069
Surprise Cave, Alachua, Florida	USA	29.8031	-82.5045	-	0.012	0.126	Pleistocene	Upper Pleistocene	Upper Pleistocene	Gopherus	polyphemus	Gopherus polyphemus	(Daudin, 1803)	-	UF 161886	304.2	NA	NA	estimated from different skeletal elements by original authors	mo	n	N-America	Franz and Quitmyer, 2005	0.069
Surprise Cave, Alachua, Florida	USA	29.8031	-82.5045	-	0.012	0.126	Pleistocene	Upper Pleistocene	Upper Pleistocene	Gopherus	polyphemus	Gopherus polyphemus	(Daudin, 1803)	-	UF 138002	324	NA	NA	estimated from different skeletal elements by original authors	mo	n	N-America	Franz and Quitmyer, 2005	0.069
Surprise Cave, Alachua, Florida	USA	29.8031	-82.5045	-	0.012	0.126	Pleistocene	Upper Pleistocene	Upper Pleistocene	Gopherus	polyphemus	Gopherus polyphemus	(Daudin, 1803)	-	UF 161921	258.3	NA	NA	estimated from different skeletal elements by original authors	mo	n	N-America	Franz and Quitmyer, 2005	0.069
Surprise Cave, Alachua, Florida	USA	29.8031	-82.5045	-	0.012	0.126	Pleistocene	Upper Pleistocene	Upper Pleistocene	Gopherus	polyphemus	Gopherus polyphemus	(Daudin, 1803)	-	UF uncat.	302.4	NA	NA	estimated from different skeletal elements by original authors	mo	n	N-America	Franz and Quitmyer, 2005	0.069
Surprise Cave, Alachua, Florida	USA	29.8031	-82.5045	-	0.012	0.126	Pleistocene	Upper Pleistocene	Upper Pleistocene	Gopherus	polyphemus	Gopherus polyphemus	(Daudin, 1803)	-	UF 150333	334.7	NA	NA	estimated from different skeletal elements by original authors	mo	n	N-America	Franz and Quitmyer, 2005	0.069
Surprise Cave, Alachua, Florida	USA	29.8031	-82.5045	-	0.012	0.126	Pleistocene	Upper Pleistocene	Upper Pleistocene	Gopherus	polyphemus	Gopherus polyphemus	(Daudin, 1803)	-	UF uncat.	260.11	NA	NA	estimated from different skeletal elements by original authors	mo	n	N-America	Franz and Quitmyer, 2005	0.069
Surprise Cave, Alachua, Florida	USA	29.8031	-82.5045	-	0.012	0.126	Pleistocene	Upper Pleistocene	Upper Pleistocene	Gopherus	polyphemus	Gopherus polyphemus	(Daudin, 1803)	-	UF 160332	431.48	NA	NA	estimated from different skeletal elements by original authors	mo	n	N-America	Franz and Quitmyer, 2005	0.069
Surprise Cave, Alachua, Florida	USA	29.8031	-82.5045	-	0.012	0.126	Pleistocene	Upper Pleistocene	Upper Pleistocene	Gopherus	polyphemus	Gopherus polyphemus	(Daudin, 1803)	-	UF 161669	301.97	NA	NA	estimated from different skeletal elements by original authors	mo	n	N-America	Franz and Quitmyer, 2005	0.069
Surprise Cave, Alachua, Florida	USA	29.8031	-82.5045	-	0.012	0.126	Pleistocene	Upper Pleistocene	Upper Pleistocene	Gopherus	polyphemus	Gopherus polyphemus	(Daudin, 1803)	-	UF uncat.	279.94	NA	NA	estimated from different skeletal elements by original authors	mo	n	N-America	Franz and Quitmyer, 2005	0.069
Surprise Cave, Alachua, Florida	USA	29.8031	-82.5045	-	0.012	0.126	Pleistocene	Upper Pleistocene	Upper Pleistocene	Gopherus	polyphemus	Gopherus polyphemus	(Daudin, 1803)	-	UF 138001	273.24	NA	NA	estimated from different skeletal elements by original authors	mo	n	N-America	Franz and Quitmyer, 2005	0.069
Surprise Cave, Alachua, Florida	USA	29.8031	-82.5045	-	0.012	0.126	Pleistocene	Upper Pleistocene	Upper Pleistocene	Gopherus	polyphemus	Gopherus polyphemus	(Daudin, 1803)	-	UF 161664	252.56	NA	NA	estimated from different skeletal elements by original authors	mo	n	N-America	Franz and Quitmyer, 2005	0.069
Surprise Cave, Alachua, Florida	USA	29.8031	-82.5045	-	0.012	0.126	Pleistocene	Upper Pleistocene	Upper Pleistocene	Gopherus	polyphemus	Gopherus polyphemus	(Daudin, 1803)	-	UF 160334	284.9	NA	NA	estimated from different skeletal elements by original authors	mo	n	N-America	Franz and Quitmyer, 2005	0.069
Surprise Cave, Alachua, Florida	USA	29.8031	-82.5045	-	0.012	0.126	Pleistocene	Upper Pleistocene	Upper Pleistocene	Gopherus	polyphemus	Gopherus polyphemus	(Daudin, 1803)	-	UF uncat.	278	NA	NA	estimated from different skeletal elements by original authors	mo	n	N-America	Franz and Quitmyer, 2005	0.069
Nikiti 2, Chalkidiki, Macedonia	Greece	40.2201	23.6688	Early Turolian, MN11	9	7	Miocene	Late Miocene	Late Miocene	Testudo	sp.	Testudo s. s.	Linnaeus, 1758	-	NIK 1946	189	NA	small	NA	m	n	Europe	Garcia et al., 2016	8
Djebel Krechem	Tunisia	35.0359	9.88974	Segul Formation	5.332	11.62	Miocene	Late Miocene	Late Miocene	Geochelone	sp.	Geochelone sp.	Fitzinger, 1835	-	-	1446	NA	giant	estimated from humerus (237 mm) based on ratio provided by Franz et al., 2001	eh	n	Africa	Geraads, 1989	8.476
Teiritzberg (T1 = 001/D/C), Korneuburg Basin, Lower Austria	Austria	48.3667	16.3333	Korneuburg Basin, Karpatian	16.35	16.75	Miocene	Burdigalian	Burdigalian	Paleotestudo	sp.	Paleotestudo sp.	Lapparent de Broin, 2000	NHMW, indeterminable remains (Gemel 2002b)	-	NA	163	medium	NA	m	n	Europe	Gemel R., 2002b: Weitere Schildkrötenreste aus dem Karpatium des Korneuburger Beckens (Untermiozän; Niederösterreich). in: Sovis W. & Schmid B.: Das Karpat des Korneuburger Beckens, Teil 2, Beitr.Paläont. 27: 373-393, Wien	16.55
Eggenburg-Schindergraben, Lower Austria	Austria	48.6333	15.817	Sandgruben Westhang des Calvarienberges	19.5	20.43	Miocene	Burdigalian	Burdigalian	Testudo	kalksburgensis	Testudo kalksburgensis	Toula, 1896	left epiplastron (=Testudo antiqua novicensis Deperet, 1895)	-	230	NA	NA	NA	m	n	Europe	Gemel R., 2002b: Weitere Schildkrötenreste aus dem Karpatium des Korneuburger Beckens (Untermiozän; Niederösterreich). in: Sovis W. & Schmid B.: Das Karpat des Korneuburger Beckens, Teil 2, Beitr.Paläont. 27: 373-393, Wien	19.965
Kénitra, Guilloux quarry, near Rabat	Morocco	34.3	-6.6	Sicilien moyen	0.126	0.781	Pleistocene	Middle Pleistocene	Middle Pleistocene	Testudo	kenitrensis	Testudo kenitrensis	Gmira, 1993	Holotypus: MNHN MOC 149 carapace, plastron, skull	MOC 149	132	NA	small	NA	mo	n	Africa	Gmira S., 1993: Une nouvelle espèce de tortue Testudininei (Testudo kenitrensis n. sp.) de l’Inter Amirien-Tensiftien de Kénitra (Maroc). Comptes rendus de l’Académie des Sciences de Paris -II 316: 701-707	0.4535
Ahl al Oughlam (near Casablanca)	Morocco	33.5931	-7.6164	south-west of the border of Casablanca town	2.5	2.5	Pleistocene	Gelasian	Gelasian	Testudo	sp.	Testudo sp.	Linnaeus, 1758	-	-	184	NA	NA	NA	mf	n	Africa	Gmira s., 2013	2.5
Ahl al Oughlam (near Casablanca)	Morocco	33.5931	-7.6164	south-west of the border of Casablanca town	2.5	2.5	Pleistocene	Gelasian	Gelasian	Testudo	aff. kenitrensis	Testudo aff. kenitrensis	-	-	-	142	NA	NA	NA	mf	n	Africa	Gmira s., 2013	2.5
Ahl al Oughlam (near Casablanca)	Morocco	33.5931	-7.6164	south-west of the border of Casablanca town	2.5	2.5	Pleistocene	Gelasian	Gelasian	Testudo	sp.	Testudo sp.	Linnaeus, 1758	-	-	200	NA	NA	NA	mf	n	Africa	Gmira s., 2013	2.5
Ahl al Oughlam (near Casablanca)	Morocco	33.5931	-7.6164	south-west of the border of Casablanca town	2.5	2.5	Pleistocene	Gelasian	Gelasian	Testudo	oughlamensis	Testudo oughlamensis	-	-	-	120	93	NA	NA	mo	n	Africa	Gmira s., 2013	2.5
Holzmannsdorfberg bei St. Marein	Austria	47.0167	15.6667	Sand quarry Edelsbrunner Paldau Formation, Karnerberg Subformation Early Pannonian Congeria hoernesi-Biozone	10	11.5	Miocene	Tortonian	Tortonian	Testudo	sp.	Testudo sp.	Linnaeus, 1758	CGPLJ 59883 plate fragment; 59992, 60000, 61626 carapax fragments (pleural); 60111 plastron; 60112-60113 carapax fragments; 60446 plastron fragment; 61893 peripheral; 61894 xiphiplastron sinistral; 62057 pleural; 62058 carapax plate	-	NA	211	NA	nahezu vollständiges Plastron, Länge des Stücks = 211 mm, Breite des Stücks = 154 mm	m	n	Europe	Gross M., 2002: Aus der paläontologischen Sammlung des Landesmuseums Joanneum - Die fossilen Schildkröten (Testudines). Joannea Geol. Paläont. 4: 5-68, Taf.1-22	10.75
Kanapoi	Kenya	2.3827	36.2416	-	4.12	4.17	Pliocene	Lower Pliocene	Lower Pliocene	Geochelone	crassa	Geochelone crassa	(Andrews, 1914)	-	KNM-KP 10552	865	NA	large	NA	mf	n	Africa	Harris et al., 2003	4.145
Atascosa county, Texas	USA	28.9115	28.9115	-	5.332	23.03	Miocene	Miocene	Miocene	Testudo	sp.	Testudo sp.	Linnaeus, 1758	-	-	400	NA	NA	NA	mo	n	N-America	Hay, 1902	14.181
Orange Lake 2 miles south, Marion County, Florida	USA	29.4	-82.2	-	0.012	0.126	Pleistocene	Upper Pleistocene	Upper Pleistocene	Geochelone	sp.	Geochelone sp.	Fitzinger, 1835	-	FGS V-5832	350	NA	small	estimated from femur length (43 mm) using ratio provided in Franz et al., 2001	ef	n	N-America	Holman J.A., 1959b: A Pleistocene herpetofauna near Orange Lake, Florida. Herpetologica 15(3): 121-125	0.069
Devil's Den Sinkhole, Levy County, Florida	USA	29.4071	-82.476	-	0.007	0.008	Pleistocene	Upper Pleistocene	Upper Pleistocene	Hesperotestudo	incisa	Hesperotestudo incisa	(Hay, 1916)	-	UF 23835	250	NA	small	estimated from partial plastron (ca. first third available)	e	n	N-America	Holman, 1978	0.0075
Little Salt Spring, Florida	USA	27.0753	-82.2331	-	0.012	0.012	Pleistocene	Upper Pleistocene	Upper Pleistocene	Hesperotestudo	crassiscutata	Hesperotestudo crassiscutata	(Leidy, 1889)	-	GDF 2162	1250	NA	NA	estimated from estimates based on xiphiplastral length to plastral length ratio from other specimens	ev	n	N-America	Holman & Clausenm, 1984	0.012
Little Salt Spring, Florida	USA	27.0753	-82.2331	-	0.012	0.012	Pleistocene	Upper Pleistocene	Upper Pleistocene	Hesperotestudo	crassiscutata	Hesperotestudo crassiscutata	(Leidy, 1889)	-	GDF 135-1a	425	NA	NA	NA	mo	n	N-America	Holman & Clausenm, 1984	0.012
Little Salt Spring, Florida	USA	27.0753	-82.2331	-	0.012	0.012	Pleistocene	Upper Pleistocene	Upper Pleistocene	Hesperotestudo	crassiscutata	Hesperotestudo crassiscutata	(Leidy, 1889)	-	GDF 135-2	188	NA	NA	NA	mo	n	N-America	Holman & Clausenm, 1984	0.012
Little Salt Spring, Florida	USA	27.0753	-82.2331	-	0.012	0.012	Pleistocene	Upper Pleistocene	Upper Pleistocene	Gopherus	polyphemus	Gopherus polyphemus	(Daudin, 1803)	-	GDF 135	352	NA	NA	estimated by original authors based on comparison with extant species	mo	n	N-America	Holman & Clausenm, 1984	0.012
Sulawesi (Celebes), Indonesia	Asia	-1.8479	120.528	-	2	2	Pleistocene	Upper Pleistocene	Upper Pleistocene	Megalochelys	atlas	Megalochelys atlas	Falconer and Cautley, 1844	-	-	1400	NA	giant	transformed from feet (4 - 5 feet)	mo	y	Asia	Hooijer, 1951	2
Callao de Fañabé, Tenerife	Canary Islands	28.1098	-16.7306	-	0.2	0.67	Pleistocene	Middle Pleistocene	Middle Pleistocene	Centrochelys	burchardi	Centrochelys burchardi	(Ahl, 1926)	-	TFMC	650	NA	giant	estimated by original authors based on anterior part of carapace	mo	y	Europe	Hutterer et al., 1998	0.435
Callao de Fañabé, Tenerife	Canary Islands	28.1098	-16.7306	-	0.2	0.67	Pleistocene	Middle Pleistocene	Middle Pleistocene	Centrochelys	burchardi	Centrochelys burchardi	(Ahl, 1926)	-	TFMC	940	NA	giant	estimated by original authors based on femur lenght (see Fig. 18); \The strong differences between the large and small specimens could be a result of different age, but may have been equally due to a strong size dimorphism between sexes, a phenomenon observed in Galapagos tortoises as well.\""	mo	y	Europe	Hutterer et al., 1998	0.435
Barranco de las Ballenas, Las Palmas, Gran Canaria	Canary Islands	28.1134	-15.4463	-	2.588	3.6	Pliocene	Upper Pliocene	Upper Pliocene	Centrochelys	vulcanica
Centrochelys vulcanica"	(Lopez-Jurado and Mateo, 1993)	-	DBULP	610	NA	NA	estimated by original authors	mo	y	Europe	Hutterer et al., 1998	3.094
Puerto de la Cadena, Murcia	Spain	38	-1.16667	-	5.332	7.246	Miocene	Messinian	Messinian	Titanochelon	bolivari	Titanochelon bolivari	(Hernández Pacheco, 1917)	2 complete and 1 fragmentary individual	T2BC-MU	1150	880	giant	longitud = 115 cm, anchura (CW) = 87 cm, altura (CH) = 45 cm; PL = 88 cm	m	n	Europe	Jiménez et al., 2001	6.289
Obermaintor, Ebensfeld (Lichtenfels), Franken	Germany	50.0688	10.951	-	0.012	2.588	Pleistocene	Pleistocene	Pleistocene	Testudo	hermanni	Testudo hermanni	(Gmelin, 1789)	-	SMNF 225a-c	220	NA	NA	measured from figure	mf	n	Europe	Karl & Tichy, 2002	1.3
Kohfidisch	Austria	47.1667	16.35	-	8.55	8.95	Miocene	Tortonian	Tortonian	Testudo	burgenlandica	Testudo burgenlandica	Bachmayer & Mlynarski, 1983	Holotypus: nearly complete carapace without xiphiplastron	-	112	NA	NA	NA	m	n	Europe	Karl, ??? (Einige Bemerkungen über die fossilen Schildkröten des Bundeslandes Salzburg)	8.75
Sal Island	Sal Island, Kap Verde	16.732	-22.9368	-	0.012	2.588	Pleistocene	Pleistocene	Pleistocene	Centrochelys	atlantica	Centrochelys atlantica	(Lopez-Jurado and Mateo, 1998)			400	NA	NA	NA	mo	y	Africa	Lopez-Jurado et al., 1998	1.3
Pecos River near Melena and Acme, 10-15 km NE Roswell, Chaves County, New Mexico	USA	33.47	-104.53	Rancholabrean	0.012	0.3	Pleistocene	Upper Pleistocene	Middle Pleistocene	Gopherus	agassizi	Gopherus agassizi	(Cooper, 1861)	-	-	445	NA	NA	estimated from humerus length (73 mm --> measured from figure) using ratio from Franz et al, 2001	mo	n	N-America	Lucas and Morgan, 1996	0.156
Libertador San Martín north bank Ensenada stream, 15 km E Diamante, Entre Rios Province	Argentina	-32.0876	-60.4863	Arroyo Feliciano Formation	0.12	0.12	Pleistocene	Upper Pleistocene	Upper Pleistocene	Chelonoidis	denticulata	Chelonoidis denticulata	Linnaeus 1766 (p. 325)	CICYTTP-PV-R-1-268 well preserved plastron	CICYTTP-PV-R-1-268	NA	560	NA	NA	m	n	S-America	Manzano A.S., Noriega J.I., Joyce W.G., 2009: The tropical tortoise Chelonoidis denticulata (Testudines: Testudinidae) from the Late Pleistocene of Argentina and its paleoclimatological implications. Journal of Paleontology 83(6): 975-980	0.12
Sant Quirze de Terrassa/de Galliners (del Vallès), Barcelona	Spain	41.383	2.183	-	11.2	11.8	Miocene	Tortonian	Tortonian	Testudo	catalaunica	Testudo catalaunica	Bataller, 1926	-	-	175	NA	medium	NA	m	n	Europe	Luján et al., 2016	11.5
Sant Quirze de Terrassa/de Galliners (del Vallès), Barcelona	Spain	41.383	2.183	-	11.2	11.8	Miocene	Tortonian	Tortonian	Testudo	catalaunica	Testudo catalaunica	Bataller, 1926	-	-	181	NA	medium	NA	m	n	Europe	Luján et al., 2016	11.5
Sant Quirze de Terrassa/de Galliners (del Vallès), Barcelona	Spain	41.383	2.183	-	11.2	11.8	Miocene	Tortonian	Tortonian	Testudo	catalaunica	Testudo catalaunica	Bataller, 1926	-	-	107	NA	medium	NA	m	n	Europe	Luján et al., 2016	11.5
Abocador de Can Mata (els Hostalets de Pierola)(ACM/BDA), Vallés-Penedés basin, Cataluña	Spain	41.519	1.728	Late Aragonian, Bassa de Decantació d´Aigües Pluvials	12.3	12.4	Miocene	Serravallian	Serravallian	Testudo	catalaunica	Testudo catalaunica	Bataller, 1926	-	-	232	NA	medium	NA	m	n	Europe	Luján et al., 2016	12.35
Castell de Barbera	Spain	41.37	2.183	-	11.2	11.8	Miocene	Tortonian	Tortonian	Testudo	catalaunica	Testudo catalaunica	Bataller, 1926	-	-	165	NA	medium	NA	m	n	Europe	Luján et al., 2016	11.5
Smith's Parrish, No. 3Verdmont Valley Close	Bermuda	32.3128	-64.7308	Upper Townhill Formation	0.3	0.32	Pleistocene	Middle Pleistocene	Middle Pleistocene	Hesperotestudo	bermudae	Hesperotestudo bermudae	Meylan and Sterrer, 2000	holotype	BAMZ 1991-086	270	NA	small	CW=230 mm	m	y	C-America	Meylan and Sterrer, 2000	0.31
Laetoli, Tanzania	Tanzania	-3.23346	35.1651	-	1.806	3.6	Pleistocene/Pliocene	Early Pleistocene	Upper Pliocene	Aldabrachelys	laetoliensis	\Aldabrachelys\" laetoliensis"	-	-	-	1000	NA	NA	NA	mo	n	Africa	Meylan and Auffenberg, 1986	2.703
Pellatal Phosphate Member, Varswater Formation, E Quarry Langebaanweg		-32.9649	18.173	Varswater Formation	3.6	5.332	Pliocene	Lower Pliocene	Lower Pliocene	Geochelone	stromeri	Geochelone stromeri	Meylan and Auffenberg, 1986	Holotype	SAM-L-13721	425	NA	NA	NA	m	n	Africa	Meylan and Auffenberg, 1986	4.466
Pellatal Phosphate Member, Varswater Formation, E Quarry Langebaanweg		-32.9649	18.173	Varswater Formation	3.6	5.332	Pliocene	Lower Pliocene	Lower Pliocene	Geochelone	stromeri	Geochelone stromeri	Meylan and Auffenberg, 1986	Paratype	SAM-PQ-N-140, SAM-PQ-N-147	350	NA	NA	NA	m	n	Africa	Meylan and Auffenberg, 1986	4.466
Rusinga Island, Lake Victoria, Kenya	Kenya	-0.407433	34.1918	-	15.97	23.03	Miocene	Lower Miocene	Lower Miocene	Impregnochelys	pachytectis	Impregnochelys pachytectis	Meylan and Auffenberg, 1986	Holotype	BMNH R 5708	620	NA	NA	NA	m	n	Africa	Meylan and Auffenberg, 1986	19.5
Barstow Beds, San Bernardino County, California	USA	34.9592	-116.419	Barstow Beds	5.332	11.62	Miocene	Upper Miocene	Upper Miocene	Gopherus	mohavetus	Gopherus mohavetus	Merriam, 1919	in original publications as Testudo milleri	UC 21574	NA	375	medium	NA	m	n	N-America	Brattstrom, 1961	8.476
Barstow Beds, San Bernardino County, California	USA	34.9592	-116.419	Barstow Beds	5.332	11.62	Miocene	Upper Miocene	Upper Miocene	Gopherus	mohavetus	Gopherus mohavetus	Merriam, 1919	in original publications as Testudo milleri	CIT 494/5129	360	NA	medium	NA	m	n	N-America	Brattstrom, 1961	8.476
Barstow Beds, San Bernardino County, California	USA	34.9592	-116.419	Barstow Beds	5.332	11.62	Miocene	Upper Miocene	Upper Miocene	Gopherus	mohavetus	Gopherus mohavetus	Merriam, 1919	in original publications as Testudo milleri	CIT 494/5130	334.5	339.2	medium	NA	m	n	N-America	Brattstrom, 1961	8.476
Barstow Beds, San Bernardino County, California	USA	34.9592	-116.419	Barstow Beds	5.332	11.62	Miocene	Upper Miocene	Upper Miocene	Gopherus	mohavetus	Gopherus mohavetus	Merriam, 1919	in original publications as Testudo milleri	CIT 494/5131	202	174	medium	NA	m	n	N-America	Brattstrom, 1961	8.476
Cache Peak fauna, Tehachapi Mountains, Kern County, California	USA	35.1322	-118.449	-	5.332	11.62	Miocene	Upper Miocene	Upper Miocene	Gopherus	mohavetus	Gopherus mohavetus	Merriam, 1919	in original publications as Testudo milleri	CIT 498/5133	315	327.2	medium	NA	m	n	N-America	Brattstrom, 1961	8.476
Gilliland local fauna, Burnett Ranch, 7 miles W of Vera, Knox County, Texas	USA	33.8	-99.5	Seymour Formation, late Kansan, Irvongtonian	0.7	0.7	Pleistocene	Middle Pleistocene	Middle Pleistocene	Hesperotestudo	sp.	Hesperotestudo sp.	Williams, 1950	-	47098	1500	NA	giant	The material from the Gilliland local fauna contains the remains of a giant tortoise with a shell 4 1/2 to 6 feet in length. Thus, a member of the subgenus Caudochelys, possibly a giant form similar to G. crassiscutata, is represented.	mo	n	N-America	Holman, 1969; Preston, 1966	0.7
Cedazo local fauna, Aguascalientes, Mexico	Mexico	21.824	-102.369	-	0.3	1.8	Pleistocene	Middle Pleistocene	Lower Pleistocene	Gopherus	berlandieri	Gopherus berlandieri	(Agassiz, 1857)	holotype	FC 500	195	195	small	CW=176, CH=116	m	n	C-America	Mooser, 1972	1.05
Cedazo local fauna, Aguascalientes, Mexico	Mexico	21.824	-102.369	-	0.3	1.8	Pleistocene	Middle Pleistocene	Lower Pleistocene	Gopherus	berlandieri	Gopherus berlandieri	(Agassiz, 1857)	-	-	NA	233	small	NA	m	n	C-America	Mooser, 1972	1.05
Cedazo local fauna, Aguascalientes, Mexico	Mexico	21.824	-102.369	-	0.3	1.8	Pleistocene	Middle Pleistocene	Lower Pleistocene	Gopherus	flavomarginatus	Gopherus flavomarginatus	Legler, 1959	-	-	450	NA	small	NA	m	n	C-America	Mooser, 1972	1.05
Cedazo local fauna, Aguascalientes, Mexico	Mexico	21.824	-102.369	-	0.3	1.8	Pleistocene	Middle Pleistocene	Lower Pleistocene	Geochelone	sp.	Geochelone sp.	Fitzinger, 1835	-	FC 511	340	NA	small	CW=320	mo	n	C-America	Mooser, 1972	1.05
Caballo Local Fauna, Palomas Basin, Sierra County, New Mexico	USA	32.97	-107.31	Palomas Formation, late Blancan	1.8	2.2	Pleistocene/Pliocene	Gelasian	Piacencian	Hesperotestudo	sp.	Hesperotestudo sp.	Williams, 1950	NMMNH 58287 associate partial right and left femur, fragment pelvic girdle, 63423 partial carapace and complete plastron of very large tortoise (L-7696)	NMMNH 63432	1000	NA	giant	larger than 1 m	mo	n	N-America	Morgan et al., 2011	2
Cuchillo Negro Creek Local Fauna, Engle Basin, Sierra County, New Mexico	USA	33.195	-107.257	Palomas Formation, late early Blancan	3	3.2	Pliocene	Piacencian	Piacencian	Hesperotestudo	sp.	Hesperotestudo sp.	Williams, 1950	NMMNH 57401 partial carapace and fragments of plastron, including about six associated costals, three associated peripherals, partial epiplastron (L-2786), 57402 partial plastron (L-2787)	NMMNH 7402	176	NA	small	half of a plastron displayed in figure	mf	n	N-America	Morgan et al., 2011	3.1
Lang Rongrien Rockshelter, Krabi, Thailand	Thailand	8.17972	98.8806	Unit 9	0.037	0.037	Pleistocene	Pleistocene	Pleistocene	Indotestudo	elongata	Indotestudo elongata	(Blyth, 1853)	-	-	270	NA	NA	NA	m	n	Asia	Mudar and Anderson, 2007	0.037
Banana Hole, New Providence Island	Bahamas	25.015	-77.5223	-	0.012	0.013	Pleistocene	Pleistocene	Pleistocene	Geochelone	sp.	Geochelone sp.	Fitzinger, 1835	-	-	600	NA	NA	Fragments of
a carapace and plastron came from an individuals)
estimated to have had a carapace length of
at least 600 mm (Auffenberg, 1967)"	mo	y	N-America	Olson, 1982	0.0125
Smith's Parrish, No. 3Verdmont Valley Close	Bermuda	32.3128	-64.7308	Upper Townhill Formation	0.3	0.32	Pleistocene	Middle Pleistocene	Middle Pleistocene	Hesperotestudo	bermudae	Hesperotestudo bermudae	Meylan and Sterrer, 2000	-	BAMZ 2004 228 011	500	NA	NA	NA	m	y	C-America	Olson and Meylan, 2009	0.31
Aveiras de Baixo, Azambuja	Portugal	39.0613	-8.88399	MN9	7.246	11.62	Miocene	Tortonian	Tortonian	Titanochelon	cf. bolivari	Titanochelon cf. bolivari	(Hernández Pacheco, 1917)	-	MG 30490	1500	NA	giant	estimated from fragmentary carapace (anteroposterior part = 115 cm), figure	mf	n	Europe	Pérez-García et al., 2016: Westernmost records of extinct large tortoises	9.433
Charneco do Lumiar	Portugal	38.7887	-9.14127	MN5	13.82	15.97	Miocene	Langhian	Langhian	Titanochelon	cf. bolivari	Titanochelon cf. bolivari	(Hernández Pacheco, 1917)	-	MG 30491	1300	NA	giant	The estimated length of this shell was certainly greater than one meter but a precise estimation is not possible.
ev"	n	Europe	Pérez-García et al., 2016: Westernmost records of extinct large tortoises	14.895
Quinta da Farinheira	Portugal	38.7435	-9.14953	MN5	13.82	15.97	Miocene	Langhian	Langhian	Titanochelon	cf. bolivari	Titanochelon cf. bolivari	(Hernández Pacheco, 1917)	-	MF 4766	1600	NA	giant	estimated from humerus (=268 mm, measured from figure) using ratio provided by Franz et al. (2001)	ef	n	Europe	Pérez-García et al., 2016: Westernmost records of extinct large tortoises	14.895
Sierra de Quibas, Abanilla, Murcia	Spain	38.3	-1.05	Late Matuyama, Collado del Rey (most from Entrada Cueva)	1.3	1.4	Pleistocene	Lower Pleistocene	Lower Pleistocene	Eurotestudo	hermanni	Eurotestudo hermanni	(Gmelin, 1789)	-	GCP.CV-952	284	211	NA	measured from figure	mf	n	Europe	Pérez-García et al., 2015	1.35
Neuville-aux-Bois, Loiret	France	48.067	2.05	Sables de Neuville	16	20	Miocene	Burdigalian	Burdigalian	Testudo	promarginata	Testudo promarginata	Reinach, 1900	-	-	310	295	NA	measured from figure	mf	n	Europe	Pérez-García A., 2016: Analysis of the Iberian Aragonian record of Paleotestudo, and refutation of the validity of the Spanish `Testudo catalaunica´ and the French `Paleotestudo canetotiana´. Spanish Journal of Palaeontology 31(2): 321-340	18
Saint-Gérand-le-Puy, Allier	France	46.2581	3.512	Calcaire à Phryganes, Indusial Limestone (Indusia tabulosa, Insecta: Trichoptera)	21	22	Miocene	Aquitanian	Aquitanian	Testudo	promarginata	Testudo promarginata	Reinach, 1900	MNHN.F. SG 292 anterior carapace, SG 326 anterior plastral lobe	MNHN.F. SG 292	230	NA	NA	measured from figure (fragmentary carapace)	mf	n	Europe	Pérez-García A., 2016: Analysis of the Iberian Aragonian record of Paleotestudo, and refutation of the validity of the Spanish `Testudo catalaunica´ and the French `Paleotestudo canetotiana´. Spanish Journal of Palaeontology 31(2): 321-340	21.5
Saint-Gérand-le-Puy, Allier	France	46.2581	3.512	Calcaire à Phryganes, Indusial Limestone (Indusia tabulosa, Insecta: Trichoptera)	21	22	Miocene	Aquitanian	Aquitanian	Testudo	promarginata	Testudo promarginata	Reinach, 1900	MNHN.F. SG 292 anterior carapace, SG 326 anterior plastral lobe	MNHN.F. SG 326	NA	277	NA	measured from figure	mf	n	Europe	Pérez-García A., 2016: Analysis of the Iberian Aragonian record of Paleotestudo, and refutation of the validity of the Spanish `Testudo catalaunica´ and the French `Paleotestudo canetotiana´. Spanish Journal of Palaeontology 31(2): 321-340	21.5
Sansan, Gers (lake)	France	43.9	-0.5	Gers; drainage: Palaeo-Garonne; (ponds, pools)	13.5	13.7	Miocene	Serravallian	Langhian	Paleotestudo	antiqua	Paleotestudo antiqua	(Bronn, 1831)	MNHN.F SA 1673 carapace, SA 15657 shell, SA 1868 shell, and very abundant remains in the MNHN collection (=Testudo canetotiana Lartet, 1851)	MNHN.F SA 15657	234	NA	NA	measured from figure	mf	n	Europe	Pérez-García A., 2016: Analysis of the Iberian Aragonian record of Paleotestudo, and refutation of the validity of the Spanish `Testudo catalaunica´ and the French `Paleotestudo canetotiana´. Spanish Journal of Palaeontology 31(2): 321-340	13.6
Sansan, Gers (lake)	France	43.9	-0.5	Gers; drainage: Palaeo-Garonne; (ponds, pools)	13.5	13.7	Miocene	Serravallian	Langhian	Paleotestudo	antiqua	Paleotestudo antiqua	(Bronn, 1831)	MNHN.F SA 1673 carapace, SA 15657 shell, SA 1868 shell, and very abundant remains in the MNHN collection (=Testudo canetotiana Lartet, 1851)	MNHN.F SA 1868	240	NA	NA	measured from figure	mf	n	Europe	Pérez-García A., 2016: Analysis of the Iberian Aragonian record of Paleotestudo, and refutation of the validity of the Spanish `Testudo catalaunica´ and the French `Paleotestudo canetotiana´. Spanish Journal of Palaeontology 31(2): 321-340	13.6
Sansan, Gers (lake)	France	43.9	-0.5	Gers; drainage: Palaeo-Garonne; (ponds, pools)	13.5	13.7	Miocene	Serravallian	Langhian	Paleotestudo	antiqua	Paleotestudo antiqua	(Bronn, 1831)	MNHN.F SA 1673 carapace, SA 15657 shell, SA 1868 shell, and very abundant remains in the MNHN collection (=Testudo canetotiana Lartet, 1851)	MNHN.F SA 10342	191	NA	NA	measured from figure (fragmentary carapace)	mf	n	Europe	Pérez-García A., 2016: Analysis of the Iberian Aragonian record of Paleotestudo, and refutation of the validity of the Spanish `Testudo catalaunica´ and the French `Paleotestudo canetotiana´. Spanish Journal of Palaeontology 31(2): 321-340	13.6
Can Mas near El Papiol, Barcelone province, Cataluña, Vallés-Penedés basin	Spain	41.4333	2.0167	-	16.8	17.8	Miocene	Burdigalian	Burdigalian	Paleotestudo	cf. antiqua	Paleotestudo cf. antiqua	(Bronn, 1831)	MGSB 24980 partial carapace (=type Paralichelys catalaunicus Bergounioux, 1951)	MGSB 24980	113	NA	NA	measured from figure (fragmentary carapace)	mf	n	Europe	Pérez-García A., 2016: Analysis of the Iberian Aragonian record of Paleotestudo, and refutation of the validity of the Spanish `Testudo catalaunica´ and the French `Paleotestudo canetotiana´. Spanish Journal of Palaeontology 31(2): 321-340	17.3
Barajas, Madrid	Spain	40.4839	-3.5679	Orleanian	14	16	Miocene	Langhian	Langhian	Paleotestudo	antiqua	Paleotestudo antiqua	(Bronn, 1831)	MNCN relatively complete shell, high percentage of the plastron plates, internal mold of carapace	MNCN 79862	275	238	NA	measured from figure	mf	n	Europe	Pérez-García A., 2016: Analysis of the Iberian Aragonian record of Paleotestudo, and refutation of the validity of the Spanish `Testudo catalaunica´ and the French `Paleotestudo canetotiana´. Spanish Journal of Palaeontology 31(2): 321-340	15
Illescas, Toledo	Spain	40.1265	-3.8489	Astaracian	12	13	Miocene	Serravallian	Serravallian#	Paleotestudo	antiqua	Paleotestudo antiqua	(Bronn, 1831)	STUS 14244 internal mold carapace	STUS 14244	NA	258	NA	measured from figure	mf	n	Europe	Pérez-García A., 2016: Analysis of the Iberian Aragonian record of Paleotestudo, and refutation of the validity of the Spanish `Testudo catalaunica´ and the French `Paleotestudo canetotiana´. Spanish Journal of Palaeontology 31(2): 321-340	12.5
Cueva de la Victoria-1 (CV-1), Carthagène, Murcia	Spain	37.6167	-0.8667	situated in the eastern side of the Massif of San Ginés de la Jara, a calcareous massif near a little interior sea the Mar Menor and the easternmost spurs of the Sierra Minera 23 species of birds, 13 of small mammals, 20 of large mammals Theropithecus sp. MmQ3	1.1	1.2	Pleistocene	Lower Pleistocene	Lower Pleistocene	Eurotestudo	hermanni	Eurotestudo hermanni	(Gmelin, 1789)	-	CV-MC-917	126	NA	NA	measured from figure (carapace fragments)	mf	n	Europe	Pérez-García, 2012	1.15
Cerro de los Batallones, Madrid	Spain	40.1794	-3.7246	Vallesian	9	10	Miocene	Tortonian	Tortonian	Paleotestudo	sp.	Paleotestudo sp.	Lapparent de Broin, 2000	several well-preserved shells	BAT-2-129	261	235	NA	measured from figure	mf	n	Europe	Pérez-García and Murelaga, 2013	9.5
Cerro de los Batallones, Madrid	Spain	40.1794	-3.7246	Vallesian	9	10	Miocene	Tortonian	Tortonian	Paleotestudo	sp.	Paleotestudo sp.	Lapparent de Broin, 2000	several well-preserved shells	BAT-1-4252	270	NA	NA	measured from figure	mf	n	Europe	Pérez-García and Murelaga, 2013	9.5
Cerro de los Batallones, Madrid	Spain	40.1794	-3.7246	Vallesian	9	10	Miocene	Tortonian	Tortonian	Paleotestudo	sp.	Paleotestudo sp.	Lapparent de Broin, 2000	several well-preserved shells	BAT-1'02-E6-179	170	160	NA	measured from figure	mf	n	Europe	Pérez-García and Murelaga, 2013	9.5
Cerro de los Batallones, Madrid	Spain	40.1794	-3.7246	Vallesian	9	10	Miocene	Tortonian	Tortonian	Titanochelon	bolivari	Titanochelon bolivari	(Hernández Pacheco, 1971)	almost complete skeletons	BAT-10'08-G3-116	1300	NA	giant	measured from figure	mf	n	Europe	Pérez-García and Murelaga, 2013	9.5
Le Ville, Upper Valdarno	Italy	43.4833	12.0833	-	1.8	1.8	Pleistocene	Lower Pleistocene	Lower Pleistocene	Eurotestudo	globosa	Eurotestudo globosa	(Portis, 1890)	Type locality	-	263	NA	NA	Lunghezza assoluta del carapace mm. 263, sua larghezza mm. 133 altezza in unione al piastrone mm. 97).	m	n	Europe	Portis A., 1890: I Rettili pliocenici del Valdarno superiore e di alcune altre località plioceniche di Toscana. Le Monnier Suc., Firenze (1–32) or Lapparent de Broin F. de, Bour R., Perälä J., 2006: Morphological definition of Eurotestudo (Testudinidae, Chelonii): First part. Annales de Paléontologie 92(3): 255-304 or Lapparent de Broin F. de, Bour R., Perälä J., 2006a: Morphological definition o…	1.8
Gilliland local fauna, Burnett Ranch, 7 miles W of Vera, Knox County, Texas	USA	33.8	-99.5	Seymour Formation, late Kansan, Irvongtonian	0.7	0.7	Pleistocene	Middle Pleistocene	Middle Pleistocene	Hesperotestudo	sp.	Hesperotestudo sp.	Williams, 1950	-	40601	1800	NA	giant	The plastron of No. 40601 is approximately 75 cm from the hyo-hypoplastral suture to the front, which makes the turtle about 6 ft long.	mo	n	N-America	Preston, 1966	0.7
Gilliland local fauna, Burnett Ranch, 7 miles W of Vera, Knox County, Texas	USA	33.8	-99.5	Seymour Formation, late Kansan, Irvongtonian	0.7	0.7	Pleistocene	Middle Pleistocene	Middle Pleistocene	Geochelone	sp.	Geochelone sp.	Fitzinger, 1835	-	UMMP 46787	170	NA	small	measured from figure (partial carapace)	mf	n	N-America	Preston, 1966	0.7
Gilliland local fauna, Burnett Ranch, 7 miles W of Vera, Knox County, Texas	USA	33.8	-99.5	Seymour Formation, late Kansan, Irvongtonian	0.7	0.7	Pleistocene	Middle Pleistocene	Middle Pleistocene	Gopherus	polyphemus	Gopherus polyphemus	(Daudin, 1803)	-	UMMP 41509	NA	490	large	measured from figure (complete plastron)	mf	n	N-America	Preston, 1966	0.7
Municipio de Villagrán, Tamaulipas	Mexico	24.4693	-99.1852	Rancholabrean	0.011	0.24	Pleistocene	Late Pleistocene	Late Pleistocene	Gopherus	donlaloi	Gopherus donlaloi	Reynoso and Montellano-Ballesteros, 2004	Paratype	IGM 6079	580	513	large	NA	mo	n	C-America	Reynoso and Montellano-Ballesteros, 2004	0.1255
Ghaba	Oman	21.3983	57.6241	-	15.5	17.5	Miocene	Burdigalian	Burdigalian	Geochelone	sp.	Geochelone sp.	Fitzinger, 1835	-	-	800	NA	large	L'espèce a la taille de l'actuelle G. (Centrochelys) sulcata […]	ev	n	Asia	Roger, 1994	16.5
Lakonia	Greece	36.9	22.6	-	1.64	1.8	Pleistocene	Lower Pleistocene	Lower Pleistocene	Testudo	marginata	Testudo marginata	Schoepff, 1792	-	-	210	NA	small	NA	m	n	Europe	Schleich H.H., 1982a: Testudo marginata Schoepff aus plio/pleistozänen Ablagerungen SE-Lakoniens (Peloponnes, Griechenland). Paläontologische Zeitschrift 56:259-264	1.72
Bumiayu, Java Island	Indonesia	-7.2889	109.522	-	0.781	2.588	Pleistocene	Lower Pleistocene	Lower Pleistocene	Megalochelys	sp.	Megalochelys sp.	Falconer and Cautley, 1844	-	-	NA	174	giant	NA	m	y	Asia	Setiyabudi, 2009	1.6845
Sulawesi (Celebes), Indonesia	Asia	-1.8479	120.528	-	2	2	Pleistocene	Upper Pleistocene	Upper Pleistocene	Megalochelys	atlas	Megalochelys atlas	Falconer and Cautley, 1844	-	-	NA	1500	giant	transformed from feet (4 - 5 feet)	mo	y	Asia	Setiyabudi, 2009	2
Siwalik	India/Nepal	27.6956	82.3864	-	0.781	3.6	Pliocene/Pleistocene	Lower Pleistocene	Upper Pliocene	Megalochelys	atlas	Megalochelys atlas	Falconer and Cautley, 1844	-	-	2000	NA	giant	NA	mo	n	Asia	Setiyabudi, 2009	2.1905
Flores	Indonesia	-8.68345	121.072	-	0.9	0.9	Pleistocene	Lower Pleistocene	Lower Pleistocene	Megalochelys	sp.	Megalochelys sp.	Falconer and Cautley, 1844	-	-	1200	NA	giant	NA	ev	y	Asia	Setiyabudi, 2009	0.9
Leithagebirge between Au and Loretto	Austria	47.9151	16.5358	-	16	20	Miocene	Burdigalian	Burdigalian	Testudo	kalksburgensis	Testudo kalksburgensis	Toula, 1896	partial posterior plastron, posterior marginalia, pygale	-	225	NA	NA	NA	mo	n	Europe	Siebenrock F., 1914: Testudo kalksburgensis Toula aus dem Leithagebirge. Jahrbuch der Kaiserlich-Königlichen Geologischen Reichsanstalt 64(1-2): 357-362	18
Ahl al Oughlam (near Casablanca)	Morocco	33.5931	-7.6164	south-west of the border of Casablanca town	2.5	2.5	Pleistocene	Gelasian	Gelasian	Centrochelys	marocana	Centrochelys marocana	-	-	-	2050	NA	NA	NA	mo	n	Africa	Lapparent de Broin F.de, 2002a: A giant tortoise from the Late Pliocene of Lesvos Island (Greece) and its possible relationships. Annales Geologiques des Pays Helleniques, 1e Serie, t.XXXIX, fasc. A: 99-130	2.5
Corrida, Malta	Malta	35.8749	14.5104	-	2.588	7.246	Pliocene/Miocene	Pliocene	Miocene	Centrochelys	robusta	Centrochelys robusta	Adams, 1877	-	-	1100	NA	giant	estimated by original author from tibis	mo	y	Europe	Adams A.L., 1877: On gigantic land-tortoises and a small freshwater species from the ossiferous caverns of Malta, together with a list of their fossil fauna; and a note on Chelonian remains from the rock-cavities of Gibraltar. Quarterly Journal of the Geological Society of London 33: 177-191	4.917
Corrida, Malta	Malta	35.8749	14.5104	-	2.588	7.246	Pliocene/Miocene	Pliocene	Miocene	Centrochelys	robusta	Centrochelys robusta	Adams, 1877	-	-	850	NA	giant	estimated by original author from tibis	mo	y	Europe	Adams A.L., 1877: On gigantic land-tortoises and a small freshwater species from the ossiferous caverns of Malta, together with a list of their fossil fauna; and a note on Chelonian remains from the rock-cavities of Gibraltar. Quarterly Journal of the Geological Society of London 33: 177-191	4.917
Yonaguni-shima, Ryuku Islands	Japan	24.4589	122.995	-	0.011	0.011	Holocene	Holocene	Holocene	Manouria	oyamai	Manouria oyamai	Takahashi, Otsuka, and Hirayama 2003	-	-	450	NA	large	estimated from femur (62.5 mm length) and according to Fossil Checklist	mo	y	Asia	Takahashi et al., 2008; Takahashi et al., 2003	0.011
Sabertooth Camel Maze, Dry Cave (UTEP 5), Eddy County, New Mexico	USA	32	-104	Early/Early Mid Wisconsin	0.024	0.027	Pleistocene	Upper Pleistocene	Upper Pleistocene	Gopherus	agassizi	Gopherus agassizi	(Cooper, 1861)	-	-	252	NA	NA	female	m	n	N-America	Van Devender T.R., Moodie K.B., Harris A.H., 1976: The desert tortoise (Gopherus agassizi) in the Pleistocene of the northern Chihuahuan Desert. Herpetologica 32: 298-304	0.0255
Platania, Drama basin	Greece	41.1968	24.395	-	5.3	11.6	Miocene	Upper Miocene	Upper Miocene	Testudo	graeca	Testudo graeca	Linnaeus, 1758	-	LGPUT PLD 70	210	205	NA	measured from figure	mf	n	Europe	Vlachos and Tsoukala, 2014	8.45
Arroyo Toropí, Corrientes	Argentina	-29.9171	-59.4755	-	0.022	0.055	Pleistocene	Late Pleistocene	Late Pleistocene	Chelonoidis	lutzae	Chelonoidis lutzae	Zacarías et al., 2013	-	CTES-PZ-7391	830	720	NA	NA	m	n	S-America	Zacarías et al., 2013	0.0385
Texas	USA	33.286	-101.13	-	0.0117	0.781	Pleistocene	Late Pleistocene	Middle Pleistocene	Gopherus	laticaudatus	Gopherus laticaudatus	(Cope 1893)	-	-	375	NA	NA	NA	mo	n	N-America	Rhodin et al., 2015	0.39635
Texas	USA	33.286	-101.13	-	0.781	2.588	Pleistocene	Early Pleistocene	Early Pleistocene	Gopherus	pertenuis	Gopherus pertenuis	(Cope 1892b)	-	-	1050	NA	NA	NA	mo	n	N-America	Rhodin et al., 2015	1.6845
Texas	USA	33.286	-101.13	-	0.781	3.6	Pleistocene	Late Pleistocene	Early Pleistocene	Hesperotestudo	campester	Hesperotestudo campester	(Hay, 1908a)	-	-	1000	NA	NA	NA	mo	n	N-America	Rhodin et al., 2015	2.1905
Kansas	USA	39.6348	-100.389	-	0.781	2.588	Pleistocene	Early Pleistocene	Early Pleistocene	Hesperotestudo	turgida	Hesperotestudo turgida	(Cope 1892a)	-	-	230	NA	NA	NA	mo	n	N-America	Rhodin et al., 2015	1.6845
Punjab	Indien	31.047	75.3682	-	0.781	3.6	Pleistocene	Late Pleistocene	Early Pleistocene	Manouria	punjabiensis	Manouria punjabiensis	(Lydekker 1889b)	-	-	900	NA	NA	NA	mo	n	Asia	Rhodin et al., 2015	2.1905
Zhejiang	China	29.1416	119.789	-	0.781	2.588	Pleistocene	Early Pleistocene	Early Pleistocene	Testudo	changshanensis	Testudo changshanesis	Wei et al., 1975	-	-	330	NA	NA	NA	mo	n	Asia	Rhodin et al., 2015	1.6845
Gerogia (Caucasus)	Georgia	41.1063	46.5572	-	0.781	3.6	Pleistocene	Late Pleistocene	Early Pleistocene	Testudo	transcaucasia	Testudo transcaucasia	Chkhikvadze, 1979	-	-	150	NA	NA	NA	mo	n	Asia	Rhodin et al., 2015	2.1905
Khatlon	Taijikistan	37.7125	69.0245	-	0.781	3.6	Pleistocene	Late Pleistocene	Early Pleistocene	Testudo	ranovi	Testudo ranovi	Khosatzky and Mlynarski, 1966b	-	-	200	NA	NA	NA	mo	n	Asia	Rhodin et al., 2015	2.1905
Guangxi	China	23.5689	108.682	-	0.781	2.588	Pleistocene	Early Pleistocene	Early Pleistocene	gen.	indet.	gen. indet.	Yeh, 1963a	-	-	900	NA	NA	NA	mo	n	Asia	Rhodin et al., 2015	1.6845
South Africa	South Africa	-26.99	27.49	-	0.781	5.332	Pleistocene	Pliocene	Early Pleistocene	Homopus	fenestratus	Homopus fenestratus	Cooper and Broadley, 1990	-	-	90	NA	NA	NA	mo	n	Africa	Rhodin et al., 2015	3.0565
Shuwaihat	United Arabian Emirates	24.1	52.44	Baynanah Formation	6	8	Miocene	Messinian	Tortonian	Geochelone	sp.	Geochelone sp.	Fitzinger, 1835	-	AUH 107	580	NA	large	specimen belongs to a tall species of tortoise (terrestrial form)	mo	n	Africa	De Lapparent de Broin and Van Dijk. 1999. Chelonia from the Late Miocene Baynunah Formation, Emirate of Abu Dhabi, United Arab Emirates: palaeogeographic implications . in P. J. Whybrow and A. Hill, eds., Fossil Vertebrates of Arabia. Yale University Press, New Haven and London. 136-162	7
Valles de Fuentidueña, Segovia Province	Spain	41.4167	-4	-	9.7	11.1	Miocene	Tortonian	Tortonian	Testudo	aff. catalaunica	Testudo aff. catalaunica	(Bataller, 1926)	-	-	220	NA	NA	NA	mo	n	Europe	E. Jimenez Fuentes. 1981. Primeros testudinidae (Chelonia) del Vallesiense de Los Valles de Fuentidueña (Segovia). Estudios Geologicos37:359-368	10.4
Madison County, Montana	USA	45.1	-112.233	-	15.97	23.03	Early Miocene	Burdigalian	Aquitanian	Testudo	primaeva	Testudo primaeva	Oelrich, 1950	partial skeleton (nearly complete plastron and carapace plus many postcrania)	UMMP 25758	350	265	NA	NA	m	n	N-America	T. M. Oelrich. 1950. A new Testudo from Madison County, Montana. Contributions from the Museum of Paleontology, University of Michigan8(4):43-58	19.5
Holder, Alachua, Florida	USA	28.9667	-82.4167	Alachua Formation	5.333	11.608	Late Miocene	Zanclean	Serravallian	Floridemys	nanus	Floridemys nanus	Hay, 1916	complete shell	USNM 10247	105	NA	NA	NA	m	n	N-America	W. Auffenberg. 1963. Fossil testudinine turtles of Florida: genera. Geochelone and Floridemys. Bulletin of the Florida State Museum, Biological Sciences 7(2):53-97	8.4705
Espuella, near Dockum, Texas	USA	33.4833	-100.833	-	0.0117	23.03	Late Miocene	Pleistocene	Miocene	Hesperotestudo	turgida	Hesperotestudo turgida	(Cope 1892a)	-	-	NA	220	small	NA	m	n	N-America	T. M. Oelrich. 1957. The status of the Upper Pliocene turtle, Testudo turgida Cope. Journal of Paleontology 31(1):228-241	11.5208
South Dakota	USA	43.3	-102.5	-	10.3	13.6	Miocene	Serravallian	Serravallian	Testudo	niobrarensis	Testudo niobrarensis	-	-	SDSM 5370	NA	405	NA	NA	m	n	N-America	M. Green. 1956. The lower Pliocene Ogallala-Wolf Creek vertebrate fauna, South Dakota. Journal of Paleontology 30(1):146-169	11.95
South Dakota	USA	43.3	-102.5	-	10.3	13.6	Miocene	Serravallian	Serravallian	Testudo	niobrarensis	Testudo niobrarensis	-	-	SDSM 5371	NA	210	NA	NA	m	n	N-America	M. Green. 1956. The lower Pliocene Ogallala-Wolf Creek vertebrate fauna, South Dakota. Journal of Paleontology 30(1):146-169	11.95
Brewster, Texas	USA	29.2	-103.2	-	20.43	24.8	Early Miocene	Burdigalian	Aquitanian	Geochelone	sp.	Geochelone sp.	Fitzinger, 1835	carapace and plastron	40635-33	170	143	NA	NA	m	n	N-America	M. S. Stevens, J. B. Stevens, and M. R. Dawson. 1969. New Early Miocene Formation and Vertebrate Local Fauna, Big Bend National Park, Brewster County, Texas. Pearce-Sellards Series 15:1-15	22.615
Nei Mongol	Mongolia	43.4147	113.118	-	11.608	15.97	Middle Miocene	Tortonian	Langhian	Testudo	cf. shensiensis	Testudo cf. shensiensis	-	complete shell	AM6726	246	NA	NA	NA	mf	n	Asia	C. W. Gilmore. 1934. Fossil Turtles of Mongolia: Second Contribution. American Museum Novitates (689)1-14	13.789
San Bernardino, California	USA	34.8	-117	-	13.6	20.43	Miocene	Serravallian	Burdigalian	Gopherus	dehiscus	Gopherus dehiscus	Des Lauriers, 1965	several complete shells	LACM400(26)/5178	153	NA	NA	NA	mo	n	N-America	J. R. Des Lauriers. 1965. A new Miocene tortoise from southern California. Bulletin of the Southern California Academy of Sciences 64:1-10	17.015
San Bernardino, California	USA	34.8	-117	-	13.6	20.43	Miocene	Serravallian	Burdigalian	Gopherus	dehiscus	Gopherus dehiscus	Des Lauriers, 1965	several complete shells	LACM400(25)/5182	140	NA	NA	NA	mo	n	N-America	J. R. Des Lauriers. 1965. A new Miocene tortoise from southern California. Bulletin of the Southern California Academy of Sciences 64:1-10	17.015
San Bernardino, California	USA	34.8	-117	-	13.6	20.43	Miocene	Serravallian	Burdigalian	Gopherus	dehiscus	Gopherus dehiscus	Des Lauriers, 1965	several complete shells	LACM400(25)/5181	124	NA	NA	NA	mo	n	N-America	J. R. Des Lauriers. 1965. A new Miocene tortoise from southern California. Bulletin of the Southern California Academy of Sciences 64:1-10	17.015
San Bernardino, California	USA	34.8	-117	-	13.6	20.43	Miocene	Serravallian	Burdigalian	Gopherus	dehiscus	Gopherus dehiscus	Des Lauriers, 1965	several complete shells	LACM400(25)/5184	176.2	NA	NA	NA	mo	n	N-America	J. R. Des Lauriers. 1965. A new Miocene tortoise from southern California. Bulletin of the Southern California Academy of Sciences 64:1-10	17.015
Brewster, Florida	USA	27.753	-81.98	-	11.62	13.82	Middle Miocene	Tortonian	Langhian	Testudo	hayi	Testudo hayi	Sellards, 1916	one shell	-	1500	NA	large	five feet in length	ev	n	N-America	E. H. Sellards. 1916. A new tortoise and a supplementary note on the gavial, Tomistoma americana. American Journal of Science 42:235-240	12.72
